# Supplementary material for: Metabolic impact of weight variations in Icelandic horses
Source: PeerJ. 2021 Jan 28;9:e10764. doi: 10.7717/peerj.10764 (PMC7847705; doi:10.7717/peerj.10764)
Supplement: Supplemental Information 1 — Includes the sample data, feature data and raw and preprocessed concentration data. Rows of the sample data correspond to columns in the concentration data sheets (rownames correspond to column names) and rows of the feature data sheet correspond to the rows of the concentration data sheets. [file peerj-09-10764-s001.xlsx]

## Sheet: sample_data
	PBC1	PBC2	Sample Bar Code	Sample Type	Sample Identification	Sample Description	Submission Name	Plate Production No.	Well Position	Sample Volume	Measurement Time	Horse	OGT	Time	Batch	Proc	Weight	rWeight	AUC	rAUC	Group	Sex	Age
10	1015121968-1	1015121953-1	1015121503	Sample	01-OGT-I-P-+120	80	Juni 2019	P180534	55	10	2019.07.05 03:50:52 | 2019.07.05 03:54:37 | 2019.07.08 12:32:41	1	OGT-I	120	P180534	245	8.28317	1.07762	12.6238	1.10992	HIGH	female	29
11	1015121968-1	1015121953-1	1015121125	Sample	01-OGT-V-P-+120	80	Juni 2019	P180534	5	10	2019.07.05 01:25:16 | 2019.07.05 01:21:31 | 2019.07.08 09:55:07	1	OGT-V	120	P180534	225	7.99228	0.880111	11.7599	0.609719	HIGH	female	29
12	1015121968-1	1015121953-1	1015121435	Sample	02-OGT-III-P-pre	89	Juni 2019	P180534	66	10	2019.07.08 11:37:31 | 2019.07.05 03:02:19 | 2019.07.05 02:58:36	2	OGT-III	0	P180534	238	8.57525	1.00634	15.4574	1.48061	HIGH	female	19
13	1015121968-1	1015121953-1	1015121575	Sample	02-OGT-V-P-pre	89	Juni 2019	P180534	56	10	2019.07.05 04:54:24 | 2019.07.05 04:50:39 | 2019.07.08 13:35:43	2	OGT-V	0	P180534	253	8.49365	0.950872	13.8452	0.484284	HIGH	female	19
18	1015121968-1	1015121953-1	1015121076	Sample	03-OGT-I-P-+120	104	Juni 2019	P180534	40	10	2019.07.08 09:15:42 | 2019.07.05 00:47:57 | 2019.07.05 00:44:13	3	OGT-I	120	P180534	220	8.65964	1.0259	12.7796	0.735216	LOW	stallion	14
19	1015121968-1	1015121953-1	1015121522	Sample	03-OGT-IV-P-+120	104	Juni 2019	P180534	91	10	2019.07.08 12:56:19 | 2019.07.05 04:17:00 | 2019.07.05 04:13:16	3	OGT-IV	120	P180534	248	8.5524	0.95226	13.4672	1.18417	LOW	stallion	14
20	1015121968-1	1015121953-1	1015121159	Sample	04-OGT-III-P-+120	116	Juni 2019	P180534	53	10	2019.07.05 01:51:25 | 2019.07.05 01:55:08 | 2019.07.08 10:26:36	4	OGT-III	120	P180534	229	8.52136	1.00109	15.4078	1.04053	HIGH	gelding	18
21	1015121968-1	1015121953-1	1015121061	Sample	04-OGT-II-P-pre	113	Juni 2019	P180534	28	10	2019.07.08 09:07:50 | 2019.07.05 00:40:30 | 2019.07.05 00:36:45	4	OGT-II	0	P180534	219	8.53696	1.012	16.1496	1.74008	HIGH	gelding	18
22	1015121968-1	1015121953-1	1015121042	Sample	05-OGT-III-P-+120	128	Juni 2019	P180534	4	10	2019.07.05 00:25:34 | 2019.07.05 00:21:49 | 2019.07.08 08:52:04	5	OGT-III	120	P180534	217	8.43657	1	12.8279	1.52874	HIGH	gelding	14
23	1015121968-1	1015121953-1	1015121111	Sample	05-OGT-IV-P-pre	125	Juni 2019	P180534	88	10	2019.07.08 09:47:14 | 2019.07.05 01:14:04 | 2019.07.05 01:17:48	5	OGT-IV	0	P180534	224	8.34649	0.939306	11.8613	0.782093	HIGH	gelding	14
24	1015121968-1	1015121953-1	1015121488	Sample	06-OGT-II-P-+120	140	Juni 2019	P180534	31	10	2019.07.05 03:35:55 | 2019.07.05 03:39:39 | 2019.07.08 12:16:56	6	OGT-II	120	P180534	243	8.56387	0.974227	15.4149	1.09432	HIGH	female	24
25	1015121968-1	1015121953-1	1015121556	Sample	06-OGT-I-P-+120	140	Juni 2019	P180534	32	10	2019.07.08 13:19:58 | 2019.07.05 04:39:26 | 2019.07.05 04:35:41	6	OGT-I	120	P180534	251	8.6417	1.02835	15.5968	1.24133	HIGH	female	24
26	1015121968-1	1015121953-1	1015121440	Sample	06-OGT-IV-P-pre	137	Juni 2019	P180534	78	10	2019.07.08 11:45:24 | 2019.07.05 03:06:04 | 2019.07.05 03:09:46	6	OGT-IV	0	P180534	239	8.65607	1.03866	14.8423	0.73582	HIGH	female	24
27	1015121968-1	1015121953-1	1015120992	Sample	07-OGT-II-P-+120	152	Juni 2019	P180534	39	10	2019.07.05 16:46:58 | 2019.07.04 23:48:17 | 2019.07.04 23:44:34	7	OGT-II	120	P180534	212	8.71213	0.995249	14.2766	1.06545	HIGH	gelding	22
28	1015121968-1	1015121953-1	1015121561	Sample	07-OGT-I-P-pre	149	Juni 2019	P180534	44	10	2019.07.05 04:43:10 | 2019.07.05 04:46:55 | 2019.07.08 13:27:51	7	OGT-I	0	P180534	252	8.81172	1.06651	14.6496	1.37975	HIGH	gelding	22
29	1015121968-1	1015121953-1	1015121473	Sample	07-OGT-IV-P-+120	152	Juni 2019	P180534	19	10	2019.07.05 03:28:27 | 2019.07.05 03:32:12 | 2019.07.08 12:09:02	7	OGT-IV	120	P180534	242	8.69832	0.985748	13.9642	0.857958	HIGH	gelding	22
30	1015121968-1	1015121953-1	1015121144	Sample	07-OGT-V-P-pre	149	Juni 2019	P180534	41	10	2019.07.05 01:47:39 | 2019.07.05 01:43:55 | 2019.07.08 10:18:44	7	OGT-V	0	P180534	228	8.64531	0.950119	13.6082	0.670382	HIGH	gelding	22
31	1015121968-1	1015121953-1	1015121212	Sample	08-OGT-I-P-pre	161	Juni 2019	P180534	30	10	2019.07.08 11:13:52 | 2019.07.05 02:39:57 | 2019.07.05 02:36:11	8	OGT-I	0	P180534	235	8.64531	1.04167	14.9626	1.8592	HIGH	female	20
32	1015121968-1	1015121953-1	1015121537	Sample	08-OGT-V-P-+120	164	Juni 2019	P180534	8	10	2019.07.05 04:24:29 | 2019.07.05 04:20:45 | 2019.07.08 13:04:11	8	OGT-V	120	P180534	249	8.54084	0.96875	13.6492	0.748059	HIGH	female	20
33	1015121968-1	1015121953-1	1015121580	Sample	09-OGT-III-P-+120	176	Juni 2019	P180534	68	10	2019.07.08 13:43:36 | 2019.07.05 05:01:53 | 2019.07.05 04:58:08	9	OGT-III	120	P180534	254	8.1777	0.984332	13.0226	1.49007	HIGH	female	20
34	1015121968-1	1015121953-1	1015121454	Sample	10-OGT-II-P-pre	185	Juni 2019	P180534	90	10	2019.07.08 11:53:17 | 2019.07.05 03:13:31 | 2019.07.05 03:17:14	10	OGT-II	0	P180534	240	8.46131	0.993789	13.678	0.57112	HIGH	female	25
35	1015121968-1	1015121953-1	1015121038	Sample	10-OGT-V-P-pre	185	Juni 2019	P180534	87	10	2019.07.08 08:43:58 | 2019.07.05 00:14:22 | 2019.07.05 00:18:06	10	OGT-V	0	P180534	216	8.35971	0.92603	13.4574	0.490126	HIGH	female	25
36	1015121968-1	1015121953-1	1015121469	Sample	11-OGT-III-P-+120	200	Juni 2019	P180534	7	10	2019.07.08 12:01:10 | 2019.07.05 03:20:58 | 2019.07.05 03:24:43	11	OGT-III	120	P180534	241	8.62355	0.98846	14.4762	1.66882	LOW	gelding	17
37	1015121968-1	1015121953-1	1015120969	Sample	11-OGT-V-P-+120	200	Juni 2019	P180534	3	10	2019.07.05 16:23:20 | 2019.07.04 23:25:53 | 2019.07.04 23:22:09	11	OGT-V	120	P180534	209	8.57146	0.953337	13.3573	0.768401	LOW	gelding	17
38	1015121968-1	1015121953-1	1015121095	Sample	12-OGT-III-P-pre	209	Juni 2019	P180534	64	10	2019.07.05 00:59:09 | 2019.07.05 01:02:52 | 2019.07.08 09:31:27	12	OGT-III	0	P180534	222	8.6489	1.01468	16.7774	1.05228	HIGH	female	19
39	1015121968-1	1015121953-1	1015121518	Sample	12-OGT-II-P-+120	212	Juni 2019	P180534	67	10	2019.07.08 12:40:34 | 2019.07.05 03:58:21 | 2019.07.05 04:02:06	12	OGT-II	120	P180534	246	8.60886	0.986842	16.9129	1.15584	HIGH	female	19
40	1015121968-1	1015121953-1	1015120973	Sample	12-OGT-II-P-pre	209	Juni 2019	P180534	15	10	2019.07.05 16:31:13 | 2019.07.04 23:29:38 | 2019.07.04 23:33:22	12	OGT-II	0	P180534	210	8.60886	0.986842	16.9129	1.15584	HIGH	female	19
41	1015121968-1	1015121953-1	1015120988	Sample	12-OGT-V-P-+120	212	Juni 2019	P180534	27	10	2019.07.05 16:39:05 | 2019.07.04 23:37:05 | 2019.07.04 23:40:50	12	OGT-V	120	P180534	211	8.57146	0.961538	16.138	0.675512	HIGH	female	19
42	1015121968-1	1015121953-1	1015121492	Sample	12-OGT-V-P-pre	209	Juni 2019	P180534	43	10	2019.07.05 03:47:08 | 2019.07.05 03:43:23 | 2019.07.08 12:24:49	12	OGT-V	0	P180534	244	8.57146	0.961538	16.138	0.675512	HIGH	female	19
43	1015121968-1	1015121953-1	1015121106	Sample	13-OGT-II-P-+120	224	Juni 2019	P180534	76	10	2019.07.08 09:39:21 | 2019.07.05 01:06:36 | 2019.07.05 01:10:19	13	OGT-II	120	P180534	223	8.35971	1.03797	14.3879	1.99724	HIGH	female	24
44	1015121968-1	1015121953-1	1015121057	Sample	13-OGT-I-P-+120	224	Juni 2019	P180534	16	10	2019.07.08 08:59:57 | 2019.07.05 00:33:01 | 2019.07.05 00:29:18	13	OGT-I	120	P180534	218	8.47352	1.12342	13.6837	1.22585	HIGH	female	24
45	1015121968-1	1015121953-1	1015120940	Sample	13-OGT-IV-P-pre	221	Juni 2019	P180534	74	10	2019.07.04 23:07:14 | 2019.07.04 23:10:57 | 2019.07.05 16:07:37	13	OGT-IV	0	P180534	207	8.25987	0.968354	12.5458	0.557011	HIGH	female	24
46	1015121968-1	1015121953-1	1015121178	Sample	15-OGT-II-P-+120	248	Juni 2019	P180534	77	10	2019.07.05 02:10:03 | 2019.07.05 02:06:20 | 2019.07.08 10:42:20	15	OGT-II	120	P180534	231	8.73261	1.05094	13.3578	1.05937	LOW	gelding	9
47	1015121968-1	1015121953-1	1015121231	Sample	15-OGT-I-P-pre	245	Juni 2019	P180534	54	10	2019.07.05 02:54:52 | 2019.07.05 02:51:07 | 2019.07.08 11:29:38	15	OGT-I	0	P180534	237	8.69832	1.02621	12.5423	0.601884	LOW	gelding	9
48	1015121968-1	1015121953-1	1015121197	Sample	15-OGT-V-P-pre	245	Juni 2019	P180534	6	10	2019.07.05 02:21:15 | 2019.07.05 02:24:59 | 2019.07.08 10:58:06	15	OGT-V	0	P180534	233	8.63447	0.981701	13.6355	1.28417	LOW	gelding	9
49	1015121968-1	1015121953-1	1015121081	Sample	16-OGT-IV-P-pre	257	Juni 2019	P180534	52	10	2019.07.08 09:23:34 | 2019.07.05 00:55:25 | 2019.07.05 00:51:40	16	OGT-IV	0	P180534	221	8.5447	0.938601	12.9599	1.06682	LOW	gelding	17
50	1015121968-1	1015121953-1	1015120954	Sample	17-OGT-III-P-pre	269	Juni 2019	P180534	86	10	2019.07.05 16:15:29 | 2019.07.04 23:18:24 | 2019.07.04 23:14:40	17	OGT-III	0	P180534	208	8.45721	0.954842	14.508	1.1925	LOW	gelding	17
51	1015121968-1	1015121953-1	1015121004	Sample	17-OGT-II-P-pre	269	Juni 2019	P180534	51	10	2019.07.04 23:52:01 | 2019.07.04 23:55:46 | 2019.07.05 16:55:38	17	OGT-II	0	P180534	213	8.60886	1.06094	14.5531	1.23037	LOW	gelding	17
52	1015121968-1	1015121953-1	1015121130	Sample	19-OGT-III-P-+120	284	Juni 2019	P180534	29	10	2019.07.08 10:10:51 | 2019.07.05 01:40:12 | 2019.07.05 01:36:27	19	OGT-III	120	P180534	227	8.70178	1.00775	14.0108	0.744598	HIGH	female	22
53	1015121968-1	1015121953-1	1015121208	Sample	19-OGT-III-P-pre	281	Juni 2019	P180534	18	10	2019.07.05 02:32:28 | 2019.07.05 02:28:44 | 2019.07.08 11:05:58	19	OGT-III	0	P180534	234	8.70178	1.00775	14.0108	0.744598	HIGH	female	22
54	1015121968-1	1015121953-1	1015121541	Sample	19-OGT-I-P-+120	284	Juni 2019	P180534	20	10	2019.07.08 13:12:04 | 2019.07.05 04:28:14 | 2019.07.05 04:31:57	19	OGT-I	120	P180534	250	8.80207	1.08043	15.1309	1.61853	HIGH	female	22
55	1015121968-1	1015121953-1	1015121019	Sample	19-OGT-IV-P-pre	281	Juni 2019	P180534	63	10	2019.07.04 23:59:29 | 2019.07.05 00:03:13 | 2019.07.05 17:04:18	19	OGT-IV	0	P180534	214	8.66319	0.981105	13.2469	0.438477	HIGH	female	22
56	1015121968-1	1015121953-1	1015121182	Sample	20-OGT-I-P-pre	293	Juni 2019	P180534	89	10	2019.07.05 02:13:47 | 2019.07.05 02:17:32 | 2019.07.08 10:50:13	20	OGT-I	0	P180534	232	8.42404	1.11508	13.3724	1.51831	HIGH	female	25
57	1015121968-1	1015121953-1	1015121163	Sample	20-OGT-IV-P-+120	296	Juni 2019	P180534	65	10	2019.07.08 10:34:28 | 2019.07.05 02:02:36 | 2019.07.05 01:58:51	20	OGT-IV	120	P180534	230	8.20724	0.959038	12.0604	0.611393	HIGH	female	25
89	1015121968-1	1015121953-1	721046	QC Level 2	p180_QC2		Juni 2019	P180534	17	10	2019.07.08 10:02:59 | 2019.07.05 01:32:43 | 2019.07.05 01:28:58				P180534	226
90	1015121968-1	1015121953-1	721046	QC Level 2	p180_QC2		Juni 2019	P180534	46	10	2019.07.08 15:34:44 | 2019.07.05 06:47:16 | 2019.07.05 06:43:31				P180534	268
91	1015121968-1	1015121953-1	721046	QC Level 2	p180_QC2		Juni 2019	P180534	50	10	2019.07.05 15:51:53 | 2019.07.04 22:56:02 | 2019.07.04 22:52:18				P180534	205
92	1015121968-1	1015121953-1	721046	QC Level 2	p180_QC2		Juni 2019	P180534	79	10	2019.07.05 04:09:33 | 2019.07.05 04:05:49 | 2019.07.08 12:48:26				P180534	247
93	1015121968-1	1015121953-1	721046	QC Level 2	p180_QC2		Juni 2019	P180534	96	10	2019.07.08 18:12:22 | 2019.07.05 09:14:41 | 2019.07.05 09:18:24				P180534	288
106	1015120921-1	1015120935-1	1015120848	Sample	01-OGT-II-P-+120	80	Juni 2019	P170169	95	10	2019.07.02 20:46:12 | 2019.07.04 00:19:07 | 2019.07.04 00:15:24	1	OGT-II	120	P170169	177	8.2314	1.0395	12.978	1.41884	HIGH	female	29
107	1015120921-1	1015120935-1	1015120765	Sample	01-OGT-II-P-pre	77	Juni 2019	P170169	94	10	2019.07.02 19:42:25 | 2019.07.03 23:13:06 | 2019.07.03 23:16:52	1	OGT-II	0	P170169	169	8.2314	1.0395	12.978	1.41884	HIGH	female	29
108	1015120921-1	1015120935-1	1015120183	Sample	01-OGT-I-P-pre	77	Juni 2019	P170169	27	10	2019.07.02 11:42:23 | 2019.07.03 15:38:40 | 2019.07.03 15:34:56	1	OGT-I	0	P170169	108	8.28317	1.07762	12.6238	1.10992	HIGH	female	29
109	1015120921-1	1015120935-1	1015120301	Sample	01-OGT-IV-P-pre	77	Juni 2019	P170169	76	10	2019.07.03 17:06:07 | 2019.07.03 17:09:50 | 2019.07.02 13:16:47	1	OGT-IV	0	P170169	120	8.15262	0.984061	10.5619	0.265361	HIGH	female	29
110	1015120921-1	1015120935-1	1015120611	Sample	01-OGT-V-P-pre	77	Juni 2019	P170169	92	10	2019.07.02 17:36:28 | 2019.07.03 21:16:29 | 2019.07.03 21:12:43	1	OGT-V	0	P170169	153	7.99228	0.880111	11.7599	0.609719	HIGH	female	29
111	1015120921-1	1015120935-1	1015120145	Sample	02-OGT-II-P-+120	92	Juni 2019	P170169	74	10	2019.07.03 15:05:05 | 2019.07.03 15:08:49 | 2019.07.02 11:10:56	2	OGT-II	120	P170169	104	8.61622	1.03539	15.3214	1.34737	HIGH	female	19
112	1015120921-1	1015120935-1	1015120421	Sample	02-OGT-I-P-+120	92	Juni 2019	P170169	42	10	2019.07.02 14:59:05 | 2019.07.03 18:43:14 | 2019.07.03 18:46:57	2	OGT-I	120	P170169	133	8.62355	1.04068	14.7843	0.928584	HIGH	female	19
113	1015120921-1	1015120935-1	1015120746	Sample	02-OGT-IV-P-+120	92	Juni 2019	P170169	70	10	2019.07.02 19:26:40 | 2019.07.03 22:58:10 | 2019.07.03 23:01:54	2	OGT-IV	120	P170169	167	8.51743	0.966719	14.4937	0.759151	HIGH	female	19
114	1015120921-1	1015120935-1	1015120557	Sample	02-OGT-V-P-+120	92	Juni 2019	P170169	20	10	2019.07.02 16:49:15 | 2019.07.03 20:31:36 | 2019.07.03 20:27:51	2	OGT-V	120	P170169	147	8.49365	0.950872	13.8452	0.484284	HIGH	female	19
120	1015120921-1	1015120935-1	1015120523	Sample	03-OGT-III-P-+120	104	Juni 2019	P170169	67	10	2019.07.02 16:17:46 | 2019.07.03 19:58:00 | 2019.07.03 20:01:43	3	OGT-III	120	P170169	143	8.61622	0.995429	12.2734	0.517612	LOW	stallion	14
121	1015120921-1	1015120935-1	1015120712	Sample	03-OGT-II-P-pre	101	Juni 2019	P170169	22	10	2019.07.02 18:55:09 | 2019.07.03 22:27:26 | 2019.07.03 22:31:12	3	OGT-II	0	P170169	163	8.70869	1.06145	14.0547	1.77952	LOW	stallion	14
122	1015120921-1	1015120935-1	1015120606	Sample	03-OGT-I-P-pre	101	Juni 2019	P170169	80	10	2019.07.02 17:28:36 | 2019.07.03 21:05:16 | 2019.07.03 21:09:00	3	OGT-I	0	P170169	152	8.65964	1.0259	12.7796	0.735216	LOW	stallion	14
123	1015120921-1	1015120935-1	1015120368	Sample	03-OGT-V-P-+120	104	Juni 2019	P170169	65	10	2019.07.03 17:58:23 | 2019.07.03 18:02:08 | 2019.07.02 14:11:52	3	OGT-V	120	P170169	127	8.57146	0.964957	12.8713	0.783483	LOW	stallion	14
124	1015120921-1	1015120935-1	1015120266	Sample	04-OGT-I-P-+120	116	Juni 2019	P170169	28	10	2019.07.03 16:39:59 | 2019.07.03 16:36:16 | 2019.07.02 12:45:19	4	OGT-I	120	P170169	116	8.60516	1.0611	15.6745	1.2518	HIGH	gelding	18
125	1015120921-1	1015120935-1	1015120561	Sample	04-OGT-IV-P-+120	116	Juni 2019	P170169	32	10	2019.07.02 16:57:07 | 2019.07.03 20:39:06 | 2019.07.03 20:35:20	4	OGT-IV	120	P170169	148	8.49365	0.981997	14.2593	0.469368	HIGH	gelding	18
126	1015120921-1	1015120935-1	1015120489	Sample	04-OGT-V-P-pre	113	Juni 2019	P170169	19	10	2019.07.02 15:46:17 | 2019.07.03 19:28:03 | 2019.07.03 19:31:47	4	OGT-V	0	P170169	139	8.43657	0.943808	14.3453	0.498227	HIGH	gelding	18
127	1015120921-1	1015120935-1	1015120315	Sample	05-OGT-II-P-pre	125	Juni 2019	P170169	88	10	2019.07.02 13:24:39 | 2019.07.03 17:13:35 | 2019.07.03 17:17:19	5	OGT-II	0	P170169	121	8.50955	1.05202	13.0365	1.76659	HIGH	gelding	14
128	1015120921-1	1015120935-1	1015120625	Sample	05-OGT-I-P-+120	128	Juni 2019	P170169	9	10	2019.07.03 21:20:12 | 2019.07.03 21:23:57 | 2019.07.02 17:44:20	5	OGT-I	120	P170169	154	8.50955	1.05202	11.5823	0.64446	HIGH	gelding	14
129	1015120921-1	1015120935-1	1015120228	Sample	05-OGT-I-P-pre	125	Juni 2019	P170169	75	10	2019.07.03 16:04:48 | 2019.07.03 16:08:31 | 2019.07.02 12:13:52	5	OGT-I	0	P170169	112	8.50955	1.05202	11.5823	0.64446	HIGH	gelding	14
130	1015120921-1	1015120935-1	1015120595	Sample	06-OGT-III-P-+120	140	Juni 2019	P170169	68	10	2019.07.02 17:20:44 | 2019.07.03 20:57:47 | 2019.07.03 21:01:31	6	OGT-III	120	P170169	151	8.63447	1.0232	15.6626	1.29931	HIGH	female	24
131	1015120921-1	1015120935-1	1015120290	Sample	06-OGT-III-P-pre	137	Juni 2019	P170169	64	10	2019.07.02 13:08:55 | 2019.07.03 16:58:38 | 2019.07.03 17:02:23	6	OGT-III	0	P170169	119	8.63447	1.0232	15.6626	1.29931	HIGH	female	24
132	1015120921-1	1015120935-1	1015120659	Sample	06-OGT-IV-P-+120	140	Juni 2019	P170169	45	10	2019.07.02 18:07:57 | 2019.07.03 21:46:22 | 2019.07.03 21:42:37	6	OGT-IV	120	P170169	157	8.65607	1.03866	14.8423	0.73582	HIGH	female	24
133	1015120921-1	1015120935-1	1015120504	Sample	06-OGT-V-P-+120	140	Juni 2019	P170169	43	10	2019.07.03 19:46:45 | 2019.07.03 19:43:02 | 2019.07.02 16:02:02	6	OGT-V	120	P170169	141	8.50559	0.935567	14.6165	0.629218	HIGH	female	24
134	1015120921-1	1015120935-1	1015120198	Sample	07-OGT-III-P-pre	149	Juni 2019	P170169	39	10	2019.07.03 15:42:23 | 2019.07.03 15:46:07 | 2019.07.02 11:50:15	7	OGT-III	0	P170169	109	8.7224	1.00238	14.2229	1.02646	HIGH	gelding	22
135	1015120921-1	1015120935-1	1015120251	Sample	07-OGT-V-P-+120	152	Juni 2019	P170169	16	10	2019.07.03 16:28:46 | 2019.07.03 16:32:32 | 2019.07.02 12:37:27	7	OGT-V	120	P170169	115	8.64531	0.950119	13.6082	0.670382	HIGH	gelding	22
136	1015120921-1	1015120935-1	1015120731	Sample	08-OGT-III-P-+120	164	Juni 2019	P170169	58	10	2019.07.02 19:18:47 | 2019.07.03 22:50:41 | 2019.07.03 22:54:25	8	OGT-III	120	P170169	166	8.52918	0.960938	14.5982	1.4442	HIGH	female	20
137	1015120921-1	1015120935-1	1015120320	Sample	08-OGT-III-P-pre	161	Juni 2019	P170169	5	10	2019.07.02 13:32:31 | 2019.07.03 17:21:02 | 2019.07.03 17:24:45	8	OGT-III	0	P170169	122	8.52918	0.960938	14.5982	1.4442	HIGH	female	20
138	1015120921-1	1015120935-1	1015120916	Sample	08-OGT-II-P-+120	164	Juni 2019	P170169	84	10	2019.07.02 21:41:23 | 2019.07.04 01:12:20 | 2019.07.04 01:08:36	8	OGT-II	120	P170169	184	8.6272	1.02865	12.9418	0.458109	HIGH	female	20
139	1015120921-1	1015120935-1	1015120678	Sample	08-OGT-II-P-pre	161	Juni 2019	P170169	69	10	2019.07.03 21:57:34 | 2019.07.03 22:01:18 | 2019.07.02 18:23:41	8	OGT-II	0	P170169	159	8.6272	1.02865	12.9418	0.458109	HIGH	female	20
140	1015120921-1	1015120935-1	1015120630	Sample	08-OGT-IV-P-pre	161	Juni 2019	P170169	21	10	2019.07.03 21:31:24 | 2019.07.03 21:27:41 | 2019.07.02 17:52:12	8	OGT-IV	0	P170169	155	8.58654	1	13.0402	0.490434	HIGH	female	20
141	1015120921-1	1015120935-1	1015120814	Sample	09-OGT-III-P-pre	173	Juni 2019	P170169	59	10	2019.07.03 23:51:23 | 2019.07.03 23:55:06 | 2019.07.02 20:22:34	9	OGT-III	0	P170169	174	8.1777	0.984332	13.0226	1.49007	HIGH	female	20
142	1015120921-1	1015120935-1	1015120474	Sample	09-OGT-II-P-+120	176	Juni 2019	P170169	7	10	2019.07.02 15:38:25 | 2019.07.03 19:20:34 | 2019.07.03 19:24:18	9	OGT-II	120	P170169	138	8.25044	1.03542	12.5437	1.06906	HIGH	female	20
143	1015120921-1	1015120935-1	1015120353	Sample	09-OGT-II-P-pre	173	Juni 2019	P170169	53	10	2019.07.03 17:54:39 | 2019.07.03 17:50:56 | 2019.07.02 14:04:00	9	OGT-II	0	P170169	126	8.25044	1.03542	12.5437	1.06906	HIGH	female	20
144	1015120921-1	1015120935-1	1015120164	Sample	09-OGT-I-P-+120	176	Juni 2019	P170169	3	10	2019.07.03 15:19:59 | 2019.07.03 15:23:44 | 2019.07.02 11:26:39	9	OGT-I	120	P170169	106	8.31065	1.0797	12.7119	1.20133	HIGH	female	20
145	1015120921-1	1015120935-1	1015120697	Sample	09-OGT-I-P-pre	173	Juni 2019	P170169	93	10	2019.07.02 18:39:24 | 2019.07.03 22:16:14 | 2019.07.03 22:12:30	9	OGT-I	0	P170169	161	8.31065	1.0797	12.7119	1.20133	HIGH	female	20
146	1015120921-1	1015120935-1	1015120455	Sample	09-OGT-IV-P-+120	176	Juni 2019	P170169	78	10	2019.07.02 15:22:41 | 2019.07.03 19:09:22 | 2019.07.03 19:05:38	9	OGT-IV	120	P170169	136	8.16772	0.97752	12.0029	0.734775	HIGH	female	20
147	1015120921-1	1015120935-1	1015120829	Sample	09-OGT-IV-P-pre	173	Juni 2019	P170169	71	10	2019.07.02 20:30:27 | 2019.07.03 23:58:51 | 2019.07.04 00:03:23	9	OGT-IV	0	P170169	175	8.16772	0.97752	12.0029	0.734775	HIGH	female	20
148	1015120921-1	1015120935-1	1015120519	Sample	09-OGT-V-P-+120	176	Juni 2019	P170169	55	10	2019.07.02 16:09:54 | 2019.07.03 19:54:16 | 2019.07.03 19:50:31	9	OGT-V	120	P170169	142	8.08531	0.923025	11.4616	0.504765	HIGH	female	20
149	1015120921-1	1015120935-1	1015120886	Sample	10-OGT-III-P-+120	188	Juni 2019	P170169	48	10	2019.07.04 00:45:20 | 2019.07.04 00:49:04 | 2019.07.02 21:17:43	10	OGT-III	120	P170169	181	8.49365	1.01637	15.763	2.42319	HIGH	female	25
150	1015120921-1	1015120935-1	1015120493	Sample	10-OGT-III-P-pre	185	Juni 2019	P170169	31	10	2019.07.03 19:39:18 | 2019.07.03 19:35:33 | 2019.07.02 15:54:10	10	OGT-III	0	P170169	140	8.49365	1.01637	15.763	2.42319	HIGH	female	25
151	1015120921-1	1015120935-1	1015120441	Sample	10-OGT-II-P-+120	188	Juni 2019	P170169	66	10	2019.07.03 19:01:53 | 2019.07.03 18:58:10 | 2019.07.02 15:14:50	10	OGT-II	120	P170169	135	8.46131	0.993789	13.678	0.57112	HIGH	female	25
152	1015120921-1	1015120935-1	1015120417	Sample	10-OGT-I-P-pre	185	Juni 2019	P170169	30	10	2019.07.03 18:35:45 | 2019.07.03 18:39:29 | 2019.07.02 14:51:13	10	OGT-I	0	P170169	132	8.53696	1.04743	14.4963	1.0071	HIGH	female	25
153	1015120921-1	1015120935-1	1015120727	Sample	10-OGT-IV-P-+120	188	Juni 2019	P170169	34	10	2019.07.02 19:03:02 | 2019.07.03 22:39:29 | 2019.07.03 22:34:57	10	OGT-IV	120	P170169	164	8.49365	1.01637	13.5104	0.508461	HIGH	female	25
154	1015120921-1	1015120935-1	1015120784	Sample	10-OGT-IV-P-pre	185	Juni 2019	P170169	23	10	2019.07.02 19:58:58 | 2019.07.03 23:28:07 | 2019.07.03 23:32:39	10	OGT-IV	0	P170169	171	8.49365	1.01637	13.5104	0.508461	HIGH	female	25
155	1015120921-1	1015120935-1	1015120644	Sample	11-OGT-III-P-pre	197	Juni 2019	P170169	33	10	2019.07.03 21:35:07 | 2019.07.03 21:38:53 | 2019.07.02 18:00:04	11	OGT-III	0	P170169	156	8.62355	0.98846	14.4762	1.66882	LOW	gelding	17
156	1015120921-1	1015120935-1	1015120800	Sample	11-OGT-II-P-+120	200	Juni 2019	P170169	47	10	2019.07.03 23:43:53 | 2019.07.03 23:47:37 | 2019.07.02 20:14:42	11	OGT-II	120	P170169	173	8.71899	1.0562	14.1487	1.32994	LOW	gelding	17
157	1015120921-1	1015120935-1	1015120852	Sample	11-OGT-IV-P-+120	200	Juni 2019	P170169	12	10	2019.07.04 00:26:36 | 2019.07.04 00:22:51 | 2019.07.02 20:54:04	11	OGT-IV	120	P170169	178	8.56006	0.94581	13.4513	0.82013	LOW	gelding	17
158	1015120921-1	1015120935-1	1015120232	Sample	11-OGT-IV-P-pre	197	Juni 2019	P170169	87	10	2019.07.02 12:21:43 | 2019.07.03 16:15:58 | 2019.07.03 16:12:16	11	OGT-IV	0	P170169	113	8.56006	0.94581	13.4513	0.82013	LOW	gelding	17
159	1015120921-1	1015120935-1	1015120209	Sample	11-OGT-V-P-pre	197	Juni 2019	P170169	51	10	2019.07.02 11:58:07 | 2019.07.03 15:53:35 | 2019.07.03 15:49:52	11	OGT-V	0	P170169	110	8.57146	0.953337	13.3573	0.768401	LOW	gelding	17
160	1015120921-1	1015120935-1	1015120708	Sample	12-OGT-I-P-pre	209	Juni 2019	P170169	10	10	2019.07.03 22:19:59 | 2019.07.03 22:23:43 | 2019.07.02 18:47:17	12	OGT-I	0	P170169	162	8.64531	1.01215	16.9263	1.16668	HIGH	female	19
161	1015120921-1	1015120935-1	1015120372	Sample	13-OGT-V-P-+120	224	Juni 2019	P170169	77	10	2019.07.03 18:09:35 | 2019.07.03 18:05:51 | 2019.07.02 14:19:45	13	OGT-V	120	P170169	128	8.10112	0.867089	12.2314	0.447904	HIGH	female	24
162	1015120921-1	1015120935-1	1015120460	Sample	13-OGT-V-P-pre	221	Juni 2019	P170169	90	10	2019.07.02 15:30:33 | 2019.07.03 19:16:49 | 2019.07.03 19:13:05	13	OGT-V	0	P170169	137	8.10112	0.867089	12.2314	0.447904	HIGH	female	24
163	1015120921-1	1015120935-1	1015120387	Sample	14-OGT-III-P-pre	233	Juni 2019	P170169	89	10	2019.07.03 18:17:04 | 2019.07.03 18:13:20 | 2019.07.02 14:27:36	14	OGT-III	0	P170169	129	8.61989	1.02237	12.1469	0.669466	HIGH	female	17
164	1015120921-1	1015120935-1	1015120349	Sample	14-OGT-I-P-+120	236	Juni 2019	P170169	41	10	2019.07.02 13:56:08 | 2019.07.03 17:47:12 | 2019.07.03 17:43:27	14	OGT-I	120	P170169	125	8.65607	1.04839	12.2707	0.729435	HIGH	female	17
165	1015120921-1	1015120935-1	1015120391	Sample	14-OGT-I-P-pre	233	Juni 2019	P170169	6	10	2019.07.02 14:35:28 | 2019.07.03 18:20:47 | 2019.07.03 18:24:32	14	OGT-I	0	P170169	130	8.65607	1.04839	12.2707	0.729435	HIGH	female	17
166	1015120921-1	1015120935-1	1015120179	Sample	14-OGT-V-P-+120	236	Juni 2019	P170169	15	10	2019.07.02 11:34:31 | 2019.07.03 15:31:11 | 2019.07.03 15:27:28	14	OGT-V	120	P170169	107	8.4816	0.92872	12.541	0.879808	HIGH	female	17
167	1015120921-1	1015120935-1	1015120213	Sample	15-OGT-III-P-pre	245	Juni 2019	P170169	63	10	2019.07.03 16:01:04 | 2019.07.03 15:57:19 | 2019.07.02 12:05:59	15	OGT-III	0	P170169	111	8.61254	0.966864	13.5425	1.20406	LOW	gelding	9
168	1015120921-1	1015120935-1	1015120436	Sample	15-OGT-I-P-+120	248	Juni 2019	P170169	54	10	2019.07.03 18:50:41 | 2019.07.03 18:54:26 | 2019.07.02 15:06:57	15	OGT-I	120	P170169	134	8.69832	1.02621	12.5423	0.601884	LOW	gelding	9
169	1015120921-1	1015120935-1	1015120867	Sample	15-OGT-IV-P-pre	245	Juni 2019	P170169	24	10	2019.07.02 21:01:57 | 2019.07.04 00:34:05 | 2019.07.04 00:30:20	15	OGT-IV	0	P170169	179	8.62355	0.974283	13.0411	0.850516	LOW	gelding	9
170	1015120921-1	1015120935-1	1015120751	Sample	16-OGT-II-P-pre	257	Juni 2019	P170169	82	10	2019.07.03 23:09:23 | 2019.07.03 23:05:37 | 2019.07.02 19:34:33	16	OGT-II	0	P170169	168	8.69136	1.03926	12.9319	1.04628	LOW	gelding	17
171	1015120921-1	1015120935-1	1015120150	Sample	16-OGT-I-P-+120	260	Juni 2019	P170169	86	10	2019.07.03 15:12:32 | 2019.07.03 15:16:15 | 2019.07.02 11:18:47	16	OGT-I	120	P170169	105	8.69484	1.04177	12.577	0.818099	LOW	gelding	17
172	1015120921-1	1015120935-1	1015120871	Sample	16-OGT-V-P-+120	260	Juni 2019	P170169	36	10	2019.07.02 21:09:50 | 2019.07.04 00:37:49 | 2019.07.04 00:41:35	16	OGT-V	120	P170169	180	8.61254	0.983895	12.617	0.84109	LOW	gelding	17
173	1015120921-1	1015120935-1	1015120770	Sample	17-OGT-III-P-+120	272	Juni 2019	P170169	11	10	2019.07.02 19:51:05 | 2019.07.03 23:20:36 | 2019.07.03 23:24:21	17	OGT-III	120	P170169	170	8.45721	0.954842	14.508	1.1925	LOW	gelding	17
174	1015120921-1	1015120935-1	1015120334	Sample	17-OGT-II-P-+120	272	Juni 2019	P170169	17	10	2019.07.02 13:40:24 | 2019.07.03 17:28:29 | 2019.07.03 17:32:14	17	OGT-II	120	P170169	123	8.60886	1.06094	14.5531	1.23037	LOW	gelding	17
175	1015120921-1	1015120935-1	1015120891	Sample	17-OGT-I-P-pre	269	Juni 2019	P170169	60	10	2019.07.02 21:25:38 | 2019.07.04 00:56:35 | 2019.07.04 00:52:50	17	OGT-I	0	P170169	182	8.57525	1.03645	13.4266	0.563533	LOW	gelding	17
176	1015120921-1	1015120935-1	1015120901	Sample	17-OGT-IV-P-+120	272	Juni 2019	P170169	72	10	2019.07.02 21:33:30 | 2019.07.04 01:04:04 | 2019.07.04 01:00:19	17	OGT-IV	120	P170169	183	8.46539	0.960283	14.5182	1.20094	LOW	gelding	17
177	1015120921-1	1015120935-1	1015120576	Sample	17-OGT-V-P-pre	269	Juni 2019	P170169	44	10	2019.07.02 17:05:00 | 2019.07.03 20:46:32 | 2019.07.03 20:42:49	17	OGT-V	0	P170169	149	8.50559	0.987486	13.9547	0.812665	LOW	gelding	17
178	1015120921-1	1015120935-1	1015120682	Sample	19-OGT-IV-P-+120	284	Juni 2019	P170169	81	10	2019.07.03 22:05:03 | 2019.07.03 22:08:47 | 2019.07.02 18:31:32	19	OGT-IV	120	P170169	160	8.66319	0.981105	13.2469	0.438477	HIGH	female	22
179	1015120921-1	1015120935-1	1015120581	Sample	19-OGT-V-P-pre	281	Juni 2019	P170169	56	10	2019.07.03 20:54:02 | 2019.07.03 20:50:18 | 2019.07.02 17:12:52	19	OGT-V	0	P170169	150	8.54856	0.906008	14.793	1.28058	HIGH	female	22
180	1015120921-1	1015120935-1	1015120285	Sample	20-OGT-III-P-+120	296	Juni 2019	P170169	52	10	2019.07.03 16:54:54 | 2019.07.03 16:51:11 | 2019.07.02 13:01:03	20	OGT-III	120	P170169	118	8.28317	1.01105	13.0175	1.18713	HIGH	female	25
181	1015120921-1	1015120935-1	1015120833	Sample	20-OGT-II-P-+120	296	Juni 2019	P170169	83	10	2019.07.02 20:38:19 | 2019.07.04 00:11:39 | 2019.07.04 00:07:55	20	OGT-II	120	P170169	176	8.33762	1.05007	13.1839	1.33229	HIGH	female	25
182	1015120921-1	1015120935-1	1015120542	Sample	20-OGT-II-P-pre	293	Juni 2019	P170169	8	10	2019.07.02 16:41:22 | 2019.07.03 20:20:24 | 2019.07.03 20:24:08	20	OGT-II	0	P170169	146	8.33762	1.05007	13.1839	1.33229	HIGH	female	25
183	1015120921-1	1015120935-1	1015120247	Sample	20-OGT-V-P-pre	293	Juni 2019	P170169	4	10	2019.07.03 16:24:15 | 2019.07.03 16:19:43 | 2019.07.02 12:29:35	20	OGT-V	0	P170169	114	8.05856	0.864759	11.26	0.350876	HIGH	female	25
185	1015120921-1	1015120935-1	721046	QC Level 2	p180_QC2		Juni 2019	P170169	29	10	2019.07.02 13:48:15 | 2019.07.03 17:35:58 | 2019.07.03 17:39:43				P170169	124
186	1015120921-1	1015120935-1	721046	QC Level 2	p180_QC2		Juni 2019	P170169	46	10	2019.07.03 22:43:13 | 2019.07.03 22:46:58 | 2019.07.02 19:10:54				P170169	165
187	1015120921-1	1015120935-1	721046	QC Level 2	p180_QC2		Juni 2019	P170169	50	10	2019.07.02 10:55:12 | 2019.07.03 14:50:10 | 2019.07.03 14:53:53				P170169	102
188	1015120921-1	1015120935-1	721046	QC Level 2	p180_QC2		Juni 2019	P170169	79	10	2019.07.03 20:09:12 | 2019.07.03 20:05:27 | 2019.07.02 16:25:38				P170169	144
189	1015120921-1	1015120935-1	721046	QC Level 2	p180_QC2		Juni 2019	P170169	96	10	2019.07.02 21:49:15 | 2019.07.04 01:16:06 | 2019.07.04 01:19:51				P170169	185
202	1015119529-1	1015119533-1	1015118587	Sample	01-OGT-III-P-+120	80	Juni 2019	P170168	74	10	2019.06.20 18:04:34 | 2019.06.20 18:00:50 | 2019.06.19 16:18:47	1	OGT-III	120	P170168	8	8.20236	1.01871	13.1478	1.59616	HIGH	female	29
203	1015119529-1	1015119533-1	1015118946	Sample	01-OGT-III-P-pre	77	Juni 2019	P170168	43	10	2019.06.20 22:42:27 | 2019.06.20 22:38:41 | 2019.06.19 21:10:58	1	OGT-III	0	P170168	45	8.20236	1.01871	13.1478	1.59616	HIGH	female	29
204	1015119529-1	1015119533-1	1015118859	Sample	01-OGT-IV-P-+120	80	Juni 2019	P170168	30	10	2019.06.19 20:00:05 | 2019.06.20 21:31:16 | 2019.06.20 21:35:00	1	OGT-IV	120	P170168	36	8.15262	0.984061	10.5619	0.265361	HIGH	female	29
205	1015119529-1	1015119533-1	1015119117	Sample	02-OGT-III-P-+120	92	Juni 2019	P170168	69	10	2019.06.19 23:32:43 | 2019.06.21 00:57:21 | 2019.06.21 00:53:35	2	OGT-III	120	P170168	63	8.57525	1.00634	15.4574	1.48061	HIGH	female	19
206	1015119529-1	1015119533-1	1015118591	Sample	02-OGT-II-P-pre	89	Juni 2019	P170168	86	10	2019.06.19 16:26:39 | 2019.06.20 18:12:03 | 2019.06.20 18:08:19	2	OGT-II	0	P170168	9	8.61622	1.03539	15.3214	1.34737	HIGH	female	19
207	1015119529-1	1015119533-1	1015119484	Sample	02-OGT-I-P-pre	89	Juni 2019	P170168	48	10	2019.06.21 03:38:27 | 2019.06.21 03:42:12 | 2019.06.20 02:25:59	2	OGT-I	0	P170168	85	8.62355	1.04068	14.7843	0.928584	HIGH	female	19
208	1015119529-1	1015119533-1	1015119500	Sample	02-OGT-IV-P-pre	89	Juni 2019	P170168	72	10	2019.06.21 03:53:27 | 2019.06.21 03:57:13 | 2019.06.20 02:41:45	2	OGT-IV	0	P170168	87	8.51743	0.966719	14.4937	0.759151	HIGH	female	19
214	1015119529-1	1015119533-1	1015119465	Sample	03-OGT-III-P-pre	101	Juni 2019	P170168	24	10	2019.06.20 02:10:14 | 2019.06.21 03:27:14 | 2019.06.21 03:23:28	3	OGT-III	0	P170168	83	8.61622	0.995429	12.2734	0.517612	LOW	stallion	14
215	1015119529-1	1015119533-1	1015118757	Sample	03-OGT-II-P-+120	104	Juni 2019	P170168	88	10	2019.06.19 18:33:27 | 2019.06.20 20:08:54 | 2019.06.20 20:12:39	3	OGT-II	120	P170168	25	8.70869	1.06145	14.0547	1.77952	LOW	stallion	14
216	1015119529-1	1015119533-1	1015119359	Sample	03-OGT-IV-P-pre	101	Juni 2019	P170168	82	10	2019.06.21 02:04:46 | 2019.06.21 02:01:00 | 2019.06.20 00:43:35	3	OGT-IV	0	P170168	72	8.5524	0.95226	13.4672	1.18417	LOW	stallion	14
217	1015119529-1	1015119533-1	1015118908	Sample	03-OGT-V-P-pre	101	Juni 2019	P170168	90	10	2019.06.19 20:39:29 | 2019.06.20 22:08:44 | 2019.06.20 22:12:28	3	OGT-V	0	P170168	41	8.57146	0.964957	12.8713	0.783483	LOW	stallion	14
218	1015119529-1	1015119533-1	1015118689	Sample	04-OGT-III-P-pre	113	Juni 2019	P170168	4	10	2019.06.19 17:37:31 | 2019.06.20 19:16:30 | 2019.06.20 19:20:15	4	OGT-III	0	P170168	18	8.52136	1.00109	15.4078	1.04053	HIGH	gelding	18
219	1015119529-1	1015119533-1	1015118795	Sample	04-OGT-II-P-+120	116	Juni 2019	P170168	53	10	2019.06.19 19:12:50 | 2019.06.20 20:50:07 | 2019.06.20 20:46:22	4	OGT-II	120	P170168	30	8.53696	1.012	16.1496	1.74008	HIGH	gelding	18
220	1015119529-1	1015119533-1	1015118693	Sample	04-OGT-I-P-pre	113	Juni 2019	P170168	16	10	2019.06.19 17:45:24 | 2019.06.20 19:23:59 | 2019.06.20 19:27:45	4	OGT-I	0	P170168	19	8.60516	1.0611	15.6745	1.2518	HIGH	gelding	18
221	1015119529-1	1015119533-1	1015119325	Sample	04-OGT-IV-P-pre	113	Juni 2019	P170168	34	10	2019.06.21 01:34:49 | 2019.06.21 01:31:04 | 2019.06.20 00:12:04	4	OGT-IV	0	P170168	68	8.49365	0.981997	14.2593	0.469368	HIGH	gelding	18
222	1015119529-1	1015119533-1	1015119451	Sample	04-OGT-V-P-+120	116	Juni 2019	P170168	12	10	2019.06.21 03:15:59 | 2019.06.21 03:19:43 | 2019.06.20 02:02:21	4	OGT-V	120	P170168	82	8.43657	0.943808	14.3453	0.498227	HIGH	gelding	18
223	1015119529-1	1015119533-1	1015118912	Sample	05-OGT-III-P-pre	125	Juni 2019	P170168	7	10	2019.06.20 22:19:59 | 2019.06.20 22:16:13 | 2019.06.19 20:47:20	5	OGT-III	0	P170168	42	8.43657	1	12.8279	1.52874	HIGH	gelding	14
224	1015119529-1	1015119533-1	1015118927	Sample	05-OGT-II-P-+120	128	Juni 2019	P170168	19	10	2019.06.19 20:55:12 | 2019.06.20 22:23:43 | 2019.06.20 22:27:28	5	OGT-II	120	P170168	43	8.50955	1.05202	13.0365	1.76659	HIGH	gelding	14
225	1015119529-1	1015119533-1	1015118723	Sample	05-OGT-IV-P-+120	128	Juni 2019	P170168	52	10	2019.06.20 19:46:29 | 2019.06.20 19:50:12 | 2019.06.19 18:09:50	5	OGT-IV	120	P170168	22	8.34649	0.939306	11.8613	0.782093	HIGH	gelding	14
226	1015119529-1	1015119533-1	1015119446	Sample	05-OGT-V-P-+120	128	Juni 2019	P170168	95	10	2019.06.21 03:08:28 | 2019.06.21 03:12:13 | 2019.06.20 01:54:29	5	OGT-V	120	P170168	81	8.37281	0.956647	10.3728	0.278114	HIGH	gelding	14
227	1015119529-1	1015119533-1	1015119015	Sample	05-OGT-V-P-pre	125	Juni 2019	P170168	44	10	2019.06.20 23:42:23 | 2019.06.20 23:38:39 | 2019.06.19 22:13:58	5	OGT-V	0	P170168	53	8.37281	0.956647	10.3728	0.278114	HIGH	gelding	14
228	1015119529-1	1015119533-1	1015118882	Sample	06-OGT-II-P-pre	137	Juni 2019	P170168	66	10	2019.06.19 20:23:43 | 2019.06.20 21:53:46 | 2019.06.20 21:57:29	6	OGT-II	0	P170168	39	8.56387	0.974227	15.4149	1.09432	HIGH	female	24
229	1015119529-1	1015119533-1	1015118984	Sample	06-OGT-I-P-pre	137	Juni 2019	P170168	8	10	2019.06.19 21:50:19 | 2019.06.20 23:19:55 | 2019.06.20 23:16:09	6	OGT-I	0	P170168	50	8.6417	1.02835	15.5968	1.24133	HIGH	female	24
230	1015119529-1	1015119533-1	1015118655	Sample	06-OGT-V-P-pre	137	Juni 2019	P170168	63	10	2019.06.20 18:57:48 | 2019.06.20 18:54:03 | 2019.06.19 17:13:54	6	OGT-V	0	P170168	15	8.50559	0.935567	14.6165	0.629218	HIGH	female	24
231	1015119529-1	1015119533-1	1015119034	Sample	07-OGT-III-P-+120	152	Juni 2019	P170168	68	10	2019.06.20 23:57:23 | 2019.06.20 23:53:38 | 2019.06.19 22:29:44	7	OGT-III	120	P170168	55	8.7224	1.00238	14.2229	1.02646	HIGH	gelding	22
232	1015119529-1	1015119533-1	1015118844	Sample	07-OGT-II-P-pre	149	Juni 2019	P170168	18	10	2019.06.19 19:52:12 | 2019.06.20 21:27:31 | 2019.06.20 21:23:47	7	OGT-II	0	P170168	35	8.71213	0.995249	14.2766	1.06545	HIGH	gelding	22
233	1015119529-1	1015119533-1	1015118806	Sample	07-OGT-I-P-+120	152	Juni 2019	P170168	65	10	2019.06.20 20:57:34 | 2019.06.20 20:53:51 | 2019.06.19 19:20:43	7	OGT-I	120	P170168	31	8.81172	1.06651	14.6496	1.37975	HIGH	gelding	22
234	1015119529-1	1015119533-1	1015118719	Sample	07-OGT-IV-P-pre	149	Juni 2019	P170168	40	10	2019.06.20 19:42:43 | 2019.06.20 19:38:59 | 2019.06.19 18:01:57	7	OGT-IV	0	P170168	21	8.69832	0.985748	13.9642	0.857958	HIGH	gelding	22
235	1015119529-1	1015119533-1	1015119431	Sample	08-OGT-I-P-+120	164	Juni 2019	P170168	83	10	2019.06.21 03:04:44 | 2019.06.21 03:00:59 | 2019.06.20 01:46:37	8	OGT-I	120	P170168	80	8.64531	1.04167	14.9626	1.8592	HIGH	female	20
236	1015119529-1	1015119533-1	1015118621	Sample	08-OGT-IV-P-+120	164	Juni 2019	P170168	27	10	2019.06.19 16:50:16 | 2019.06.20 18:35:19 | 2019.06.20 18:30:47	8	OGT-IV	120	P170168	12	8.58654	1	13.0402	0.490434	HIGH	female	20
237	1015119529-1	1015119533-1	1015119102	Sample	08-OGT-V-P-pre	161	Juni 2019	P170168	57	10	2019.06.21 00:49:50 | 2019.06.21 00:46:06 | 2019.06.19 23:24:51	8	OGT-V	0	P170168	62	8.54084	0.96875	13.6492	0.748059	HIGH	female	20
238	1015119529-1	1015119533-1	1015118641	Sample	09-OGT-V-P-pre	173	Juni 2019	P170168	51	10	2019.06.20 18:50:19 | 2019.06.20 18:46:34 | 2019.06.19 17:06:01	9	OGT-V	0	P170168	14	8.08531	0.923025	11.4616	0.504765	HIGH	female	20
239	1015119529-1	1015119533-1	1015118931	Sample	10-OGT-I-P-+120	188	Juni 2019	P170168	31	10	2019.06.19 21:03:06 | 2019.06.20 22:31:12 | 2019.06.20 22:34:58	10	OGT-I	120	P170168	44	8.53696	1.04743	14.4963	1.0071	HIGH	female	25
240	1015119529-1	1015119533-1	1015119068	Sample	10-OGT-V-P-+120	188	Juni 2019	P170168	9	10	2019.06.21 00:16:07 | 2019.06.21 00:19:53 | 2019.06.19 22:53:20	10	OGT-V	120	P170168	58	8.35971	0.92603	13.4574	0.490126	HIGH	female	25
241	1015119529-1	1015119533-1	1015118970	Sample	11-OGT-II-P-pre	197	Juni 2019	P170168	91	10	2019.06.19 21:42:28 | 2019.06.20 23:08:42 | 2019.06.20 23:12:26	11	OGT-II	0	P170168	49	8.71899	1.0562	14.1487	1.32994	LOW	gelding	17
242	1015119529-1	1015119533-1	1015119514	Sample	11-OGT-I-P-+120	200	Juni 2019	P170168	84	10	2019.06.21 04:04:42 | 2019.06.21 04:00:56 | 2019.06.20 02:49:37	11	OGT-I	120	P170168	88	8.71899	1.0562	12.4607	0.412709	LOW	gelding	17
243	1015119529-1	1015119533-1	1015119499	Sample	11-OGT-I-P-pre	197	Juni 2019	P170168	60	10	2019.06.21 03:49:42 | 2019.06.21 03:45:58 | 2019.06.20 02:33:52	11	OGT-I	0	P170168	86	8.71899	1.0562	12.4607	0.412709	LOW	gelding	17
244	1015119529-1	1015119533-1	1015119049	Sample	12-OGT-III-P-+120	212	Juni 2019	P170168	80	10	2019.06.19 22:37:36 | 2019.06.21 00:01:07 | 2019.06.21 00:04:52	12	OGT-III	120	P170168	56	8.6489	1.01468	16.7774	1.05228	HIGH	female	19
245	1015119529-1	1015119533-1	1015118742	Sample	12-OGT-I-P-+120	212	Juni 2019	P170168	76	10	2019.06.19 18:25:35 | 2019.06.20 20:05:10 | 2019.06.20 20:01:27	12	OGT-I	120	P170168	24	8.64531	1.01215	16.9263	1.16668	HIGH	female	19
246	1015119529-1	1015119533-1	1015118897	Sample	12-OGT-IV-P-+120	212	Juni 2019	P170168	78	10	2019.06.20 22:01:15 | 2019.06.20 22:04:59 | 2019.06.19 20:31:36	12	OGT-IV	120	P170168	40	8.66319	1.0248	16.6295	0.949694	HIGH	female	19
247	1015119529-1	1015119533-1	1015119408	Sample	12-OGT-IV-P-pre	209	Juni 2019	P170168	47	10	2019.06.21 02:38:31 | 2019.06.21 02:42:16 | 2019.06.20 01:22:58	12	OGT-IV	0	P170168	77	8.66319	1.0248	16.6295	0.949694	HIGH	female	19
248	1015119529-1	1015119533-1	1015119412	Sample	13-OGT-III-P-+120	224	Juni 2019	P170168	59	10	2019.06.21 02:49:46 | 2019.06.21 02:46:00 | 2019.06.20 01:30:51	13	OGT-III	120	P170168	78	8.31065	1.00316	13.0166	0.771998	HIGH	female	24
249	1015119529-1	1015119533-1	1015119397	Sample	13-OGT-III-P-pre	221	Juni 2019	P170168	35	10	2019.06.20 01:15:06 | 2019.06.21 02:31:02 | 2019.06.21 02:34:47	13	OGT-III	0	P170168	76	8.31065	1.00316	13.0166	0.771998	HIGH	female	24
250	1015119529-1	1015119533-1	1015118674	Sample	13-OGT-II-P-pre	221	Juni 2019	P170168	87	10	2019.06.19 17:29:39 | 2019.06.20 19:12:46 | 2019.06.20 19:09:01	13	OGT-II	0	P170168	17	8.35971	1.03797	14.3879	1.99724	HIGH	female	24
251	1015119529-1	1015119533-1	1015118878	Sample	13-OGT-I-P-pre	221	Juni 2019	P170168	54	10	2019.06.20 21:50:00 | 2019.06.20 21:46:15 | 2019.06.19 20:15:51	13	OGT-I	0	P170168	38	8.47352	1.12342	13.6837	1.22585	HIGH	female	24
252	1015119529-1	1015119533-1	1015119427	Sample	13-OGT-IV-P-+120	224	Juni 2019	P170168	71	10	2019.06.20 01:38:44 | 2019.06.21 02:57:15 | 2019.06.21 02:53:31	13	OGT-IV	120	P170168	79	8.25987	0.968354	12.5458	0.557011	HIGH	female	24
253	1015119529-1	1015119533-1	1015119311	Sample	14-OGT-III-P-+120	236	Juni 2019	P170168	22	10	2019.06.21 01:27:18 | 2019.06.21 01:23:34 | 2019.06.20 00:04:11	14	OGT-III	120	P170168	67	8.61989	1.02237	12.1469	0.669466	HIGH	female	17
254	1015119529-1	1015119533-1	1015119091	Sample	14-OGT-II-P-+120	236	Juni 2019	P170168	45	10	2019.06.21 00:42:20 | 2019.06.21 00:38:37 | 2019.06.19 23:16:58	14	OGT-II	120	P170168	61	8.66675	1.05619	13.9048	2.2645	HIGH	female	17
255	1015119529-1	1015119533-1	1015118811	Sample	14-OGT-II-P-pre	233	Juni 2019	P170168	77	10	2019.06.20 21:05:05 | 2019.06.20 21:01:20 | 2019.06.19 19:28:36	14	OGT-II	0	P170168	32	8.66675	1.05619	13.9048	2.2645	HIGH	female	17
256	1015119529-1	1015119533-1	1015119020	Sample	14-OGT-IV-P-+120	236	Juni 2019	P170168	56	10	2019.06.20 23:49:54 | 2019.06.20 23:46:08 | 2019.06.19 22:21:51	14	OGT-IV	120	P170168	54	8.50559	0.944329	11.5958	0.45679	HIGH	female	17
257	1015119529-1	1015119533-1	1015119378	Sample	14-OGT-IV-P-pre	233	Juni 2019	P170168	11	10	2019.06.21 02:19:47 | 2019.06.21 02:16:01 | 2019.06.20 00:59:20	14	OGT-IV	0	P170168	74	8.50559	0.944329	11.5958	0.45679	HIGH	female	17
258	1015119529-1	1015119533-1	1015119121	Sample	14-OGT-V-P-pre	233	Juni 2019	P170168	81	10	2019.06.19 23:40:34 | 2019.06.21 01:04:50 | 2019.06.21 01:01:07	14	OGT-V	0	P170168	64	8.4816	0.92872	12.541	0.879808	HIGH	female	17
259	1015119529-1	1015119533-1	1015118617	Sample	15-OGT-III-P-+120	248	Juni 2019	P170168	15	10	2019.06.19 16:42:24 | 2019.06.20 18:23:17 | 2019.06.20 18:27:03	15	OGT-III	120	P170168	11	8.61254	0.966864	13.5425	1.20406	LOW	gelding	9
260	1015119529-1	1015119533-1	1015119363	Sample	15-OGT-II-P-pre	245	Juni 2019	P170168	94	10	2019.06.21 02:12:17 | 2019.06.21 02:08:32 | 2019.06.20 00:51:28	15	OGT-II	0	P170168	73	8.73261	1.05094	13.3578	1.05937	LOW	gelding	9
261	1015119529-1	1015119533-1	1015119344	Sample	15-OGT-IV-P-+120	248	Juni 2019	P170168	70	10	2019.06.21 01:57:17 | 2019.06.21 01:53:33 | 2019.06.20 00:35:42	15	OGT-IV	120	P170168	71	8.62355	0.974283	13.0411	0.850516	LOW	gelding	9
262	1015119529-1	1015119533-1	1015118738	Sample	15-OGT-V-P-+120	248	Juni 2019	P170168	64	10	2019.06.20 19:53:58 | 2019.06.20 19:57:43 | 2019.06.19 18:17:42	15	OGT-V	120	P170168	23	8.63447	0.981701	13.6355	1.28417	LOW	gelding	9
263	1015119529-1	1015119533-1	1015118965	Sample	16-OGT-III-P-+120	260	Juni 2019	P170168	67	10	2019.06.20 22:57:27 | 2019.06.20 22:53:42 | 2019.06.19 21:26:42	16	OGT-III	120	P170168	47	8.63084	0.996477	13.1626	1.22771	LOW	gelding	17
264	1015119529-1	1015119533-1	1015118781	Sample	16-OGT-III-P-pre	257	Juni 2019	P170168	41	10	2019.06.20 20:42:36 | 2019.06.20 20:38:52 | 2019.06.19 19:04:57	16	OGT-III	0	P170168	29	8.63084	0.996477	13.1626	1.22771	LOW	gelding	17
265	1015119529-1	1015119533-1	1015119053	Sample	16-OGT-II-P-+120	260	Juni 2019	P170168	92	10	2019.06.21 00:08:38 | 2019.06.21 00:12:22 | 2019.06.19 22:45:28	16	OGT-II	120	P170168	57	8.69136	1.03926	12.9319	1.04628	LOW	gelding	17
266	1015119529-1	1015119533-1	1015118999	Sample	16-OGT-I-P-pre	257	Juni 2019	P170168	20	10	2019.06.20 23:23:40 | 2019.06.20 23:27:24 | 2019.06.19 21:58:12	16	OGT-I	0	P170168	51	8.69484	1.04177	12.577	0.818099	LOW	gelding	17
267	1015119529-1	1015119533-1	1015119136	Sample	16-OGT-IV-P-+120	260	Juni 2019	P170168	93	10	2019.06.19 23:48:27 | 2019.06.21 01:08:36 | 2019.06.21 01:12:19	16	OGT-IV	120	P170168	65	8.5447	0.938601	12.9599	1.06682	LOW	gelding	17
268	1015119529-1	1015119533-1	1015118660	Sample	16-OGT-V-P-pre	257	Juni 2019	P170168	75	10	2019.06.19 17:21:47 | 2019.06.20 19:05:17 | 2019.06.20 19:01:34	16	OGT-V	0	P170168	16	8.61254	0.983895	12.617	0.84109	LOW	gelding	17
269	1015119529-1	1015119533-1	1015119330	Sample	17-OGT-I-P-+120	272	Juni 2019	P170168	58	10	2019.06.20 00:27:49 | 2019.06.21 01:49:48 | 2019.06.21 01:46:02	17	OGT-I	120	P170168	70	8.57525	1.03645	13.4266	0.563533	LOW	gelding	17
270	1015119529-1	1015119533-1	1015118776	Sample	17-OGT-IV-P-pre	269	Juni 2019	P170168	29	10	2019.06.20 20:35:07 | 2019.06.20 20:31:23 | 2019.06.19 18:57:05	17	OGT-IV	0	P170168	28	8.46539	0.960283	14.5182	1.20094	LOW	gelding	17
271	1015119529-1	1015119533-1	1015118761	Sample	17-OGT-V-P-+120	272	Juni 2019	P170168	5	10	2019.06.19 18:41:19 | 2019.06.20 20:16:22 | 2019.06.20 20:20:08	17	OGT-V	120	P170168	26	8.50559	0.987486	13.9547	0.812665	LOW	gelding	17
272	1015119529-1	1015119533-1	1015118636	Sample	19-OGT-II-P-+120	284	Juni 2019	P170168	39	10	2019.06.20 18:42:50 | 2019.06.20 18:39:04 | 2019.06.19 16:58:08	19	OGT-II	120	P170168	13	8.72581	1.02471	14.3125	0.917819	HIGH	female	22
273	1015119529-1	1015119533-1	1015118602	Sample	19-OGT-II-P-pre	281	Juni 2019	P170168	3	10	2019.06.19 16:34:31 | 2019.06.20 18:15:48 | 2019.06.20 18:19:32	19	OGT-II	0	P170168	10	8.72581	1.02471	14.3125	0.917819	HIGH	female	22
274	1015119529-1	1015119533-1	1015119001	Sample	19-OGT-I-P-pre	281	Juni 2019	P170168	32	10	2019.06.20 23:31:10 | 2019.06.20 23:34:55 | 2019.06.19 22:06:05	19	OGT-I	0	P170168	52	8.80207	1.08043	15.1309	1.61853	HIGH	female	22
275	1015119529-1	1015119533-1	1015118863	Sample	19-OGT-V-P-+120	284	Juni 2019	P170168	42	10	2019.06.20 21:38:45 | 2019.06.20 21:42:31 | 2019.06.19 20:07:58	19	OGT-V	120	P170168	37	8.54856	0.906008	14.793	1.28058	HIGH	female	22
276	1015119529-1	1015119533-1	1015119141	Sample	20-OGT-III-P-pre	293	Juni 2019	P170168	10	10	2019.06.19 23:56:18 | 2019.06.21 01:16:05 | 2019.06.21 01:19:49	20	OGT-III	0	P170168	66	8.28317	1.01105	13.0175	1.18713	HIGH	female	25
277	1015119529-1	1015119533-1	1015119470	Sample	20-OGT-I-P-+120	296	Juni 2019	P170168	36	10	2019.06.20 02:18:06 | 2019.06.21 03:30:58 | 2019.06.21 03:34:43	20	OGT-I	120	P170168	84	8.42404	1.11508	13.3724	1.51831	HIGH	female	25
278	1015119529-1	1015119533-1	1015118830	Sample	20-OGT-IV-P-pre	293	Juni 2019	P170168	6	10	2019.06.19 19:44:19 | 2019.06.20 21:16:16 | 2019.06.20 21:20:01	20	OGT-IV	0	P170168	34	8.20724	0.959038	12.0604	0.611393	HIGH	female	25
279	1015119529-1	1015119533-1	1015119072	Sample	20-OGT-V-P-+120	296	Juni 2019	P170168	21	10	2019.06.19 23:01:13 | 2019.06.21 00:27:22 | 2019.06.21 00:23:37	20	OGT-V	120	P170168	59	8.05856	0.864759	11.26	0.350876	HIGH	female	25
281	1015119529-1	1015119533-1	721046	QC Level 2	p180_QC2		Juni 2019	P170168	17	10	2019.06.20 20:27:37 | 2019.06.20 20:23:52 | 2019.06.19 18:49:12				P170168	27
282	1015119529-1	1015119533-1	721046	QC Level 2	p180_QC2		Juni 2019	P170168	46	10	2019.06.21 01:38:33 | 2019.06.21 01:42:18 | 2019.06.20 00:19:56				P170168	69
283	1015119529-1	1015119533-1	721046	QC Level 2	p180_QC2		Juni 2019	P170168	50	10	2019.06.19 16:03:02 | 2019.06.20 17:49:37 | 2019.06.20 17:45:52				P170168	6
284	1015119529-1	1015119533-1	721046	QC Level 2	p180_QC2		Juni 2019	P170168	79	10	2019.06.19 21:34:35 | 2019.06.20 23:04:57 | 2019.06.20 23:01:11				P170168	48
285	1015119529-1	1015119533-1	721046	QC Level 2	p180_QC2		Juni 2019	P170168	96	10	2019.06.21 04:12:11 | 2019.06.21 04:08:26 | 2019.06.20 02:57:29				P170168	89
298	1015122061-1		1015122037	Sample	02-OGT-III-P-+120	92	Juni 2019		50	10	2019.08.07 21:13:47	2	OGT-III	120		309	8.57525	1.00634	15.4574	1.48061	HIGH	female	19
300	1015122061-1		1015122022	Sample	08-OGT-V-P-pre	161	Juni 2019		39	10	2019.08.07 21:05:53	8	OGT-V	0		308	8.54084	0.96875	13.6492	0.748059	HIGH	female	20
301	1015122061-1		1015121987	Sample	10-OGT-V-P-+120	188	Juni 2019		86	10	2019.08.07 20:34:23	10	OGT-V	120		304	8.35971	0.92603	13.4574	0.490126	HIGH	female	25
302	1015122061-1		1015121972	Sample	11-OGT-II-P-pre	197	Juni 2019		74	10	2019.08.07 20:26:31	11	OGT-II	0		303	8.71899	1.0562	14.1487	1.32994	LOW	gelding	17
303	1015122061-1		1015122018	Sample	14-OGT-II-P-+120	236	Juni 2019		27	10	2019.08.07 20:58:01	14	OGT-II	120		307	8.66675	1.05619	13.9048	2.2645	HIGH	female	17
304	1015122061-1		1015122041	Sample	14-OGT-V-P-pre	233	Juni 2019		63	10	2019.08.07 21:21:41	14	OGT-V	0		310	8.4816	0.92872	12.541	0.879808	HIGH	female	17
305	1015122061-1		1015122056	Sample	16-OGT-IV-P-+120	260	Juni 2019		75	10	2019.08.07 21:29:34	16	OGT-IV	120		311	8.5447	0.938601	12.9599	1.06682	LOW	gelding	17
306	1015122061-1		1015121991	Sample	20-OGT-V-P-+120	296	Juni 2019		3	10	2019.08.07 20:42:16	20	OGT-V	120		305	8.05856	0.864759	11.26	0.350876	HIGH	female	25
308	1015122061-1		721046	QC Level 2	p180_QC2		Juni 2019		51	10	2019.08.07 20:10:47					301
309	1015122061-1		721046	QC Level 2	p180_QC2		Juni 2019		87	10	2019.08.07 21:37:26					312

## Sheet: feature_data
	CV	Class	LOD 1015119529-1	LOD 1015119533-1	LOD 1015120921-1	LOD 1015120935-1	LOD 1015121953-1	LOD 1015121968-1	LOD 1015122061-1	Name	Match	HMDB	PubChem	ChEBI	KEGG	METLIN	SMPDB.ID	Pathway.Name
C0		acylcarnitines	0	12.3	0	16.4	0	3.82	0	Carnitine	L-Carnitine	HMDB0000062	10917	16347	C00318	52	SMP0000030; SMP0000051; SMP0000052; SMP0000465; SMP0000482	Oxidation of Branched-Chain Fatty Acids; Fatty Acid Metabolism; Beta Oxidation of Very Long Chain Fatty Acids; Carnitine Synthesis; Mitochondrial Beta-Oxidation of Long Chain Saturated Fatty Acids
C2	0.0769862	acylcarnitines	0	2.05	0	1.93	0	0.339	0	Acetylcarnitine	L-Acetylcarnitine	HMDB0000201	7045767	57589	C02571	5213	SMP0000030; SMP0000052	Oxidation of Branched-Chain Fatty Acids; Beta Oxidation of Very Long Chain Fatty Acids
C3		acylcarnitines	0	1.03	0	0.894	0	0.216	0	Propionylcarnitine	Propionylcarnitine	HMDB0000824	107738	28867	C03017	5787	SMP0000030	Oxidation of Branched-Chain Fatty Acids
C3-DC (C4-OH)		acylcarnitines	0	2.86	0	2.38	0	0.379	0	Hydroxybutyrylcarnitine	Hydroxybutyrylcarnitine	HMDB0013127	53481617
C3-OH		acylcarnitines	0	1.46	0	1.09	0	0.262	0	Hydroxypropionylcarnitine	Hydroxypropionylcarnitine	HMDB0013125	53481613
C3:1		acylcarnitines	0	0.325	0	0.278	0	0.102	0	Propenoylcarnitine	Propenoylcarnitine	HMDB0013124	53481611	86076
C4		acylcarnitines	0	0.928	0	0.909	0	0.22	0	Butyrylcarnitine	Butyrylcarnitine	HMDB0002013	213144	21949	C02862	6436
C4:1		acylcarnitines	0	0.752	0	0.79	0	0.134	0	Butenoylcarnitine	Butenylcarnitine	HMDB0013126	53481615
C5		acylcarnitines	0	3.53	0	2.79	0	0.321	0	Valerylcarnitine	Valerylcarnitine	HMDB0013128	16226475	85095
C5-DC (C6-OH)		acylcarnitines	0	2.11	0	1.78	0	0.23	0	Glutarylcarnitine	Glutarylcarnitine	HMDB0013130	71317118	82952
C5-M-DC		acylcarnitines	0	2.57	0	2.28	0	0.249	0	Methylglutarylcarnitine	3-Methylglutarylcarnitine	HMDB0000552	128145	70857		5536
C5-OH (C3-DC-M)		acylcarnitines	0	2.51	0	2.04	0	0.308	0	Hydroxyvalerylcarnitine	Hydroxyvalerylcarnitine	HMDB0013132	53481626
C5:1		acylcarnitines	0	0.772	0	0.836	0	0.123	0	Tiglylcarnitine	Tiglylcarnitine	HMDB0002366	91825636	85520		6648
C5:1-DC		acylcarnitines	0	2.29	0	1.96	0	0.243	0	Glutaconylcarnitine	Glutaconylcarnitine	HMDB0013129	53481620
C6 (C4:1-DC)		acylcarnitines	0	0.57	0	0.714	0	0.156	0	Hexanoylcarnitine	Hexanoylcarnitine	HMDB0000705	6426853	70749		5673
C6:1		acylcarnitines	0	0.333	0	0.463	0	0.103	0	Hexenoylcarnitine	2-Hexenoylcarnitine	HMDB0013161	53481638
C7-DC		acylcarnitines	0	0.817	0	0.886	0	0.17	0	Pimelylcarnitine	Pimelylcarnitine	HMDB0013328	53481675	85525
C8		acylcarnitines	0	0.883	0	1.12	0	0.254	0	Octanoylcarnitine	L-Octanoylcarnitine	HMDB0000791	11953814	18102	C02838
C9		acylcarnitines	0	0.362	0	0.444	0	0.126	0	Nonanoylcarnitine	Nonanoylcarnitine	HMDB0013288	53481660	70997
C10		acylcarnitines	0	0.485	0	0.599	0	0.161	0	Decanoylcarnitine	Decanoylcarnitine	HMDB0000651	10245190	68830		5623
C10:1		acylcarnitines	0	0.174	0	0.26	0	0.206	0	Decenoylcarnitine	9-Decenoylcarnitine	HMDB0013205	53481651
C10:2		acylcarnitines	0	0.067	0	0.104	0	0.069	0	Decadienylcarnitine	Linoleyl carnitine	HMDB0006469	6450015	84098
C12		acylcarnitines	0	0.388	0	0.411	0	0.127	0	Dodecanoylcarnitine	Dodecanoylcarnitine	HMDB0002250	168381	77086		6573
C12-DC		acylcarnitines	0	0.475	0	0.656	0	1.51	0	Dodecanedioylcarnitine	Dodecanedioylcarnitine	HMDB0013327	53481667
C12:1		acylcarnitines	0	0.184	0	0.227	0	0.169	0	Dodecenoylcarnitine	trans-2-Dodecenoylcarnitine	HMDB0013326	53481667
C14		acylcarnitines	0	0.161	0	0.197	0	0.076	0	Tetradecanoylcarnitine	Tetradecanoylcarnitine	HMDB0005066	53477791	84634
C14:1		acylcarnitines	0	0.046	0	0.08	0	0.027	0	Tetradecenoylcarnitine	cis-5-Tetradecenoylcarnitine	HMDB0002014	22833575	73060		6437
C14:1-OH		acylcarnitines	0	0.083	0	0.121	0	0.042	0	Hydroxytetradecenoylcarnitine	3-Hydroxy-cis-5-tetradecenoylcarnitine	HMDB0013330	53481679	89748
C14:2		acylcarnitines	0	0.054	0	0.081	0	0.017	0	Tetradecadienylcarnitine
C14:2-OH		acylcarnitines	0	0.045	0	0.074	0	0.028	0	Hydroxytetradecadienylcarnitine
C16		acylcarnitines	0	0.099	0	0.143	0	0.043	0	Hexadecanoylcarnitine	L-Palmitoylcarnitine	HMDB0000222	11953816	17490	C02990	5231	SMP0000051	Fatty Acid Metabolism
C16-OH		acylcarnitines	0	0.113	0	0.16	0	0.051	0	Hydroxyhexadecanoylcarnitine	3-Hydroxyhexadecanoylcarnitine	HMDB0013336	53481691
C16:1		acylcarnitines	0	0.076	0	0.13	0	0.038	0	Hexadecenoylcarnitine	9-Hexadecenoylcarnitine	HMDB0013207	53481653	88544
C16:1-OH		acylcarnitines	0	0.082	0	0.126	0	0.032	0	Hydroxyhexadecenoylcarnitine	3-Hydroxy-9-hexadecenoylcarnitine	HMDB0013333	53481685
C16:2		acylcarnitines	0	0.091	0	0.142	0	0.044	0	Hexadecadienylcarnitine	9,12-Hexadecadienoylcarnitine	HMDB0013334	53481687	89745
C16:2-OH		acylcarnitines	0	0.056	0	0.091	0	0.025	0	Hydroxyhexadecadienylcarnitine	3-Hydroxyhexadecadienoylcarnitine	HMDB0013335	53481689
C18		acylcarnitines	0	0.075	0	0.124	0	0.045	0	Octadecanoylcarnitine	Stearoylcarnitine	HMDB0000848	52922056	84644		5811	SMP0000482	Mitochondrial Beta-Oxidation of Long Chain Saturated Fatty Acids
C18:1		acylcarnitines	0	0.075	0	0.112	0	0.041	0	Octadecenoylcarnitine
C18:1-OH		acylcarnitines	0	0.072	0	0.122	0	0.093	0	Hydroxyoctadecenoylcarnitine	3-Hydroxy-11Z-octadecenoylcarnitine	HMDB0013339	53481697
C18:2		acylcarnitines	0	0.103	0	0.139	0	0.028	0	Octadecadienylcarnitine	Hydroxyhexanoycarnitine	HMDB0013131	53481624
Ala	0.0888823	aminoacids	1	0	1	0	1	0	1	Alanine	L-Alanine	HMDB0000161	5950	16977	C00041		SMP0000004; SMP0000029; SMP0000055; SMP0000059; SMP0000063; SMP0000072; SMP0000127	Glycine and Serine Metabolism; Selenoamino Acid Metabolism; Alanine Metabolism; Urea Cycle; Tryptophan Metabolism; Glutamate Metabolism; Glucose-Alanine Cycle
Arg	0.0888372	aminoacids	0.5	0	0.5	0	0.5	0	0.5	Arginine	L-Arginine	HMDB0000517	6322	16467	C00062	5502	SMP0000004; SMP0000020; SMP0000059; SMP0000067	Glycine and Serine Metabolism; Arginine and Proline Metabolism; Urea Cycle; Aspartate Metabolism
Asn	0.0738614	aminoacids	1.5	0	1.5	0	1.5	0	1.5	Asparagine	L-Asparagine	HMDB0000168	6267	17196	C00152	14	SMP0000009; SMP0000067	Ammonia Recycling; Aspartate Metabolism
Asp	0.0991504	aminoacids	1.5	0	1.5	0	1.5	0	1.5	Aspartate	L-Aspartic acid	HMDB0000191	5960	17053	C00049	5206	SMP0000006; SMP0000007; SMP0000009; SMP0000020; SMP0000050; SMP0000059; SMP0000067; SMP0000072; SMP0000129	Tyrosine Metabolism; beta-Alanine Metabolism; Ammonia Recycling; Arginine and Proline Metabolism; Purine Metabolism; Urea Cycle; Aspartate Metabolism; Glutamate Metabolism; Malate-Aspartate Shuttle
Cit	0.103181	aminoacids	1	0	1	0	1	0	1	Citrulline	Citrulline	HMDB0000904	9750	16349	C00327	16	SMP0000020; SMP0000059; SMP0000067	Arginine and Proline Metabolism; Urea Cycle; Aspartate Metabolism
Gln	0.0831003	aminoacids	1.5	0	1.5	0	1.5	0	1.5	Glutamine	L-Glutamine	HMDB0000641	5961	18050	C00064	5614	SMP0000009; SMP0000045; SMP0000046; SMP0000048; SMP0000050; SMP0000059; SMP0000067; SMP0000072; SMP0000126; SMP0000654	Ammonia Recycling; Amino Sugar Metabolism; Pyrimidine Metabolism; Nicotinate and Nicotinamide Metabolism; Purine Metabolism; Urea Cycle; Aspartate Metabolism; Glutamate Metabolism; Phenylacetate Metabolism; Warburg Effect
Glu	0.0909899	aminoacids	2	0	2	0	2	0	2	Glutamate	L-Glutamic acid	HMDB0000148	33032	16015	C00025	5174	SMP0000004; SMP0000006; SMP0000007; SMP0000008; SMP0000009; SMP0000013; SMP0000015; SMP0000016; SMP0000020; SMP0000032; SMP0000037; SMP0000044; SMP0000045; SMP0000048; SMP0000050; SMP0000053; SMP0000055; SMP0000059; SMP0000063; SMP0000067; SMP0000072; SMP0000075; SMP0000127; SMP0000129; SMP0000654	Glycine and Serine Metabolism; Tyrosine Metabolism; beta-Alanine Metabolism; Phenylalanine and Tyrosine Metabolism; Ammonia Recycling; Cysteine Metabolism; Glutathione Metabolism; Propanoate Metabolism; Arginine and Proline Metabolism; Valine, Leucine, and Isoleucine Degradation; Lysine Degradation; Histidine Metabolism; Amino Sugar Metabolism; Nicotinate and Nicotinamide Metabolism; Purine Metab…
Gly	0.0659111	aminoacids	0.5	0	0.5	0	0.5	0	0.5	Glycine	Glycine	HMDB0000123	750	15428	C00037	20	SMP0000004; SMP0000009; SMP0000015; SMP0000020; SMP0000024; SMP0000033; SMP0000035; SMP0000050; SMP0000055; SMP0000072; SMP0000465	Glycine and Serine Metabolism; Ammonia Recycling; Glutathione Metabolism; Arginine and Proline Metabolism; Porphyrin Metabolism; Methionine Metabolism; Bile Acid Biosynthesis; Purine Metabolism; Alanine Metabolism; Glutamate Metabolism; Carnitine Synthesis
His	0.0808737	aminoacids	0.5	0	0.5	0	0.5	0	0.5	Histidine	L-Histidine	HMDB0000177	6274	15971	C00135	21	SMP0000007; SMP0000009; SMP0000044; SMP0000715	beta-Alanine Metabolism; Ammonia Recycling; Histidine Metabolism; Methylhistidine Metabolism
Ile	0.084466	aminoacids	0.5	0	0.5	0	0.5	0	0.5	Isoleucine	L-Isoleucine	HMDB0000172	6306	17191	C00407	5193	SMP0000032	Valine, Leucine, and Isoleucine Degradation
Leu	0.0718855	aminoacids	1.5	0	1.5	0	1.5	0	1.5	Leucine	L-Leucine	HMDB0000687	6106	15603	C00123	24	SMP0000032	Valine, Leucine, and Isoleucine Degradation
Lys	0.0871799	aminoacids	0.5	0	0.5	0	0.5	0	0.5	Lysine	L-Lysine	HMDB0000182	5962	18019	C00047	5200	SMP0000037; SMP0000066; SMP0000465	Lysine Degradation; Biotin Metabolism; Carnitine Synthesis
Met	0.201384	aminoacids	0.1	0	0.1	0	0.1	0	0.1	Methionine	L-Methionine	HMDB0000696	6137	16643	C00073	5664	SMP0000004; SMP0000033; SMP0000123; SMP0000445	Glycine and Serine Metabolism; Methionine Metabolism; Betaine Metabolism; Spermidine and Spermine Biosynthesis
Orn	0.0770635	aminoacids	0.5	0	0.5	0	0.5	0	0.5	Ornithine	Ornithine	HMDB0000214	6262	15729	C00077	27	SMP0000020; SMP0000059; SMP0000445	Arginine and Proline Metabolism; Urea Cycle; Spermidine and Spermine Biosynthesis
Phe	0.088475	aminoacids	0.1	0	0.1	0	0.1	0	0.1	Phenylalanine	L-Phenylalanine	HMDB0000159	6140	17295	C00079	28	SMP0000008	Phenylalanine and Tyrosine Metabolism
Pro	0.0928788	aminoacids	1	0	1	0	1	0	1	Proline	L-Proline	HMDB0000162	145742	17203	C00148	29	SMP0000020	Arginine and Proline Metabolism
Ser	0.0756821	aminoacids	1	0	1	0	1	0	1	Serine	L-Serine	HMDB0000187	5951	17115	C00065	5203	SMP0000004; SMP0000009; SMP0000029; SMP0000033; SMP0000034; SMP0000455; SMP0015056; SMP0015057; SMP0015058; SMP0015059; SMP0015060; SMP0015061; SMP0015062; SMP0015063; SMP0015064; SMP0015065; SMP0015066; SMP0015067; SMP0015068; SMP0015069; SMP0015070; SMP0015071; SMP0015072; SMP0015073; SMP0015074; SMP0015075; SMP0015076; SMP0015077; SMP0015078; SMP0015079; SMP0015080; SMP0015081; SMP0015082; SMP…	Glycine and Serine Metabolism; Ammonia Recycling; Selenoamino Acid Metabolism; Methionine Metabolism; Sphingolipid Metabolism; Homocysteine Degradation; Phosphatidylethanolamine Biosynthesis PE(14:0/14:0); Phosphatidylethanolamine Biosynthesis PE(14:0/14:1(9Z)); Phosphatidylethanolamine Biosynthesis PE(14:0/15:0); Phosphatidylethanolamine Biosynthesis PE(14:0/16:0); Phosphatidylethanolamine Biosy…
Thr	0.0681971	aminoacids	0.5	0	0.5	0	0.5	0	0.5	Threonine	L-Threonine	HMDB0000167	6288	16857	C00188	32	SMP0000452	Threonine and 2-Oxobutanoate Degradation
Trp	0.106997	aminoacids	0.5	0	0.5	0	0.5	0	0.5	Tryptophan	L-Tryptophan	HMDB0000929	6305	16828	C00078	5879	SMP0000063	Tryptophan Metabolism
Tyr	0.100784	aminoacids	0.5	0	0.5	0	0.5	0	0.5	Tyrosine	L-Tyrosine	HMDB0000158	6057	17895	C00082	34	SMP0000006; SMP0000008; SMP0000012; SMP0000716	Tyrosine Metabolism; Phenylalanine and Tyrosine Metabolism; Catecholamine Biosynthesis; Thyroid Hormone Synthesis
Val	0.0655468	aminoacids	0.5	0	0.5	0	0.5	0	0.5	Valine	L-Valine	HMDB0000883	6287	16414	C00183	5842	SMP0000016; SMP0000032	Propanoate Metabolism; Valine, Leucine, and Isoleucine Degradation
Ac-Orn		biogenic amines	0.2	0	0.2	0	0.2	0	0.2	Acetylornithine	N-Acetylornithine	HMDB0003357	439232	16543	C00437
ADMA	0.0771496	biogenic amines	0.08	0	0.08	0	0.08	0	0.08	Asymmetric dimethylarginine	Asymmetric dimethylarginine	HMDB0001539	123831	17929	C03626	6309
alpha-AAA	0.274943	biogenic amines	0.4	0	0.4	0	0.4	0	0.4	alpha-Aminoadipic acid	Aminoadipic acid	HMDB0000510	469	37024	C00956	5496	SMP0000037	Lysine Degradation
c4-OH-Pro		biogenic amines	0.1	0	0.1	0	0.1	0	0.1	cis-4-Hydroxyproline	4-Hydroxyproline	HMDB0000725	5810	18095	C01157	257	SMP0000020	Arginine and Proline Metabolism
Carnosine	0.110457	biogenic amines	0.1	0	0.1	0	0.1	0	0.1	Carnosine	Carnosine	HMDB0000033	439224	15727	C00386	38	SMP0000007; SMP0000044	beta-Alanine Metabolism; Histidine Metabolism
Creatinine	0.0637653	biogenic amines	1	0	1	0	1	0	1	Creatinine	Creatinine	HMDB0000562	588	16737	C00791	8
DOPA		biogenic amines	0.2	0	0.2	0	0.2	0	0.2	DOPA	DL-Dopa	HMDB0000609	836	49168	C00355
Dopamine		biogenic amines	0.1	0	0.1	0	0.1	0	0.1	Dopamine	Dopamine	HMDB0000073	681	18243	C03758	64	SMP0000006; SMP0000012	Tyrosine Metabolism; Catecholamine Biosynthesis
Histamine		biogenic amines	0.01	0	0.01	0	0.01	0	0.01	Histamine	Histamine	HMDB0000870	774	18295	C00388	68	SMP0000044	Histidine Metabolism
Kynurenine	0.063904	biogenic amines	0.3	0	0.3	0	0.3	0	0.3	Kynurenine	L-Kynurenine	HMDB0000684	161166	16946	C00328	72	SMP0000063	Tryptophan Metabolism
Met-SO	0.110173	biogenic amines	0.3	0	0.3	0	0.3	0	0.3	Methionine sulfoxide	Methionine sulfoxide	HMDB0002005	847	49033		6428	SMP0000033	Methionine Metabolism
Nitro-Tyr		biogenic amines	0.3	0	0.3	0	0.3	0	0.3	Nitrotyrosine	3-Nitrotyrosine	HMDB0001904	65124	44454		6383
PEA		biogenic amines	0.02	0	0.02	0	0.02	0	0.02	Phenylethylamine	Phenylethylamine	HMDB0012275	1001	18397	C05332
Putrescine	0.0888983	biogenic amines	0.02	0	0.02	0	0.02	0	0.02	Putrescine	Putrescine	HMDB0001414	1045	17148	C02896	3226	SMP0000033; SMP0000445	Methionine Metabolism; Spermidine and Spermine Biosynthesis
Sarcosine	0.0584948	biogenic amines	0.3	0	0.3	0	0.3	0	0.3	Sarcosine	Sarcosine	HMDB0000271	1088	15611	C00213	51	SMP0000004; SMP0000033	Glycine and Serine Metabolism; Methionine Metabolism
SDMA	0.0930098	biogenic amines	0.03	0	0.03	0	0.03	0	0.03	Symmetric dimethylarginine	Symmetric dimethylarginine	HMDB0003334	169148	25682		6891
Serotonin	0.151414	biogenic amines	0.03	0	0.03	0	0.03	0	0.03	Serotonin	Serotonin	HMDB0000259	5202	28790	C00780	74	SMP0000063	Tryptophan Metabolism
Spermidine		biogenic amines	0.08	0	0.08	0	0.08	0	0.08	Spermidine	Spermidine	HMDB0001257	1102	16610	C00315	254	SMP0000033; SMP0000445	Methionine Metabolism; Spermidine and Spermine Biosynthesis
Spermine		biogenic amines	0.08	0	0.08	0	0.08	0	0.08	Spermine	Spermine	HMDB0001256	1103	15746	C00750	255	SMP0000445	Spermidine and Spermine Biosynthesis
t4-OH-Pro	0.0982949	biogenic amines	0.1	0	0.1	0	0.1	0	0.1	trans-4-Hydroxyproline
Taurine	0.0715593	biogenic amines	0.8	0	0.8	0	0.8	0	0.8	Taurine	Taurine	HMDB0000251	1123	15891	C00245	31	SMP0000021; SMP0000035	Taurine and Hypotaurine Metabolism; Bile Acid Biosynthesis
lysoPC a C14:0		glycerophospholipids	0	13.2	0	12.9	0	14.8	0		LysoPC(14:0)	HMDB0010379	460604	64489	C04230		SMP0000075	Arachidonic Acid Metabolism
lysoPC a C16:0	0.161036	glycerophospholipids	0	0.137	0	0.148	0	0.307	0		LysoPC(16:0)	HMDB0010382	460602	72998	C04230		SMP0000025	Phospholipid Biosynthesis
lysoPC a C16:1	0.133648	glycerophospholipids	0	0.088	0	0.087	0	0.066	0		LysoPC(16:1(9Z))	HMDB0010383	24779461	73851	C04230
lysoPC a C17:0	0.159379	glycerophospholipids	0	0.046	0	0.046	0	0.046	0		LysoPC(17:0)	HMDB0012108	24779463	74340	C04230
lysoPC a C18:0	0.139038	glycerophospholipids	0	0.307	0	0.314	0	0.368	0		LysoPC(18:0)	HMDB0010384	497299	73858	C04230
lysoPC a C18:1	0.151638	glycerophospholipids	0	0.108	0	0.135	0	0.152	0		LysoPC(18:1(9Z))	HMDB0002815	16081932	28610	C04230	184
lysoPC a C18:2	0.13688	glycerophospholipids	0	0.159	0	0.173	0	0.426	0		LysoPC(18:2(9Z,12Z))	HMDB0010386	11005824	28733	C04230
lysoPC a C20:3		glycerophospholipids	0	0.212	0	0.223	0	0.205	0		LysoPC(20:3(5Z,8Z,11Z))	HMDB0010393	53480467	74343	C04230
lysoPC a C20:4	0.153507	glycerophospholipids	0	0.052	0	0.065	0	0.052	0		LysoPC(20:4(5Z,8Z,11Z,14Z))	HMDB0010395	24779476	74344	C04230
lysoPC a C24:0		glycerophospholipids	0	0.276	0	0.213	0	0.083	0		LysoPC(24:0)	HMDB0010405	24779481	86260	C04230
lysoPC a C26:0		glycerophospholipids	0	0.095	0	0.439	0	0.311	0		lysoPC(26:0)	HMDB0029205	131750810
lysoPC a C26:1		glycerophospholipids	0	7.73	0	7.73	0	7.73	0		lysoPC(26:1(5Z))	HMDB0029220	131750814
lysoPC a C28:0	0.406455	glycerophospholipids	0	0.125	0	0.209	0	0.545	0		lysoPC(28:0)	HMDB0029206	131750811
lysoPC a C28:1	0.513508	glycerophospholipids	0	0.086	0	0.289	0	0.035	0		lysoPC(28:1(5Z))	HMDB0029221	131750816
PC aa C24:0		glycerophospholipids	0	0.034	0	0.038	0	0.047	0
PC aa C26:0		glycerophospholipids	0	0.803	0	0.749	0	0.824	0
PC aa C28:1	0.0960939	glycerophospholipids	0	0.047	0	0.037	0	0.048	0		PC(14:1(9Z)/14:0)	HMDB0007899	52922244		C00157		SMP0014245; SMP0015085	Phosphatidylcholine Biosynthesis PC(14:1(9Z)/14:0); Phosphatidylethanolamine Biosynthesis PE(14:1(9Z)/14:0)
PC aa C30:0	0.0782037	glycerophospholipids	0	0.144	0	0.125	0	0.136	0		PC(P-16:0/14:0)	HMDB0011203	52923874	133669
PC aa C30:2	0.421074	glycerophospholipids	0	0.006	0	0.014	0	0.014	0		PC(16:1(9Z)/14:1(9Z))	HMDB0007999	52922434	86415	C00157		SMP0014333; SMP0015173	Phosphatidylcholine Biosynthesis PC(16:1(9Z)/14:1(9Z)); Phosphatidylethanolamine Biosynthesis PE(16:1(9Z)/14:1(9Z))
PC aa C32:0	0.102565	glycerophospholipids	0	0.034	0	0.054	0	0.055	0		PC(16:0/16:0)	HMDB0000564	452110	72999	C00157	5548	SMP0000025; SMP0014306; SMP0015146	Phospholipid Biosynthesis; Phosphatidylcholine Biosynthesis PC(16:0/16:0); Phosphatidylethanolamine Biosynthesis PE(16:0/16:0)
PC aa C32:1	0.116004	glycerophospholipids	0	0.019	0	0.065	0	0.056	0		PC(14:0/P-18:1(11Z))	HMDB0007897	53478619	89586	C00157
PC aa C32:2	0.122051	glycerophospholipids	0	0.011	0	0.018	0	0.011	0		PC(16:1(9Z)/16:1(9Z))	HMDB0008002	24778764	83717	C00157		SMP0014336; SMP0015176	Phosphatidylcholine Biosynthesis PC(16:1(9Z)/16:1(9Z)); Phosphatidylethanolamine Biosynthesis PE(16:1(9Z)/16:1(9Z))
PC aa C32:3	0.103894	glycerophospholipids	0	0.017	0	0.011	0	0.016	0		PC(14:1(9Z)/18:2(9Z,12Z))	HMDB0007907	52922264		C00157		SMP0014253; SMP0015093	Phosphatidylcholine Biosynthesis PC(14:1(9Z)/18:2(9Z,12Z)); Phosphatidylethanolamine Biosynthesis PE(14:1(9Z)/18:2(9Z,12Z))
PC aa C34:1	0.115843	glycerophospholipids	0	0.031	0	0.104	0	0.087	0		PC(14:0/20:1(11Z))	HMDB0007879	52922226		C00157		SMP0014229; SMP0015069	Phosphatidylcholine Biosynthesis PC(14:0/20:1(11Z)); Phosphatidylethanolamine Biosynthesis PE(14:0/20:1(11Z))
PC aa C34:2	0.0957012	glycerophospholipids	0	0.02	0	0.095	0	0.239	0		PC(14:0/20:2(11Z,14Z))	HMDB0007880	52922228		C00157		SMP0014230; SMP0015070	Phosphatidylcholine Biosynthesis PC(14:0/20:2(11Z,14Z)); Phosphatidylethanolamine Biosynthesis PE(14:0/20:2(11Z,14Z))
PC aa C34:3	0.117382	glycerophospholipids	0	0.034	0	0.064	0	0.058	0		PC(14:0/20:3(8Z,11Z,14Z))	HMDB0007882	52922230		C00157		SMP0014232; SMP0015072	Phosphatidylcholine Biosynthesis PC(14:0/20:3(8Z,11Z,14Z)); Phosphatidylethanolamine Biosynthesis PE(14:0/20:3(8Z,11Z,14Z))
PC aa C34:4	0.122743	glycerophospholipids	0	0.241	0	0.101	0	0.06	0		PC(14:0/20:4(8Z,11Z,14Z,17Z))	HMDB0007884	53478607		C00157		SMP0014234; SMP0015074	Phosphatidylcholine Biosynthesis PC(14:0/20:4(8Z,11Z,14Z,17Z)); Phosphatidylethanolamine Biosynthesis PE(14:0/20:4(8Z,11Z,14Z,17Z))
PC aa C36:0		glycerophospholipids	0	0.493	0	0.486	0	0.372	0		PC(14:0/22:0)	HMDB0007886	24778638	86107	C00157		SMP0014236; SMP0015076	Phosphatidylcholine Biosynthesis PC(14:0/22:0); Phosphatidylethanolamine Biosynthesis PE(14:0/22:0)
PC aa C36:1	0.102411	glycerophospholipids	0	0.036	0	0.061	0	0.066	0		PC(14:0/22:1(13Z))	HMDB0007887	53478609		C00157		SMP0014237; SMP0015077	Phosphatidylcholine Biosynthesis PC(14:0/22:1(13Z)); Phosphatidylethanolamine Biosynthesis PE(14:0/22:1(13Z))
PC aa C36:2	0.0864715	glycerophospholipids	0	0.053	0	0.107	0	0.159	0		PC(18:1(9Z)/18:1(9Z))	HMDB0000593	6437081	16110	C00157	5572	SMP0014426; SMP0015265	Phosphatidylcholine Biosynthesis PC(18:1(9Z)/18:1(9Z)); Phosphatidylethanolamine Biosynthesis PE(18:1(9Z)/18:1(9Z))
PC aa C36:3	0.090816	glycerophospholipids	0	0.017	0	0.044	0	0.066	0		PC(16:0/20:3(8Z,11Z,14Z))	HMDB0007981	24778719	86121	C00157		SMP0014319; SMP0015159	Phosphatidylcholine Biosynthesis PC(16:0/20:3(8Z,11Z,14Z)); Phosphatidylethanolamine Biosynthesis PE(16:0/20:3(8Z,11Z,14Z))
PC aa C36:4	0.0851537	glycerophospholipids	0	0.038	0	0.029	0	0.102	0		PC(16:0/20:4(5Z,8Z,11Z,14Z))	HMDB0007982	10747814	73003	C00157		SMP0014320; SMP0015160	Phosphatidylcholine Biosynthesis PC(16:0/20:4(5Z,8Z,11Z,14Z)); Phosphatidylethanolamine Biosynthesis PE(16:0/20:4(5Z,8Z,11Z,14Z))
PC aa C36:5	0.0866384	glycerophospholipids	0	0.029	0	0.027	0	0.034	0		PC(16:0/20:5(5Z,8Z,11Z,14Z,17Z))	HMDB0007984	24778723	86137	C00157		SMP0014322; SMP0015162	Phosphatidylcholine Biosynthesis PC(16:0/20:5(5Z,8Z,11Z,14Z,17Z)); Phosphatidylethanolamine Biosynthesis PE(16:0/20:5(5Z,8Z,11Z,14Z,17Z))
PC aa C36:6	0.0828547	glycerophospholipids	0	0.015	0	0.022	0	0.014	0		PC(22:5(4Z,7Z,10Z,13Z,16Z)/14:1(9Z))	HMDB0008657	53479277		C00157		SMP0014912; SMP0015752	Phosphatidylcholine Biosynthesis PC(22:5(4Z,7Z,10Z,13Z,16Z)/14:1(9Z)); Phosphatidylethanolamine Biosynthesis PE(22:5(4Z,7Z,10Z,13Z,16Z)/14:1(9Z))
PC aa C38:0	0.0944254	glycerophospholipids	0	0.056	0	0.046	0	0.039	0		PC(16:0/22:0)	HMDB0007985	24778726	86168	C00157		SMP0014323; SMP0015163	Phosphatidylcholine Biosynthesis PC(16:0/22:0); Phosphatidylethanolamine Biosynthesis PE(16:0/22:0)
PC aa C38:1	0.564544	glycerophospholipids	0	0.081	0	0.069	0	0.03	0		PC(20:0/18:1(9Z))	HMDB0008269	24779038	86171	C00157		SMP0014570; SMP0015410	Phosphatidylcholine Biosynthesis PC(20:0/18:1(9Z)); Phosphatidylethanolamine Biosynthesis PE(20:0/18:1(9Z))
PC aa C38:3	0.108557	glycerophospholipids	0	0.083	0	0.074	0	0.036	0		PC(20:0/18:3(6Z,9Z,12Z))	HMDB0008271	52923067		C00157		SMP0014572; SMP0015412	Phosphatidylcholine Biosynthesis PC(20:0/18:3(6Z,9Z,12Z)); Phosphatidylethanolamine Biosynthesis PE(20:0/18:3(6Z,9Z,12Z))
PC aa C38:4	0.109174	glycerophospholipids	0	0.049	0	0.049	0	0.061	0		PC(18:2(9Z,12Z)/20:2(11Z,14Z))	HMDB0008145	52922743		C00157		SMP0014461; SMP0015301	Phosphatidylcholine Biosynthesis PC(18:2(9Z,12Z)/20:2(11Z,14Z)); Phosphatidylethanolamine Biosynthesis PE(18:2(9Z,12Z)/20:2(11Z,14Z))
PC aa C38:5	0.0990868	glycerophospholipids	0	0.014	0	0.054	0	0.043	0		PC(20:1(11Z)/18:4(6Z,9Z,12Z,15Z))	HMDB0008306	52923121		C00157		SMP0014603; SMP0015443	Phosphatidylcholine Biosynthesis PC(20:1(11Z)/18:4(6Z,9Z,12Z,15Z)); Phosphatidylethanolamine Biosynthesis PE(20:1(11Z)/18:4(6Z,9Z,12Z,15Z))
PC aa C38:6	0.0992446	glycerophospholipids	0	0.04	0	0.01	0	0.036	0		PC(18:2(9Z,12Z)/20:4(5Z,8Z,11Z,14Z))	HMDB0008147	24778979	84563	C00157		SMP0014464; SMP0015304	Phosphatidylcholine Biosynthesis PC(18:2(9Z,12Z)/20:4(5Z,8Z,11Z,14Z)); Phosphatidylethanolamine Biosynthesis PE(18:2(9Z,12Z)/20:4(5Z,8Z,11Z,14Z))
PC aa C40:1		glycerophospholipids	0	0.412	0	0.349	0	0.373	0		PC(24:1(15Z)/16:0)	HMDB0008791	53479493		C00157		SMP0015030; SMP0015870	Phosphatidylcholine Biosynthesis PC(24:1(15Z)/16:0); Phosphatidylethanolamine Biosynthesis PE(24:1(15Z)/16:0)
PC aa C40:2	0.105053	glycerophospholipids	0	0.034	0	0.03	0	0.03	0		PC(20:1(11Z)/20:1(11Z))	HMDB0008308	24779063	86198	C00157		SMP0014605; SMP0015445	Phosphatidylcholine Biosynthesis PC(20:1(11Z)/20:1(11Z)); Phosphatidylethanolamine Biosynthesis PE(20:1(11Z)/20:1(11Z))
PC aa C40:3	0.0931712	glycerophospholipids	0	0.012	0	0.01	0	0.013	0		PC(18:1(9Z)/22:2(13Z,16Z))	HMDB0008119	52922703		C00157		SMP0014441; SMP0015280	Phosphatidylcholine Biosynthesis PC(18:1(9Z)/22:2(13Z,16Z)); Phosphatidylethanolamine Biosynthesis PE(18:1(9Z)/22:2(13Z,16Z))
PC aa C40:4	0.110494	glycerophospholipids	0	0.021	0	0.03	0	0.021	0		PC(22:0/18:4(6Z,9Z,12Z,15Z))	HMDB0008536	52923459		C00157		SMP0014806; SMP0015646	Phosphatidylcholine Biosynthesis PC(22:0/18:4(6Z,9Z,12Z,15Z)); Phosphatidylethanolamine Biosynthesis PE(22:0/18:4(6Z,9Z,12Z,15Z))
PC aa C40:5	0.113175	glycerophospholipids	0	0.027	0	0.035	0	0.008	0		PC(18:0/22:5(4Z,7Z,10Z,13Z,16Z))	HMDB0008055	24778871	73865	C00157		SMP0014385; SMP0015224	Phosphatidylcholine Biosynthesis PC(18:0/22:5(4Z,7Z,10Z,13Z,16Z)); Phosphatidylethanolamine Biosynthesis PE(18:0/22:5(4Z,7Z,10Z,13Z,16Z))
PC aa C40:6	0.103082	glycerophospholipids	0	1.57	0	1.48	0	0.402	0		PC(18:1(9Z)/22:5(4Z,7Z,10Z,13Z,16Z))	HMDB0008121	53478771		C00157		SMP0014443; SMP0015282	Phosphatidylcholine Biosynthesis PC(18:1(9Z)/22:5(4Z,7Z,10Z,13Z,16Z)); Phosphatidylethanolamine Biosynthesis PE(18:1(9Z)/22:5(4Z,7Z,10Z,13Z,16Z))
PC aa C42:0	0.109347	glycerophospholipids	0	0.06	0	0.076	0	0.131	0		PC(22:0/20:0)	HMDB0008537	52923465	86210	C00157		SMP0014807; SMP0015647	Phosphatidylcholine Biosynthesis PC(22:0/20:0); Phosphatidylethanolamine Biosynthesis PE(22:0/20:0)
PC aa C42:1	0.116438	glycerophospholipids	0	0.01	0	0.01	0	0.01	0		PC(18:1(11Z)/24:0)	HMDB0008091	53478753		C00157		SMP0014417; SMP0015256	Phosphatidylcholine Biosynthesis PC(18:1(11Z)/24:0); Phosphatidylethanolamine Biosynthesis PE(18:1(11Z)/24:0)
PC aa C42:2		glycerophospholipids	0	0.587	0	0.451	0	0.188	0		PC(18:1(11Z)/24:1(15Z))	HMDB0008092	53478755		C00157		SMP0014418; SMP0015257	Phosphatidylcholine Biosynthesis PC(18:1(11Z)/24:1(15Z)); Phosphatidylethanolamine Biosynthesis PE(18:1(11Z)/24:1(15Z))
PC aa C42:4	0.113012	glycerophospholipids	0	0.059	0	0.046	0	0.032	0		PC(18:3(6Z,9Z,12Z)/24:1(15Z))	HMDB0008191	53478821	86422	C00157		SMP0014504; SMP0015344	Phosphatidylcholine Biosynthesis PC(18:3(6Z,9Z,12Z)/24:1(15Z)); Phosphatidylethanolamine Biosynthesis PE(18:3(6Z,9Z,12Z)/24:1(15Z))
PC aa C42:5	0.118871	glycerophospholipids	0	0.01	0	0.04	0	0.008	0		PC(20:3(8Z,11Z,14Z)/22:2(13Z,16Z))	HMDB0008415	52923265		C00157		SMP0014701; SMP0015541	Phosphatidylcholine Biosynthesis PC(20:3(8Z,11Z,14Z)/22:2(13Z,16Z)); Phosphatidylethanolamine Biosynthesis PE(20:3(8Z,11Z,14Z)/22:2(13Z,16Z))
PC aa C42:6		glycerophospholipids	0	0.26	0	0.231	0	0.19	0		PC(22:2(13Z,16Z)/20:4(5Z,8Z,11Z,14Z))	HMDB0008607	52923593		C00157		SMP0014870; SMP0015710	Phosphatidylcholine Biosynthesis PC(22:2(13Z,16Z)/20:4(5Z,8Z,11Z,14Z)); Phosphatidylethanolamine Biosynthesis PE(22:2(13Z,16Z)/20:4(5Z,8Z,11Z,14Z))
PC ae C30:0	0.19163	glycerophospholipids	0	0.095	0	0.075	0	0.098	0		PC(o-14:0/16:0)	HMDB0013341	24779275	86223
PC ae C30:1	0.529689	glycerophospholipids	0	0.017	0	0.004	0	0.023	0		PC(o-14:0/16:1(9Z))	HMDB0013402	24779277	86225
PC ae C30:2	0.331262	glycerophospholipids	0	0.011	0	0.011	0	0.011	0		PC(o-16:1(9Z)/14:1(9Z))	HMDB0013410	53481703	86423
PC ae C32:1	0.147189	glycerophospholipids	0	0.018	0	0.026	0	0.073	0		PC(o-16:0/16:1(9Z))	HMDB0013404	52923742
PC ae C32:2	0.142065	glycerophospholipids	0	0.034	0	0.04	0	0.04	0		PC(o-16:1(9Z)/16:1(9Z))	HMDB0013411	53481705	86425
PC ae C34:0	0.103678	glycerophospholipids	0	0.027	0	0.032	0	0.034	0		PC(o-16:0/18:0)	HMDB0013405	11803170	86229
PC ae C34:1	0.116891	glycerophospholipids	0	0.025	0	0.03	0	0.031	0		PC(o-16:1(9Z)/18:0)	HMDB0013412	53481707
PC ae C34:2	0.0895356	glycerophospholipids	0	0.02	0	0.03	0	0.033	0		PC(O-16:0/18:2(9Z,12Z))	HMDB0011151	6443157	86231
PC ae C34:3	0.0913626	glycerophospholipids	0	0.02	0	0.039	0	0.023	0		PC(o-16:1(9Z)/18:2(9Z,12Z))	HMDB0013413	53481709
PC ae C36:0	0.1474	glycerophospholipids	0	0.175	0	0.176	0	0.196	0		PC(o-16:0/20:0)	HMDB0013406	24779297	86240
PC ae C36:1	0.0781333	glycerophospholipids	0	0.187	0	0.144	0	0.073	0		PC(o-16:1(9Z)/20:0)	HMDB0013414	53481711
PC ae C36:2	0.100907	glycerophospholipids	0	0.049	0	0.06	0	0.07	0		PC(o-18:0/18:2(9Z,12Z))	HMDB0013418	6443070
PC ae C36:3	0.113836	glycerophospholipids	0	0.013	0	0.031	0	0.046	0		PC(o-18:1(11Z)/18:2(9Z,12Z))	HMDB0013425	53481721
PC ae C36:4	0.0894129	glycerophospholipids	0	0.023	0	0.03	0	0.058	0		PC(o-16:0/20:4(8Z,11Z,14Z,17Z))	HMDB0013407	53481701
PC ae C36:5	0.103403	glycerophospholipids	0	0.024	0	0.024	0	0.024	0		PC(o-16:1(9Z)/20:4(8Z,11Z,14Z,17Z))	HMDB0013415	53481713
PC ae C38:0	0.0930269	glycerophospholipids	0	0.091	0	0.101	0	0.136	0		PC(o-16:0/22:0)	HMDB0013408	24779301	86243
PC ae C38:1	0.345271	glycerophospholipids	0	0.011	0	0.027	0	0.015	0		PC(o-16:1(9Z)/22:0)	HMDB0013416	53481715
PC ae C38:2	0.118812	glycerophospholipids	0	0.025	0	0.025	0	0.017	0		PC(o-18:1(9Z)/20:1(11Z))	HMDB0013431	53481729
PC ae C38:3	0.0849079	glycerophospholipids	0	0.012	0	0.031	0	0.019	0		PC(o-20:0/18:3(6Z,9Z,12Z))	HMDB0013439	52923834
PC ae C38:4	0.0931083	glycerophospholipids	0	0.129	0	0.099	0	0.111	0		PC(o-18:0/20:4(8Z,11Z,14Z,17Z))	HMDB0013420	6443065	75245
PC ae C38:5	0.0974217	glycerophospholipids	0	0.059	0	0.099	0	0.062	0		PC(o-18:1(9Z)/20:4(8Z,11Z,14Z,17Z))	HMDB0013432	24779379	84827
PC ae C38:6	0.0869098	glycerophospholipids	0	0.023	0	0.012	0	0.007	0		PC(o-16:0/22:6(4Z,7Z,10Z,13Z,16Z,19Z))	HMDB0013409	16759366	86248
PC ae C40:1	0.159838	glycerophospholipids	0	0.052	0	0.06	0	0.028	0		PC(o-18:1(9Z)/22:0)	HMDB0013433	53481731
PC ae C40:2	0.0627515	glycerophospholipids	0	0.025	0	0.022	0	0.024	0		PC(o-18:2(9Z,12Z)/22:0)	HMDB0013437	53481739
PC ae C40:3	0.153512	glycerophospholipids	0	0.018	0	0.052	0	0.024	0		PC(o-22:0/18:3(6Z,9Z,12Z))	HMDB0013445	53481745	89854
PC ae C40:4	0.0741627	glycerophospholipids	0	0.07	0	0.079	0	0.067	0		PC(o-20:0/20:4(8Z,11Z,14Z,17Z))	HMDB0013442	52923852
PC ae C40:5	0.0529766	glycerophospholipids	0	0.017	0	0.017	0	0.011	0		PC(o-20:1(11Z)/20:4(8Z,11Z,14Z,17Z))	HMDB0013444	53481743	89850
PC ae C40:6	0.106359	glycerophospholipids	0	0.028	0	0.037	0	0.035	0		PC(o-18:0/22:6(4Z,7Z,10Z,13Z,16Z,19Z))	HMDB0013422	24779341	86252
PC ae C42:0		glycerophospholipids	0	0.823	0	0.782	0	0.603	0		PC(o-18:0/24:0)	HMDB0013423	53481717
PC ae C42:1		glycerophospholipids	0	0.116	0	0.111	0	0.122	0		PC(o-18:1(9Z)/24:0)	HMDB0013434	53481733
PC ae C42:2	0.119824	glycerophospholipids	0	0.037	0	0.018	0	0.017	0		PC(o-18:2(9Z,12Z)/24:0)	HMDB0013438	53481741
PC ae C42:3	0.0866711	glycerophospholipids	0	0.035	0	0.036	0	0.054	0		PC(o-24:0/18:3(6Z,9Z,12Z))	HMDB0013458	53481771	86451
PC ae C42:4		glycerophospholipids	0	0.167	0	0.167	0	0.167	0		PC(o-22:0/20:4(8Z,11Z,14Z,17Z))	HMDB0013448	53481751
PC ae C42:5		glycerophospholipids	0	1.37	0	1.37	0	0.882	0		PC(o-22:1(13Z)/20:4(8Z,11Z,14Z,17Z))	HMDB0013451	53481757
PC ae C44:3	0.129064	glycerophospholipids	0	0.042	0	0.032	0	0.04	0		PC(o-22:0/22:3(10Z,13Z,16Z))	HMDB0013449	53481753	86454
PC ae C44:4		glycerophospholipids	0	0.096	0	0.097	0	0.106	0		PC(o-22:1(13Z)/22:3(10Z,13Z,16Z))	HMDB0013453	53481761
PC ae C44:5		glycerophospholipids	0	0.119	0	0.119	0	0.075	0		PC(o-22:2(13Z,16Z)/22:3(10Z,13Z,16Z))	HMDB0013456	53481767
PC ae C44:6		glycerophospholipids	0	0.068	0	0.074	0	0.067	0		PC(o-22:0/22:6(4Z,7Z,10Z,13Z,16Z,19Z))	HMDB0013450	53481755
SM (OH) C14:1	0.0891461	sphingolipids	0	0.047	0	0.027	0	0.056	0		SM(d18:0/14:1(9Z)(OH))	HMDB0013462	53481777	90011	C00550
SM (OH) C16:1	0.100589	sphingolipids	0	0.004	0	0.004	0	0.01	0		SM(d18:0/16:1(9Z)(OH))	HMDB0013463	53481779	90007	C00550
SM (OH) C22:1	0.073474	sphingolipids	0	0.015	0	0.018	0	0.048	0		SM(d18:0/22:1(13Z)(OH))	HMDB0013466	53481785	90010	C00550
SM (OH) C22:2	0.100401	sphingolipids	0	0.011	0	0.008	0	0.009	0		SM(d18:0/22:2(13Z,16Z)(OH))	HMDB0013467	53481787	90003	C00550
SM (OH) C24:1	0.09316	sphingolipids	0	0.006	0	0.011	0	0.01	0		SM(d18:0/24:1(15Z)(OH))	HMDB0013469	53481791	90006	C00550
SM C16:0	0.0740699	sphingolipids	0	0.086	0	0.097	0	0.137	0		SM(d18:1/16:0)	HMDB0010169	5283590	17636	C00550
SM C16:1	0.0743192	sphingolipids	0	0.032	0	0.044	0	0.017	0		SM C16:1	HMDB0029216	124202091	89104
SM C18:0	0.112323	sphingolipids	0	0.068	0	0.026	0	0.035	0		SM(d18:0/18:0)	HMDB0012087	44260130		C00550
SM C18:1	0.118003	sphingolipids	0	0.008	0	0.008	0	0.016	0		SM(d18:1/18:1(9Z))	HMDB0012101	6443882	84487	C00550
SM C20:2	0.121876	sphingolipids	0	0.009	0	0.008	0	0.026	0		SM(d18:0/20:2(11Z,14Z))	HMDB0013465	53481783	90009	C00550
SM C22:3	0.300657	sphingolipids	0	0.004	0	0.032	0	0.004	0		SM(d18:0/22:3(10Z,13Z,16Z))	HMDB0013468	53481789	90002	C00550
SM C24:0	0.0856473	sphingolipids	0	0.061	0	0.062	0	0.043	0		SM(d18:0/24:1(15Z))	HMDB0012095	44260133	17636	C00550
SM C24:1	0.105101	sphingolipids	0	0.038	0	0.025	0	0.029	0		SM(d18:1/24:1(15Z))	HMDB0012107	44260126	74535	C00550
SM C26:0	0.218926	sphingolipids	0	0.007	0	0.006	0	0.013	0		SM(d18:1/26:0)	HMDB0011698	5283597		C00550
SM C26:1	0.182938	sphingolipids	0	0.023	0	0.025	0	0.008	0		SM(d18:0/26:1(17Z))	HMDB0013461	44260128	84476	C00550
H1	0.0614554	sugars	0	39.7	0	134	0	45.4	0	Sum of Hexoses (including Glucose)	D-Glucose	HMDB0000122	5793	4167	C00031	133	SMP0000034; SMP0000040; SMP0000043; SMP0000127; SMP0000128; SMP0000444; SMP0000457; SMP0000466; SMP0000654	Sphingolipid Metabolism; Glycolysis; Galactose Metabolism; Glucose-Alanine Cycle; Gluconeogenesis; Lactose Synthesis; Lactose Degradation; Transfer of Acetyl Groups into Mitochondria; Warburg Effect

## Sheet: raw_concentration_data
	10	11	12	13	18	19	20	21	22	23	24	25	26	27	28	29	30	31	32	33	34	35	36	37	38	39	40	41	42	43	44	45	46	47	48	49	50	51	52	53	54	55	56	57	89	90	91	92	93
C0	16.6	8.79	20.7	15.5	29.8	17.1	15.4	11.9	22.2	14.9	11	11.7	14.2	19.1	17.6	22.9	18	16.4	48.7	26.9	13.7	14.4	18.6	14.8	17	22.8	21.3	29.2	29.6	18.7	12.1	14.9	19	17.7	18.7	17	24.7	25.7	22	21	16.4	17.9	12.1	12.8	49.1	56.5	58	57.1	49.8
C2	2.6	1.72	4.06	2.36	7.33	2.08	4.02	4.01	3.18	8.63	1.66	2.28	3.05	3.36	3.72	4.38	2.68	2.96	13.1	4.12	2.45	3.53	3.35	2.65	2.86	3.34	4.92	5.66	7.42	3.06	2.51	4.05	5.61	12.1	5.64	5.03	8.29	7.62	3.32	3.91	3.41	7.59	3.11	3.47	13	15.1	15.5	14.5	13.7
C3	0.349	0.278	0.238	0.265	0.476	0.146	0.176	0.307	0.305	0.136	0.106	0.285	0.166	0.305	0.281	0.151	0.356	0.737	0.727	0.451	0.162	0.281	0.256	0.236	0.259	0.31	0.276	0.385	0.312	0.313	0.225	0.254	0.151	0.204	0.478	0.168	0.18	0.26	0.288	0.376	0.199	0.296	0.145	0.161	4.75	5.51	5.63	5.26	5.02
C3-DC (C4-OH)	0.144	0.131	0.11	0.132	0.12	0.111	0.125	0.112	0.121	0.116	0.124	0.134	0.113	0.139	0.124	0.138	0.126	0.139	0.15	0.115	0.115	0.131	0.125	0.113	0.111	0.126	0.11	0.127	0.15	0.11	0.113	0.116	0.115	0.117	0.119	0.123	0.128	0.119	0.127	0.126	0.125	0.11	0.124	0.119	0.078	0.116	0.107	0.094	0.091
C3-OH	0.09	0.082	0.066	0.077	0.075	0.072	0.077	0.071	0.072	0.073	0.076	0.084	0.071	0.088	0.078	0.085	0.075	0.083	0.089	0.072	0.071	0.08	0.077	0.069	0.065	0.076	0.066	0.076	0.092	0.065	0.068	0.078	0.071	0.076	0.074	0.075	0.079	0.073	0.075	0.073	0.075	0.066	0.076	0.068	0.045	0.07	0.064	0.051	0.051
C3:1	0.044	0.032	0.03	0.035	0.034	0.031	0.032	0.03	0.031	0.033	0.033	0.035	0.031	0.033	0.032	0.036	0.028	0.036	0.037	0.03	0.028	0.038	0.033	0.028	0.033	0.028	0.027	0.032	0.044	0.03	0.031	0.031	0.033	0.032	0.036	0.03	0.033	0.028	0.034	0.033	0.034	0.033	0.032	0.031	0.027	0.04	0.032	0.035	0.03
C4	0.138	0.135	0.302	0.327	0.361	0.133	0.104	0.273	0.33	0.264	0.109	0.114	0.166	0.312	0.195	0.278	0.235	0.545	0.444	0.356	0.202	0.209	0.204	0.17	0.215	0.267	0.345	0.367	0.538	0.301	0.097	0.276	0.292	0.361	0.405	0.3	0.317	0.257	0.207	0.271	0.117	0.26	0.159	0.244	3.64	4.37	4.49	4.17	3.9
C4:1	0.051	0.048	0.04	0.048	0.047	0.042	0.047	0.042	0.046	0.042	0.047	0.051	0.041	0.051	0.048	0.052	0.044	0.05	0.051	0.047	0.041	0.048	0.047	0.041	0.041	0.046	0.038	0.047	0.052	0.045	0.04	0.043	0.044	0.044	0.046	0.044	0.046	0.043	0.047	0.045	0.048	0.042	0.044	0.046	0.04	0.059	0.053	0.048	0.042
C5	0.131	0.11	0.114	0.12	0.17	0.115	0.105	0.108	0.13	0.127	0.11	0.134	0.099	0.125	0.114	0.115	0.113	0.188	0.164	0.143	0.105	0.109	0.113	0.106	0.1	0.11	0.109	0.116	0.135	0.107	0.105	0.139	0.107	0.165	0.172	0.112	0.126	0.127	0.121	0.14	0.113	0.143	0.119	0.111	3.86	4.39	4.07	4.12	3.74
C5-DC (C6-OH)	0.081	0.076	0.061	0.078	0.069	0.075	0.071	0.072	0.07	0.065	0.074	0.081	0.063	0.081	0.074	0.075	0.072	0.078	0.079	0.067	0.069	0.072	0.08	0.073	0.064	0.072	0.065	0.075	0.089	0.068	0.064	0.071	0.071	0.072	0.072	0.072	0.081	0.068	0.085	0.072	0.074	0.066	0.078	0.072	0.07	0.096	0.075	0.076	0.07
C5-M-DC	0.088	0.078	0.067	0.083	0.074	0.083	0.072	0.078	0.079	0.071	0.098	0.083	0.071	0.09	0.078	0.082	0.098	0.085	0.085	0.071	0.076	0.079	0.079	0.074	0.068	0.08	0.075	0.098	0.094	0.074	0.077	0.081	0.075	0.078	0.08	0.074	0.092	0.088	0.085	0.077	0.079	0.071	0.081	0.079	0.028	0.046	0.026	0.033	0.029
C5-OH (C3-DC-M)	0.112	0.099	0.083	0.108	0.093	0.102	0.096	0.102	0.094	0.085	0.099	0.11	0.086	0.111	0.102	0.105	0.096	0.108	0.11	0.093	0.094	0.1	0.105	0.101	0.09	0.103	0.095	0.109	0.117	0.091	0.091	0.106	0.096	0.097	0.098	0.095	0.11	0.093	0.105	0.092	0.1	0.083	0.101	0.094	0.071	0.097	0.085	0.08	0.078
C5:1	0.044	0.043	0.034	0.043	0.035	0.041	0.043	0.039	0.036	0.034	0.038	0.04	0.033	0.043	0.039	0.04	0.038	0.041	0.042	0.037	0.036	0.039	0.039	0.038	0.035	0.037	0.035	0.038	0.045	0.037	0.033	0.04	0.04	0.039	0.037	0.036	0.043	0.037	0.042	0.039	0.035	0.034	0.041	0.035	0.037	0.049	0.041	0.04	0.037
C5:1-DC	0.084	0.075	0.061	0.079	0.069	0.075	0.068	0.069	0.071	0.067	0.072	0.078	0.066	0.078	0.073	0.075	0.072	0.079	0.075	0.066	0.069	0.073	0.075	0.072	0.062	0.072	0.069	0.078	0.086	0.07	0.065	0.074	0.07	0.069	0.071	0.073	0.083	0.067	0.079	0.066	0.074	0.062	0.077	0.074	0.069	0.094	0.08	0.076	0.068
C6 (C4:1-DC)	0.061	0.063	0.051	0.052	0.054	0.055	0.053	0.052	0.049	0.054	0.056	0.06	0.048	0.064	0.054	0.059	0.053	0.06	0.063	0.051	0.05	0.05	0.054	0.051	0.048	0.057	0.058	0.059	0.061	0.049	0.05	0.051	0.063	0.053	0.111	0.054	0.055	0.051	0.056	0.056	0.053	0.053	0.054	0.055	1.97	2.21	2.14	2	2
C6:1	0.039	0.038	0.03	0.032	0.037	0.035	0.032	0.034	0.031	0.033	0.036	0.04	0.031	0.037	0.034	0.039	0.033	0.039	0.04	0.033	0.032	0.036	0.036	0.031	0.032	0.035	0.036	0.041	0.038	0.033	0.033	0.033	0.036	0.036	0.036	0.035	0.035	0.03	0.038	0.036	0.037	0.033	0.036	0.036	0.033	0.042	0.042	0.035	0.035
C7-DC	0.065	0.057	0.056	0.057	0.06	0.054	0.056	0.053	0.053	0.056	0.058	0.065	0.054	0.064	0.055	0.063	0.052	0.064	0.062	0.054	0.051	0.051	0.06	0.048	0.054	0.055	0.054	0.058	0.069	0.051	0.048	0.051	0.059	0.059	0.061	0.054	0.059	0.053	0.064	0.056	0.057	0.052	0.057	0.058	0.053	0.075	0.06	0.064	0.062
C8	0.095	0.087	0.079	0.084	0.087	0.081	0.086	0.079	0.076	0.081	0.083	0.093	0.079	0.096	0.08	0.093	0.078	0.093	0.091	0.078	0.076	0.082	0.086	0.073	0.08	0.08	0.082	0.086	0.1	0.077	0.072	0.079	0.082	0.084	0.126	0.08	0.09	0.082	0.094	0.082	0.084	0.081	0.083	0.087	2.9	3.51	3.4	3.16	3.16
C9	0.045	0.041	0.034	0.036	0.039	0.036	0.039	0.039	0.037	0.033	0.041	0.042	0.035	0.046	0.04	0.043	0.038	0.043	0.041	0.035	0.034	0.039	0.037	0.038	0.036	0.04	0.04	0.037	0.043	0.035	0.037	0.034	0.039	0.04	0.045	0.041	0.042	0.036	0.041	0.036	0.037	0.033	0.038	0.038	0.035	0.045	0.047	0.041	0.037
C10	0.059	0.057	0.045	0.049	0.052	0.05	0.051	0.048	0.047	0.045	0.055	0.058	0.046	0.064	0.052	0.059	0.05	0.057	0.059	0.047	0.041	0.051	0.051	0.048	0.046	0.054	0.05	0.053	0.056	0.047	0.047	0.046	0.053	0.05	0.072	0.05	0.052	0.048	0.051	0.05	0.05	0.044	0.053	0.053	1.69	2.01	2.1	1.97	1.82
C10:1	0.052	0.05	0.025	0.063	0.056	0.061	0.049	0.056	0.063	0.082	0.05	0.067	0.035	0.063	0.065	0.045	0.047	0.031	0.045	0.032	0.086	0.082	0.072	0.045	0.035	0.03	0.035	0.07	0.042	0.056	0.062	0.042	0.063	0.044	0.087	0.054	0.07	0.053	0.031	0.039	0.084	0.046	0.074	0.058	0.095	0.14	0.132	0.096	0.109
C10:2	0.032	0.03	0.032	0.034	0.036	0.032	0.032	0.034	0.048	0.039	0.026	0.02	0.034	0.057	0.021	0.038	0.041	0.044	0.04	0.044	0.035	0.036	0.036	0.038	0.052	0.026	0.037	0.032	0.032	0.026	0.039	0.028	0.046	0.049	0.041	0.04	0.043	0.041	0.03	0.036	0.029	0.025	0.041	0.038	0.039	0.042	0.049	0.034	0.025
C12	0.041	0.042	0.033	0.036	0.038	0.035	0.039	0.037	0.035	0.035	0.037	0.041	0.036	0.046	0.038	0.042	0.036	0.042	0.049	0.035	0.032	0.038	0.035	0.035	0.034	0.039	0.036	0.039	0.04	0.035	0.035	0.039	0.038	0.036	0.222	0.036	0.04	0.035	0.042	0.038	0.037	0.042	0.039	0.037	4.35	5.34	5.6	5.06	4.83
C12-DC	0.463	0.382	0.397	0.36	0.418	0.242	0.443	0.255	0.449	0.405	0.393	0.515	0.361	0.295	0.423	0.465	0.45	0.475	0.396	0.369	0.242	0.415	0.255	0.41	0.421	0.378	0.397	0.405	0.437	0.353	0.374	0.365	0.446	0.285	0.371	0.436	0.271	0.396	0.44	0.257	0.442	0.377	0.386	0.427	0.374	0.415	0.475	0.297	0.395
C12:1	0.071	0.065	0.049	0.061	0.079	0.074	0.087	0.075	0.066	0.073	0.044	0.071	0.062	0.078	0.07	0.08	0.053	0.051	0.084	0.065	0.073	0.07	0.067	0.077	0.068	0.057	0.063	0.055	0.072	0.068	0.045	0.065	0.08	0.078	0.089	0.089	0.083	0.07	0.064	0.062	0.074	0.07	0.078	0.085	0.083	0.107	0.104	0.1	0.091
C14	0.027	0.03	0.024	0.021	0.026	0.02	0.02	0.024	0.02	0.029	0.024	0.024	0.024	0.027	0.021	0.022	0.019	0.029	0.025	0.025	0.02	0.023	0.023	0.022	0.022	0.023	0.023	0.021	0.026	0.022	0.029	0.02	0.031	0.033	0.121	0.025	0.022	0.027	0.037	0.024	0.033	0.04	0.021	0.027	2.18	2.59	2.51	2.57	2.39
C14:1	0.009	0.012	0.01	0.007	0.014	0.009	0.013	0.014	0.011	0.027	0.01	0.011	0.018	0.007	0.01	0.011	0.008	0.012	0.033	0.012	0.01	0.007	0.013	0.011	0.013	0.012	0.01	0.011	0.009	0.01	0.009	0.013	0.011	0.037	0.021	0.012	0.019	0.014	0.011	0.009	0.019	0.03	0.014	0.011	0.034	0.033	0.035	0.04	0.025
C14:1-OH	0.012	0.015	0.016	0.01	0.013	0.011	0.013	0.012	0.012	0.013	0.012	0.012	0.01	0.013	0.011	0.012	0.011	0.013	0.013	0.012	0.009	0.01	0.01	0.01	0.01	0.012	0.014	0.011	0.012	0.011	0.01	0.013	0.013	0.022	0.014	0.014	0.014	0.01	0.013	0.014	0.017	0.012	0.012	0.011	0.012	0.015	0.022	0.016	0.017
C14:2	0.01	0.011	0.009	0.007	0.007	0.008	0.007	0.006	0.01	0.008	0.006	0.009	0.008	0.007	0.01	0.009	0.006	0.009	0.009	0.007	0.008	0.006	0.007	0.006	0.006	0.007	0.008	0.005	0.009	0.009	0.006	0.007	0.009	0.01	0.013	0.011	0.008	0.01	0.007	0.007	0.007	0.007	0.008	0.009	0.017	0.019	0.027	0.021	0.016
C14:2-OH	0.014	0.012	0.013	0.008	0.011	0.012	0.01	0.011	0.012	0.01	0.01	0.01	0.013	0.012	0.013	0.012	0.009	0.013	0.009	0.01	0.011	0.011	0.012	0.01	0.01	0.009	0.012	0.007	0.011	0.008	0.01	0.008	0.008	0.01	0.012	0.008	0.008	0.01	0.011	0.011	0.009	0.011	0.011	0.009	0.013	0.014	0.01	0.013	0.013
C16	0.018	0.019	0.027	0.017	0.033	0.02	0.018	0.02	0.029	0.041	0.013	0.021	0.023	0.016	0.018	0.018	0.016	0.019	0.049	0.022	0.016	0.019	0.02	0.015	0.071	0.018	0.021	0.017	0.02	0.019	0.016	0.029	0.022	0.05	0.205	0.033	0.031	0.027	0.025	0.015	0.025	0.041	0.018	0.017	3.64	4.32	4.31	4.28	3.92
C16-OH	0.016	0.02	0.014	0.016	0.014	0.013	0.016	0.012	0.013	0.015	0.014	0.018	0.012	0.016	0.014	0.016	0.013	0.017	0.016	0.012	0.011	0.014	0.014	0.012	0.013	0.015	0.012	0.015	0.016	0.012	0.013	0.013	0.014	0.015	0.016	0.016	0.014	0.012	0.015	0.013	0.014	0.015	0.015	0.014	0.013	0.021	0.018	0.017	0.016
C16:1	0.011	0.015	0.015	0.01	0.014	0.011	0.012	0.016	0.012	0.019	0.013	0.015	0.017	0.014	0.013	0.015	0.013	0.016	0.024	0.011	0.01	0.012	0.019	0.015	0.013	0.014	0.012	0.016	0.019	0.012	0.013	0.015	0.011	0.036	0.019	0.012	0.02	0.017	0.011	0.012	0.018	0.02	0.014	0.013	0.019	0.023	0.02	0.015	0.019
C16:1-OH	0.012	0.013	0.009	0.009	0.011	0.012	0.011	0.01	0.011	0.01	0.01	0.014	0.01	0.01	0.011	0.011	0.01	0.011	0.011	0.01	0.009	0.009	0.012	0.009	0.01	0.011	0.011	0.01	0.01	0.01	0.008	0.009	0.01	0.012	0.012	0.011	0.009	0.011	0.011	0.011	0.011	0.01	0.013	0.01	0.012	0.021	0.013	0.014	0.015
C16:2	0.015	0.016	0.012	0.012	0.013	0.012	0.012	0.011	0.01	0.01	0.013	0.014	0.013	0.012	0.012	0.011	0.012	0.012	0.015	0.01	0.012	0.01	0.014	0.012	0.011	0.013	0.012	0.012	0.016	0.009	0.011	0.01	0.013	0.01	0.012	0.013	0.013	0.01	0.013	0.011	0.011	0.013	0.014	0.014	0.013	0.014	0.012	0.015	0.011
C16:2-OH	0.01	0.012	0.008	0.008	0.009	0.007	0.009	0.009	0.007	0.008	0.011	0.009	0.009	0.009	0.01	0.008	0.011	0.008	0.009	0.007	0.008	0.007	0.01	0.007	0.007	0.009	0.007	0.008	0.009	0.008	0.009	0.007	0.009	0.011	0.009	0.009	0.007	0.01	0.009	0.008	0.008	0.008	0.009	0.009	0.008	0.012	0.009	0.01	0.01
C18	0.013	0.015	0.013	0.011	0.024	0.018	0.016	0.012	0.014	0.014	0.012	0.014	0.011	0.012	0.01	0.011	0.01	0.023	0.025	0.014	0.014	0.011	0.019	0.01	0.043	0.013	0.013	0.018	0.014	0.012	0.009	0.014	0.015	0.023	0.094	0.016	0.018	0.013	0.013	0.011	0.014	0.022	0.014	0.015	1.7	2.48	2.12	2.02	1.94
C18:1	0.021	0.024	0.043	0.02	0.032	0.023	0.025	0.029	0.032	0.054	0.016	0.022	0.026	0.023	0.018	0.018	0.019	0.029	0.059	0.021	0.028	0.025	0.028	0.026	0.043	0.02	0.034	0.029	0.022	0.021	0.026	0.027	0.037	0.067	0.055	0.039	0.047	0.043	0.018	0.019	0.025	0.036	0.033	0.03	0.069	0.09	0.084	0.079	0.072
C18:1-OH	0.017	0.023	0.022	0.02	0.025	0.011	0.022	0.01	0.02	0.033	0.02	0.021	0.017	0.013	0.03	0.024	0.02	0.028	0.022	0.018	0.014	0.023	0.02	0.024	0.026	0.014	0.021	0.032	0.028	0.021	0.019	0.025	0.019	0.011	0.033	0.024	0.011	0.025	0.024	0.016	0.024	0.02	0.019	0.019	0.018	0.017	0.025	0.015	0.031
C18:2	0.011	0.013	0.011	0.008	0.012	0.009	0.009	0.01	0.01	0.01	0.01	0.012	0.008	0.011	0.009	0.013	0.01	0.01	0.009	0.009	0.01	0.014	0.01	0.007	0.01	0.011	0.01	0.01	0.012	0.01	0.009	0.007	0.008	0.012	0.011	0.009	0.012	0.01	0.01	0.01	0.01	0.013	0.009	0.011	0.05	0.062	0.058	0.053	0.051
Ala	121	112	191	187	137	155	115	191	96.3	77	144	141	183	97.7	103	106	135	148	147	108	154	159	125	110	87.9	119	147	120	120	132	126	111	114	123	160	103	163	136	89	138	116	116	112	105	764	827	746	703	851
Arg	35.1	46.2	91.1	15.9	25.2	47	45.6	57	70.8	56	58.8	25.5	67.3	50.4	13.4	21.1	30.8	83.1	20.1	56.8	63.9	54.2	53.1	7.44	56	50.9	74.7	21.6	14.3	49.6	30.3	63.5	45.6	11.4	19	67.4	96.8	79.1	67.4	108	37.5	57.2	45.6	40	187	217	218	202	203
Asn	12.1	12.8	18.7	18.4	14.5	14.3	11.6	18	11	13.9	15.2	14.7	22.1	13.1	15.3	15.2	25.3	30.2	20.1	16.5	23.8	21	14.5	17.2	16.7	15.2	17.3	17	15.2	14.7	12.2	17.4	13	16.8	24.4	16	18.6	44.7	13.8	31.2	12.3	20.1	15.8	14.7	141	151	149	134	150
Asp	31.7	31.5	11.6	35.1	16.8	13.5	5.15	4.41	4.3	8.78	6.66	43.3	16.1	1.13	26	17.1	48.2	80.3	32.8	4.33	23.8	36.3	8.39	50.4	16.1	7.05	13.7	44.2	55.5	7.49	27.1	6.43	4.23	9.15	80.3	8.34	12.8	9.62	13.1	17.7	33.3	11.2	39.8	25.7	180	162	165	148	177
Cit	35.1	36.2	63.4	49.9	18.8	32.5	35.1	39.3	47.1	43.6	31.5	23.6	45.2	36.7	33.5	30.5	72.7	43.5	25	60.9	39.5	33.6	30.6	28.9	61.5	35.1	43.9	33.4	45	35.2	28.5	46.5	39.9	33.3	46.6	36.3	51.6	37.7	55.1	78.8	28	44.7	46	32.9	162	158	165	141	171
Gln	239	288	254	393	249	260	198	312	172	228	214	220	222	217	282	225	504	334	240	231	334	388	221	276	198	186	199	222	216	225	214	238	190	236	392	241	271	240	254	355	264	264	284	186	629	736	739	684	691
Glu	14.4	17.1	37.9	45.7	26.5	17.5	22	26.1	16.8	23.6	21	24.3	27.5	17.5	21.6	20.6	39.9	50.5	50.9	15.7	27.3	31.1	14.4	20.9	114	22.5	33.7	47.4	40.7	24.1	24.9	30.1	31.9	54.2	98.1	19.8	25.6	24.3	19.1	19.4	23.2	28.7	26.1	25.7	371	382	379	326	401
Gly	577	551	515	590	691	422	396	300	344	244	439	391	539	477	548	743	667	370	576	376	429	432	447	497	495	448	482	534	532	432	459	581	438	630	659	410	345	451	575	614	636	672	340	464	789	903	925	865	849
His	64.4	70.3	65.7	66.8	65.2	43.6	56.5	60.1	57	63.8	49.1	65.2	72.2	52	63.3	53.4	65.2	88.8	68.7	69.8	73.9	66.8	68.2	57.7	66	65.4	75.7	80.4	85.4	67.3	67.6	82	64.3	74.1	92.2	64.9	92.3	77.3	75.6	98.3	63.1	74.8	68.7	56.9	165	194	189	177	184
Ile	29	32.3	48.6	34.7	34.4	45.2	31.4	43.7	37	36.3	32.1	32	57.7	34.6	26.8	31.9	41.7	70.5	48.6	32.6	49.4	48.4	37.9	35.4	43	34.5	55.1	40.1	49.5	35.8	28.1	52.4	40.2	48.7	69.7	37.3	53	48.1	34.1	62.8	42.4	60.5	36.2	47.7	161	186	185	172	167
Leu	23.7	32.3	76	48.7	43.3	37.4	35.8	64.4	52.4	54.6	62.1	41.1	74.6	44.1	30.5	44.5	54.4	110	66.7	50.1	82.8	58.9	47	35.7	72	52.4	88	56.9	67.9	52	33.9	75.5	51.8	71	98.2	57	75.6	66.3	62.8	102	33.5	88.8	44	70.3	182	214	209	200	193
Lys	44.1	41	65.4	49	61.6	47.2	28.8	50.3	52.1	59.1	41.5	52.8	76.6	39	54	50	71.1	70.6	62.7	25.6	77.4	65.6	41.4	58.7	50.2	60.8	80	76.5	82.7	51.8	63.4	80	39.9	63.7	101	70.5	62.3	58.5	30.8	52	70.6	73.6	65.8	65.2	337	370	398	341	380
Met	39.1	33.6	28.6	30.6	24.5	27	17.8	22.8	31.3	27.9	18.9	27.7	33.8	20.2	27	27.3	34.4	36.3	22.6	22.2	26	29	22.5	20.5	18.7	22.2	29.7	26.2	32.9	20.5	22.4	30.5	20.3	21.5	28.5	28.7	33.4	25.8	20.3	32.1	27.6	34.6	29.2	23.2	147	186	174	171	187
Orn	35.8	19.7	44.1	58	40.6	41.9	26.7	29	34.6	41.1	26.6	31.8	40.6	27.6	53	40.9	78.7	37.4	52.6	36.6	38.1	30.6	29.6	67.8	66.7	32.7	45.7	69.3	67.5	24.6	24.8	36.9	34.3	73.2	124	33.4	53.5	43.2	41.7	57.3	30.7	33.6	56.2	39.7	157	184	190	166	184
Phe	45.9	44.9	54.6	47.2	42.4	41	41.8	47.2	53.2	48.8	51.1	48.9	58.4	44.8	41.3	43.2	52.8	73.6	62.3	50.6	59.4	54.1	54.3	44.1	55	53.7	70.1	69.8	70.6	51.5	40.9	61.2	53.7	67.3	78.2	52.6	63.9	49.4	48.9	64.3	36.2	51.8	43.3	52.6	154	181	181	170	168
Pro	35.2	41.5	57.8	57.4	41.7	44.1	36	63.1	35.3	33.4	41.4	38.5	53.5	42	42.2	41.1	64	55.8	44.2	36.4	56.2	54.7	46.8	44	42.6	40.2	60	62.1	53.2	43.2	37.2	50.2	34.4	43.4	73.6	44.6	74.1	62.5	41	76.2	43.2	48.5	45.6	35.6	350	409	417	375	357
Ser	163	193	176	204	166	184	101	155	108	78.9	213	162	188	139	122	129	225	197	143	109	195	176	163	162	128	144	165	211	228	159	129	160	132	126	200	136	198	201	134	178	178	188	136	118	176	204	205	197	192
Thr	69.5	45.9	52.2	57.1	29	44.8	49.1	30.9	45.8	41.8	41.2	65.5	115	47.8	106	147	98.8	104	86.1	44.9	55.8		63.9	42.4	73.2	61.1	74.4	104	119	32.8	48.8	95.1	54.3	66	86.7	51.3	86.1	58.4	58.6	101	61.4	125	39.8	62.1	201	207	206	189	210
Trp	74.4	64.1	65.6	57.3	66.5	61	58	33.6	67.2	55.2	37.4	59.2	62.6	57.7	68.3	69.5	52.8	93	99.3	55.5	73	65.1	91	64.9	67.1	72.1	70.9	73.5	70.9	57	62.8	71.7	81.7	82.4	84.2	55.8	70.2	66.2	50	61.9	65.6	54.7	51.3	79.2	151	188	177	177	181
Tyr	70.1	64.2	69.3	81.2	37.7	41.6	43.1	52.9	58.4	54.1	48.1	62.8	80.1	49.3	56.8	59.7	73.9	110	90.7	53.1	58.8	61.3	50.6	58	64	59.1	74.5	89.1	98.7	50.5	52.8	71.6	40	64.3	93.2	45	66.4	46.6	51.4	76.4	59.3	71.4	51.8	62	163	192	192	179	178
Val	58.4	70	125	92	86.5	75.8	97.1	102	97.3	80.4	106	84.7	127	104	78.4	104	92.5	170	115	118	128	106	129	88	130	107	137	118	130	95.4	73	126	125	120	160	95.6	156	143	149	187	87.8	147	80	111	322	368	367	343	338
Ac-Orn	0	0	0	0	0	0	0	0	0	0	0	0	0	0	0	0	0	0	0	0	0	0	0	0	0	0	0	0	0	0	0	0	0	0	0	0	0	0	0	0	0	0	0	0	16	17.7	18.4	16.3	17.5
ADMA	2.43	2.14	2.77	2.67	2.79	2.18	1.98	2.13	2.21	2.39	1.79	1.84	2.28	2.24	2.35	2.32	2.77	2.09	2.81	2.49	2.13	2.18	1.96	2.11	2.2	2.22	2.34	2.75	2.65	2.38	2.52	2.67	2.21	2.97	2.96	2.63	2.6	2.27	1.8	2.17	2.4	2.41	2.57	2.38	7.18	7.76	7.83	7.24	7.78
alpha-AAA	0.736	0.567	0.902	0.839	1.4	0.529	0.803	1.04	1.41	0.908	0.274	0.956	1.25	1.23	1.08	1.52	0.709	1.26	1.95	0.752	0.773	0.67	0.859	0.707	0.953	0.79	1.57	2.15	2.86	1	1.26	1.57	1.34	1.55	2.7	0.942	0.919	1.03	1.01	1.42	0.896	1.89	0.964	1.43	29.9	32.7	35.5	31.6	32.2
c4-OH-Pro	0	0	0	0	0	0	0	0	0	0	0	0	0	0	0	0	0	0	0	0	0	0	0	0	0	0	0.111	1.46	0	0	0	0	0	0	0.848	0	0	0	0	0	0	0	0	0	27	30.7	30.6	28.2	26.8
Carnosine	11	10	13	9.94	11.6	11.1	16.6	13.4	13.6	10.5	13.1	13.5	12.7	14	13.8	11	10.9	10.1	13.7	12.5	10.8	10.5	14.9	11.1	11.4	13.5	12.8	14.5	13.4	12.6	12.2	9.86	19	17.9	14.2	13.9	18.4	14.4	9.53	8.87	10.2	7.45	11.3	9.34	13.4	15.6	15.5	14.8	14.5
Creatinine	108	89.2	113	78.7	103	100	135	101	122	99.6	78.1	83.9	85.8	112	103	104	94.3	89.9	92.3	126	87.9	73.4	100	81.5	85.7	101	103	95.7	79.5	123	112	114	125	114	109	136	135	99.9	87.3	87.9	87.2	81.4	92.3	99.4	320	324	345	300	332
DOPA	0	0	0	0	0	0	0	0	0	0	0	0	0	0	0	0	0	0.015	0	0	0	0	0	0	0	0	0.171	0.56	0	0	0	0.008	0	0	0.481	0	0	0	0	0	0	0.05	0	0	13.9	15.2	14.9	12.5	13.9
Dopamine	0	0	0	0	0	0	0	0	0	0	0	0	0	0	0	0	0	0	0	0	0	0	0	0	0	0	0.439	2.66	0	0	0	0	0	0	1.27	0	0	0	0	0	0	0	0	0	31.9	35.9	32	28.8	34.2
Histamine	0	0	0	0	0	0	0	0	0	0	0	0	0	0	0	0	0	0	0	0	0	0	0	0	0	0	0.226	0.868	0	0	0	0	0	0	1.38	0	0	0	0	0	0	0	0	0	28.7	34.8	33.3	31.1	35.5
Kynurenine	3.38	3.42	2.98	3.1	3.56	3.34	3.25	2.42	3.27	2.3	2.38	2.64	2.37	2.6	2.7	3.23	2.19	3.23	4.29	2.9	2.92	2.09	3.36	2.55	2.13	2.64	3.12	4.23	3.52	4.45	3.18	4.52	4.03	2.86	3.99	3.03	2.63	3.18	2.47	2.31	1.96	1.95	2.67	4.25	26.9	31.4	30.6	29.1	28.6
Met-SO	0.088	0.243	0.098	0.296	0.036	0.015	0.189	0.469	0.229	0.07	0	0.038	0.125	0	0	0	0.255	3.83	0	0.285	0.001	0.177	0	0.062	0.032	0	0.262	0.648	0.144	0.009	0.091	0.424	0	0	0.807	0.162	0.808	0.405	0.322	1.74	0.113	0.702	0.157	0	18	22.3	22.3	20.7	22.9
Nitro-Tyr	0	0	0	0	0	0	0	0	0	0	0	0	0	0	0	0	0	0	0	0	0	0.325	0	0	0	0	0	0.564	0	0	0	0	0	0	1.34	0	0	0	0	0	0	0	0	0	31.5	36.8	35.6	34.1	33.6
PEA	0	0	0	0	0	0	0	0	0	0	0	0	0	0	0	0	0	0	0	0	0	0	0	0	0	0	0	0.061	0	0	0	0	0	0	0	0	0	0	0	0	0	0	0	0	3.16	3.58	3.45	3.34	4.08
Putrescine	0.054	0.207	0.18	0.229	0.164	0.084	0.168	0.73	0.084	0.158	0.075	0.155	0.138	0.162	0.173	0.111	0.223	0.147	0.297	0.186	0.125	0.095	0.106	0.131	0.118	0.189	0.235	0.36	0.274	0.16	0.158	0.216	0.193	0.286	0.37	0.172	0.165	0.105	0.08	0.107	0.177	0.181	0.136	0.214	2.87	3.1	3.08	2.63	3.1
Sarcosine	2.44	0	3.03	2.8	1.81	0	2.77	2.16	3.78	0	2.1	0	2.71	2.29	0	2.72	3.23	3.8	2.7	2.86	3.65	4.35	0	2.5	2.21	1.94	2.76	4.6	1.52	1.6	1.6	3.38	2.74	1.9	3.69	1.72	3.3	2.45	1.6	2.81	0	2.77	2.06	4.16	20.8	19.5	25	18	21.2
SDMA	0.403	0.293	0.374	0.327	0.414	0.348	0.333	0.352	0.379	0.381	0.276	0.318	0.345	0.328	0.318	0.339	0.381	0.289	0.415	0.394	0.323	1.26	0.322	0.315	0.31	0.291	0.406	0.429	0.393	0.35	0.408	0.433	0.367	0.484	0.517	0.408	0.403	0.336	1.15	0.267	0.327	0.336	0.356	0.403	2.81	2.85	3.09	2.48	2.78
Serotonin	0.501	0.403	1.02	0.393	1.61	0.048	1.04	0.176	0.365	0.387	0.288	0.156	0.106	0.057	0.449	0.045	0.453	0.359	0.254	0.263	0.596	0.354	0.09	0.266	0.385	0.357	0.318	0.444	0.235	0.072	0.225	0.158	0.15	0.532	0.182	0.336	0.098	0.315	0.139	0.059	1	0.157	1.15	0.596	2.91	3.28	2.94	2.96	3.8
Spermidine	0.034	0.034	0.082	0.057	0.045	0.077	0.069	0.045	0.062	0.033	0.033	0.051	0.038	0.074	0.061	0.024	0.066	0.034	0.06	0.075	0.04	0.04	0.041	0.093	0.052	0.039	0.202	0.393	0.051	0.034	0.05	0.182	0.037	0.071	0.362	0.036	0.124	0.058	0.067	0.042	0.061	0.086	0.039	0.043	7.51	9.36	8.53	7.16	9.79
Spermine	0	0	0	0	0	0.161	0.137	0	0	0	0	0	0	0.099	0	0	0.103	0	0.092	0.086	0	0	0	0.146	0	0	0.233	0.408	0	0	0	0.389	0	0	0.416	0	0.226	0.136	0.159	0	0	0.138	0	0	8.24	9.3	9.26	7.72	8.16
t4-OH-Pro	7.05	10.4	8.84	6.92	7.93	6.45	6.33	6.48	7.7	7.36	6.83	6.32	7.24	8.62	7.03	7.95	7.73	4.71	5.35	6.96	7.1	6.15	7.68	6.89	5.33	6.89	8.63	8.88	7.31	8.16	6.94	11.2	7.68	8.66	10.1	9.08	9.5	7.37	7.65	8.25	7.28	8.06	6.28	7.13	33.4	37.9	38	35.6	34.6
Taurine	45.4	31.3	48.3	75.3	34.1	29.5	43.8	37.7	39.4	38.8	47.6	46.6	44.4	34.3	48.1	45.9	70.6	33.1	40.1	30.7	43.7	35.1	39	45	47.1	51	58.3	43.8	52.6	37.8	35	41.7	43.5	45.2	68.5	36.5	47.7	41.1	27.7	31.8	37.2	31.4	44.6	39.9	87.6	90.8	91.6	83.2	88
lysoPC a C14:0	4.52	5.11	4.43	4.58	4.69	4.43	4.31	4.43	4.99	4.45	4.8	4.61	4.43	5.01	4.56	4.96	4.84	5.12	4.51	4.94	4.65	4.52	5.12	4.56	5.54	4.19	4.59	4.73	4.37	4.8	4.61	4.67	4.44	4.56	4.31	4.62	4.83	4.7	3.92	3.91	4.6	4.54	4.69	4.64	5.43	5.77	6.96	5.23	5.19
lysoPC a C16:0	7.17	11.9	8.82	16.4	12	11.3	9.19	5.95	7.82	7.63	6.61	8.05	8.29	7.13	6.16	10.6	12	13.4	15.2	11.7	10.5	12.9	13.5	17.4	14.9	10.5	10.8	17.5	16.7	7.55	6.6	12.7	8.07	7.77	22.4	9.21	9.11	10.8	12.4	10.3	8.96	13.8	7.01	8.85	124	148	175	142	118
lysoPC a C16:1	0.195	0.369	0.361	0.386	0.587	0.503	0.508	0.214	0.379	0.471	0.222	0.303	0.368	0.276	0.265	0.425	0.319	0.395	0.773	0.513	0.389	0.397	0.519	0.593	0.459	0.408	0.324	0.554	0.578	0.262	0.244	0.467	0.546	0.53	0.789	0.412	0.523	0.522	0.464	0.421	0.307	0.483	0.246	0.496	1.99	2.35	2.75	2.41	1.96
lysoPC a C17:0	0.452	0.637	0.515	0.833	0.54	0.568	0.546	0.413	0.498	0.462	0.311	0.467	0.383	0.411	0.389	0.382	0.66	0.696	0.62	0.634	0.71	0.672	0.603	1.03	1.3	0.553	0.57	0.999	0.911	0.452	0.495	0.77	0.485	0.45	1.11	0.434	0.57	0.555	0.665	0.542	0.483	0.575	0.498	0.604	1.94	2.36	3.06	2.31	2.09
lysoPC a C18:0	10.8	15.6	9.85	17.2	9.3	10.9	9.95	7.14	9.93	11.2	7.3	10	7.27	8.62	9.21	10	13.7	10.7	13	9.38	11.4	15.1	16.2	18.2	12.7	10.6	10.9	20.1	19.9	8.51	8.69	13.4	11.8	11.1	24.9	8.65	12.8	12.5	10.3	8.92	10.4	11	10	12.9	79.3	107	126	99.5	84.3
lysoPC a C18:1	2.98	3.91	2.8	4.57	2.9	2.77	3.31	1.83	2.39	2	2.33	2.14	2.5	2.26	1.77	3.04	3.33	3.88	4.53	2.81	3.07	3.36	3.26	4.19	4.8	3.21	3.21	5.81	5.44	1.85	1.65	3.09	3.06	2.76	6.35	1.61	3.4	2.93	3.24	2.95	2.56	3.75	1.76	2.5	18.8	23.8	29	22.9	19.6
lysoPC a C18:2	4.12	5.84	5.32	5.39	4.33	4.11	5.87	3.62	4.61	4.67	3.23	3.4	2.84	4.36	3.75	4	4.26	5.41	6.08	3.97	4.68	4.56	6.08	4.51	5.46	4.32	4.21	5.87	5.49	3.54	3.15	4.16	6.41	5.13	7.28	3.31	5.53	5.26	5.39	4.83	3.61	4.11	3.58	3.87	26.9	32.5	39.2	31.4	26.5
lysoPC a C20:3	0.172	0.179	0.15	0.18	0.223	0.218	0.152	0.147	0.171	0.197	0.147	0.188	0.16	0.156	0.164	0.169	0.186	0.176	0.248	0.15	0.232	0.17	0.237	0.203	0.172	0.153	0.166	0.212	0.183	0.134	0.17	0.169	0.21	0.183	0.309	0.122	0.204	0.17	0.135	0.15	0.225	0.182	0.149	0.143	1.79	2.31	2.84	2.11	1.87
lysoPC a C20:4	0.102	0.184	0.177	0.168	0.149	0.143	0.207	0.089	0.149	0.142	0.097	0.105	0.101	0.145	0.091	0.117	0.096	0.162	0.18	0.163	0.132	0.125	0.166	0.125	0.151	0.115	0.151	0.153	0.148	0.133	0.09	0.193	0.188	0.135	0.47	0.118	0.157	0.152	0.17	0.166	0	0.181	0.145	0.144	7.05	8.71	10.3	8.07	7.37
lysoPC a C24:0	0.049	0	0.068	0.054	0.054	0.093	0.068	0.04	0.062	0.055	0.058	0.066	0.044	0.064	0.07	0.045	0.056	0.071	0.06	0.045	0.116	0.04	0.079	0.053	0.101	0.042	0.045	0.082	0.058	0.04	0.046	0.045	0.063	0.078	0.044	0.054	0.066	0.06	0.073	0.036	0.041	0.033	0.085	0.036	0.197	0.24	0.315	0.18	0.304
lysoPC a C26:0	0.101	0.197	0.098	0.057	0.108	0.314	0.091	0.114	0.168	0.22	0.053	0.086	0.066	0.125	0.134	0.097	0.087	0.126	0.197	0.104	0.346	0.117	0.154	0.144	0.189	0.071	0.141	0.16	0.096	0.103	0.102	0.097	0.104	0.078	0.108	0.085	0.126	0.11	0	0.087	0.084	0.073	0.224	0.15	0.194	0.164	0.34	0.216	0.543
lysoPC a C26:1	0	0.085	0.073	0.031	0.033	0.099	0	0.052	0.072	0.08	0.04	0.038	0.048	0.064	0.062	0.045	0.039	0	0.078	0.055	0.128	0.051	0.086	0	0.054	0.034	0.048	0.056	0.053	0.053	0.06	0.045	0.058	0.056	0.062	0.033	0.057	0.052	0.081	0.067	0.051	0.06	0.076	0.043	0.164	0.08	0.204	0.096	0.39
lysoPC a C28:0	0.332	0.287	0.223	0.226	0.289	0.411	0.275	0.255	0.329	0.356	0.256	0.236	0.198	0.345	0.244	0.183	0.244	0.352	0.412	0.217	0.583	0.35	0.315	0.319	0.424	0.266	0.307	0.289	0.318	0.316	0.235	0.271	0.268	0.275	0.252	0.202	0.274	0.229	0.241	0.24	0.217	0.252	0.457	0.208	0.189	0.163	0.276	0.193	0.44
lysoPC a C28:1	0.199	0.252	0.189	0.152	0.181	0.288	0.199	0.164	0.194	0.223	0.201	0.176	0.159	0.222	0.2	0.171	0.201	0.236	0.246	0.158	0.414	0.207	0.232	0.168	0.238	0.169	0.197	0.2	0.209	0.218	0.167	0.191	0.202	0.205	0.203	0.132	0.168	0.181	0.228	0.173	0.187	0.172	0.235	0.161	0.223	0.188	0.38	0.225	0.457
PC aa C24:0	0.021	0.033	0.028	0.019	0.026	0.062	0.025	0.034	0.028	0.031	0.026	0.03	0.026	0.035	0.034	0.027	0.022	0.024	0.041	0.031	0.092	0.03	0.041	0.03	0.048	0.023	0.023	0.032	0.023	0.029	0.022	0.067	0.032	0.029	1.22	0.021	0.071	0.028	0.043	0.029	0.018	0.139	0.06	0.027	29	30.7	31.4	31.6	30
PC aa C26:0	0.436	0.691	0.469	0.393	0.483	0.945	0.492	0.519	0.559	0.669	0.49	0.448	0.479	0.568	0.529	0.474	0.488	0.563	0.969	0.424	1.22	0.533	0.554	0.526	0.519	0.437	0.481	0.519	0.533	0.494	0.47	0.431	0.521	0.513	0.419	0.385	0.555	0.469	0.527	0.467	0.427	0.452	0.817	0.434	0.566	0.416	0.656	0.49	1.41
PC aa C28:1	0.799	0.873	0.535	0.553	0.806	0.778	0.721	0.642	0.634	0.74	0.712	0.663	0.637	0.746	0.724	0.68	0.604	0.76	0.998	0.62	1.03	0.645	0.722	0.629	0.736	0.666	0.691	0.706	0.661	0.634	0.479	0.613	0.692	0.777	0.831	0.543	0.756	0.618	0.681	0.513	0.555	0.496	0.698	0.497	1.14	1.38	1.36	1.3	1.66
PC aa C30:0	1.56	2.04	1.56	1.57	1.76	1.56	1.86	1.34	1.49	1.41	1.68	1.42	1.66	1.5	1.31	1.39	1.6	1.8	2.33	1.72	2.16	1.71	1.3	1.48	1.77	1.79	1.72	1.77	1.77	1.64	1.27	1.85	1.42	1.87	1.79	1.24	1.27	1.13	1.84	1.46	1.39	1.42	1.52	1.39	1.64	1.89	1.77	1.7	1.93
PC aa C30:2	0.083	0.112	0.105	0.06	0.083	0.123	0.109	0.074	0.087	0.117	0.066	0.099	0.081	0.092	0.109	0.064	0.078	0.054	0.135	0.063	0.176	0.092	0.102	0.077	0.105	0.083	0.079	0.073	0.095	0.067	0.084	0.067	0.123	0.104	0.108	0.065	0.086	0.073	0.091	0.098	0.058	0.064	0.124	0.08	0.275	0.341	0.281	0.223	0.156
PC aa C32:0	5.36	7.66	6.22	6.28	5.33	5.83	7.67	5.52	5.21	4.98	6.27	4.77	5.53	5.2	4.55	4.9	5.41	5.8	8.25	5.89	5.97	5.95	5.27	4.25	4.53	5.77	5.34	5.95	6.38	5.31	3.94	6.49	4.73	5.08	5.58	4.51	6.43	4.48	6.49	6.1	4.75	5.62	4.33	5.48	6.47	8.79	8	7.55	7.89
PC aa C32:1	5.44	7.05	8.33	7.51	11.4	10.8	13.6	7.47	5.92	7.58	7.41	6.72	12.4	7.2	6.37	9.24	6.15	9.73	19.6	9.02	8.44	7.37	8.74	6.42	8.97	8.33	8.37	10.1	8.75	7.77	5.59	9.12	9.12	10.1	9.86	7.9	10.6	7.33	10.5	9.57	6.81	10.2	4.94	9.11	4.43	6.4	5.16	5.32	5.25
PC aa C32:2	3.68	3.4	3.64	3.5	4.09	3.2	4.44	2.59	2.89	3.57	3.09	3.09	3.82	3.14	2.92	3.25	2.95	3.94	5.43	3.66	3.09	2.7	2.43	2.47	3	3.54	3.33	3.31	3.39	3.25	2.36	3.38	3.45	5.44	3.63	2.76	2.92	2.53	4.05	3.43	2.61	2.96	2.1	3.12	1.57	2.18	1.81	1.75	1.8
PC aa C32:3	1.11	1.16	1.45	1.28	1	0.887	1.51	0.916	1.22	1.34	0.828	0.992	0.925	1.06	1.13	1.1	0.918	1.12	1.37	0.69	0.876	0.847	0.997	0.756	0.528	0.707	0.669	0.713	0.823	1.21	0.978	1.26	1.26	1.54	1.34	0.907	0.76	0.535	1.49	1.51	1.17	0.999	0.612	0.67	0.294	0.407	0.337	0.32	0.371
PC aa C34:1	60.9	64.6	80.4	98.4	94.5	83	106	61.3	47	45.4	82.1	65.3	115	58.6	54.6	102	76	119	165	79.9	64.4	66.5	65.4	74.5	102	86.2	84.4	105	102	55.1	41	72.4	60.1	78.8	97.8	51.7	69.3	58.8	84	78.9	71.6	91.8	39.8	56.9	83.6	103	98.5	99.6	88.6
PC aa C34:2	213	244	231	247	251	236	254	196	162	188	215	228	232	199	214	260	213	255	286	213	191	195	215	183	210	238	222	257	265	204	173	228	193	215	243	192	211	185	234	229	215	223	193	225	184	246	218	222	201
PC aa C34:3	10.6	13	14.4	16.3	28.8	21	23.8	12.6	10	15.3	8.24	18.5	19.3	12.5	16.7	19.2	13.3	22.6	28.6	15	12.1	11.9	18.4	17	14.7	14.7	14.1	19.4	20.4	12.4	13.4	16.3	19.5	23.5	22.8	15.7	22.8	17.3	19.7	18.5	16.9	18.4	17.3	17.5	6.14	7.34	6.71	6.96	6.37
PC aa C34:4	0.679	0.76	0.772	0.78	1.38	1.09	1.61	0.676	0.605	0.999	0.438	0.817	1.01	0.739	1.1	0.914	0.576	0.847	1.23	0.722	0.647	0.595	0.892	0.805	0.633	0.599	0.622	0.8	0.87	0.74	0.774	0.857	1.48	1.66	1.28	0.835	1.8	0.986	1.03	1.01	0.932	0.976	0.766	0.864	0.722	0.848	0.817	0.787	0.739
PC aa C36:0	0	0	0	0	0	0	0	0	0	0	0	0	0	0	0	0	0	0	0	0	0	0	0	0	0.37	0	0	0	0	0	0	0	0	0	0	0	0	0	0	0	0	0	0	0	0.876	1.04	0.794	0.999	0.679
PC aa C36:1	79.2	71.8	92.6	105	62.7	68.7	108	64.7	56.4	59	101	74	96.7	73.3	72.2	93.7	80	108	137	57.2	72.1	77.7	67.3	65.2	98.6	88.9	87.9	117	108	54.1	57.5	65.2	82.3	92.1	114	43.4	69.9	61.9	67.1	65.1	85.6	70.2	56.4	66.4	19	24.1	23.1	21.8	21
PC aa C36:2	290	351	266	252	261	241	251	255	230	235	257	269	246	267	273	273	239	288	285	241	227	231	273	211	219	259	236	272	288	239	237	237	244	256	280	243	250	223	276	263	285	235	258	263	117	149	136	139	125
PC aa C36:3	132	112	94.6	107	94.7	93.1	126	80.3	71.6	76.4	93.9	87.9	108	87.1	88.4	98.9	87.9	97.2	119	75.5	89.7	79.8	85.3	77.5	98.5	106	99.9	116	120	74.2	65.5	80.3	95.6	101	105	66.8	108	83.9	98.6	92	89.2	86.9	81.2	94.4	60.9	74.1	69.3	67.7	65.6
PC aa C36:4	52	57	45	51.3	41.7	37.4	63.1	35.3	32	31	35.5	35.3	41.6	36.4	41.5	40.5	38.8	46.2	30.9	35	36.2	38.5	35.2	34.2	38.6	45	44.1	44.8	45.9	27.8	28.8	31.5	45.7	49.3	49.9	27.2	50.4	37.3	48.5	44.5	44.1	41.7	29.5	37.8	99.5	120	111	109	104
PC aa C36:5	11.8	11.4	8.7	13.1	14.9	11.1	16.2	8.71	6.06	7.68	4.06	13	9.72	8.06	12	11.1	10.2	13.6	8.25	7.97	7.46	9.05	8.49	9.21	6.89	8.64	9.16	13.9	13.4	6.34	10.4	8.4	11.7	12.9	13.2	7.48	12.5	9.76	14.2	13	13.9	13.2	11.8	11.7	5.83	7.08	7.17	6.64	6.11
PC aa C36:6	0.419	0.482	0.384	0.516	0.792	0.622	0.867	0.339	0.306	0.466	0.195	0.837	0.51	0.337	0.67	0.526	0.472	0.722	0.432	0.423	0.369	0.449	0.48	0.571	0.326	0.376	0.43	0.827	0.952	0.347	0.615	0.416	0.791	0.764	0.829	0.445	0.837	0.639	0.865	0.889	0.859	0.665	0.896	0.546	0.295	0.323	0.367	0.307	0.314
PC aa C38:0	0.292	0.492	0.346	0.391	0.307	0.374	0.421	0.292	0.313	0.377	0.329	0.399	0.326	0.373	0.357	0.323	0.346	0.248	0.495	0.272	0.332	0.308	0.325	0.285	0.894	0.359	0.331	0.419	0.422	0.384	0.342	0.531	0.369	0.34	0.413	0.234	0.37	0.268	0.307	0.337	0.298	0.335	0.345	0.31	0.936	1.23	1.23	1.21	1.1
PC aa C38:1	0.23	0.09	0.267	0.18	0.319	0.239	0.243	0.088	0	0.015	0.391	0	0.595	0	0.091	0.434	0.073	1.14	0.865	0.36	0.516	0.119	0.294	0.014	1.34	0.211	0.17	0.39	0.413	0	0	0.037	0.125	0.475	0.433	0.06	0	0.038	0.604	0.104	0.19	0.342	0	0	0.207	0.518	0.344	0.172	0
PC aa C38:3	17	14.7	13.1	13.4	15.4	12.2	22.6	14.2	10.8	11.3	13.8	16.4	21.1	12.8	15.8	20.5	11.8	13.4	19.9	13.2	16.6	12.4	12.3	16.2	19.1	20.9	21	22.7	23.1	11.6	14	16.3	17.7	19.4	23.2	10.5	17.1	13.6	15	15.1	19.3	17.4	15.1	15.3	21.7	28.3	25.4	25.2	23.1
PC aa C38:4	16.9	19.2	18.2	14.6	15.8	16.6	22.8	15.5	14.7	12.9	12.1	14.9	16.3	15.3	14.8	14	12.8	15.6	12.7	17	17	15	19.1	13.2	15.2	18.2	16.1	17.2	16.4	15.9	15.5	18.5	18.3	18.4	18.2	13.9	18.2	17.2	17.4	16.3	18.3	15.7	16.8	17.6	57.5	72	65.1	61.2	58.5
PC aa C38:5	6.66	8.25	8.64	8.49	10.9	10	13.8	9.28	6.54	6.54	4.65	9.59	8.77	7.72	8.63	8.09	6.57	7.6	7.33	8.8	8.44	7.2	10.5	7.75	8.3	9.03	8.9	9.39	9.56	7.81	8.33	9.64	9.85	10.7	11.2	7.39	12	8.66	10.3	9.47	11	9.61	11.1	11.2	22.5	26.4	26.4	25.1	22.7
PC aa C38:6	2.28	3.24	2.98	2.65	3.39	3.6	5.01	2.6	2.24	2.11	1.38	2.44	2.66	2.37	2.34	2.53	2.1	2.73	1.85	3.27	2.81	2.33	3.27	2.39	2.55	2.86	2.72	2.4	2.28	2.77	2.48	3.45	3.25	3.07	3.63	2.22	3.66	2.59	3.86	3.33	2.96	3.21	2.58	3.39	22.4	29.2	28.8	27.6	23.7
PC aa C40:1	0.228	0.213	0.203	0.248	0.224	0.206	0.21	0.198	0.201	0.215	0.281	0.234	0.198	0.218	0.197	0.208	0.227	0.231	0.257	0.176	0.205	0.221	0.208	0.216	0.238	0.238	0.21	0.247	0.242	0.196	0.192	0.245	0.211	0.242	0.269	0.189	0.196	0.17	0.222	0.176	0.251	0.202	0.251	0.161	0.247	0.327	0.302	0.29	0.28
PC aa C40:2	0.238	0.177	0.171	0.236	0.205	0.179	0.246	0.129	0.144	0.121	0.238	0.24	0.231	0.143	0.183	0.253	0.161	0.226	0.2	0.115	0.179	0.16	0.173	0.157	0.257	0.275	0.211	0.28	0.278	0.127	0.177	0.168	0.19	0.23	0.303	0.129	0.193	0.183	0.177	0.195	0.196	0.212	0.181	0.191	0.173	0.233	0.205	0.202	0.19
PC aa C40:3	0.302	0.326	0.233	0.337	0.304	0.211	0.348	0.245	0.211	0.187	0.305	0.339	0.372	0.221	0.306	0.339	0.253	0.269	0.273	0.226	0.316	0.238	0.231	0.28	0.385	0.404	0.36	0.382	0.432	0.185	0.269	0.297	0.308	0.389	0.426	0.197	0.373	0.23	0.276	0.307	0.334	0.299	0.288	0.258	0.333	0.347	0.388	0.336	0.305
PC aa C40:4	0.673	0.849	0.704	0.658	0.613	0.559	0.831	0.655	0.621	0.513	0.613	0.687	0.846	0.663	0.615	0.722	0.528	0.69	0.62	0.72	0.764	0.581	0.693	0.614	0.831	0.977	0.896	0.91	0.854	0.721	0.736	1.03	0.782	0.768	0.975	0.498	0.771	0.63	0.835	0.767	0.891	0.845	0.713	0.71	2.11	2.37	2.32	2.27	2.06
PC aa C40:5	1.97	3.12	2.46	2.11	2.07	2.78	3.4	2.17	2.59	2.17	1.25	2.14	2.33	2.27	2.21	2.25	1.8	1.86	2.14	2.83	2.56	2.17	3.43	1.89	2.35	2.33	2.46	2.43	2.4	3.08	2.91	4.3	2.16	1.98	2.48	2.19	2.97	2.47	2.74	2.66	3.2	2.77	2.95	3.83	4.22	5.31	4.74	4.38	4.51
PC aa C40:6	1.75	2.74	2.57	1.62	1.83	2.91	3.73	2.29	2.3	1.94	1.27	1.88	2.13	2.16	2.02	2.13	1.56	1.47	1.44	2.64	2.78	2.06	3.09	1.71	1.98	2.17	2.07	1.77	1.82	2.73	2.33	3.25	2.45	1.83	2.38	1.95	2.68	2.15	2.8	2.59	2.28	2.21	2.86	2.99	8.3	10	9.31	9.14	8.65
PC aa C42:0	0.066	0.112	0.086	0.078	0.102	0.103	0.107	0.071	0.074	0.067	0.084	0.072	0.099	0.085	0.092	0.084	0.089	0.07	0.105	0.068	0.081	0.064	0.085	0.082	0.096	0.081	0.075	0.105	0.092	0.064	0.075	0.087	0.073	0.07	0.096	0.075	0.087	0.088	0.114	0.088	0.087	0.089	0.067	0.083	0.256	0.304	0.33	0.295	0.292
PC aa C42:1	0.082	0.089	0.044	0.092	0.089	0.066	0.071	0.051	0.036	0.053	0.053	0.066	0.044	0.055	0.086	0.063	0.077	0.079	0.107	0.046	0.081	0.066	0.045	0.082	0.058	0.069	0.042	0.07	0.095	0.066	0.068	0.046	0.049	0.087	0.081	0.056	0.057	0.062	0.058	0.047	0.061	0.041	0.078	0.055	0.197	0.231	0.232	0.213	0.219
PC aa C42:2	0.21	0.28	0.194	0.179	0.205	0.189	0.242	0.177	0.149	0.17	0.181	0.197	0.195	0.148	0.203	0.197	0.182	0.19	0.205	0.154	0.167	0.148	0.192	0.159	0.169	0.21	0.201	0.255	0.207	0.159	0.175	0.173	0.171	0.216	0.226	0.132	0.184	0.163	0.179	0.204	0.217	0.207	0.183	0.148	0.208	0.186	0.194	0.173	0.203
PC aa C42:4	0.065	0.072	0.035	0.054	0.043	0.047	0.058	0.042	0.041	0.051	0.04	0.051	0.038	0.049	0.045	0.036	0.039	0.045	0.044	0.041	0.062	0.044	0.074	0.063	0.058	0.046	0.043	0.071	0.059	0.045	0.037	0.059	0.047	0.059	0.061	0.032	0.083	0.044	0.044	0.046	0.05	0.049	0.057	0.032	0.147	0.169	0.18	0.18	0.173
PC aa C42:5	0.078	0.101	0.075	0.095	0.096	0.069	0.111	0.075	0.095	0.077	0.059	0.105	0.098	0.088	0.108	0.124	0.077	0.1	0.106	0.118	0.087	0.074	0.105	0.083	0.095	0.104	0.099	0.107	0.101	0.115	0.121	0.167	0.078	0.083	0.116	0.093	0.136	0.102	0.136	0.091	0.119	0.13	0.075	0.118	0.207	0.22	0.209	0.236	0.157
PC aa C42:6	0.152	0.204	0.195	0.151	0.153	0.17	0.216	0.164	0.165	0.165	0.116	0.178	0.182	0.172	0.171	0.188	0.123	0.139	0.168	0.186	0.235	0.129	0.19	0.179	0.164	0.197	0.196	0.173	0.174	0.185	0.17	0.242	0.156	0.165	0.174	0.148	0.156	0.15	0.187	0.218	0.187	0.209	0.222	0.193	0.221	0.25	0.263	0.24	0.302
PC ae C30:0	0.614	0.688	0.523	0.614	0.578	0.556	0.616	0.544	0.496	0.517	0.638	0.556	0.518	0.564	0.453	0.417	0.595	0.77	0.874	0.54	0.744	0.575	0.401	0.454	0.623	0.702	0.734	0.669	0.698	0.713	0.446	0.697	0.513	0.588	0.612	0.404	0.459	0.42	0.545	0.543	0.522	0.508	0.525	0.452	0.137	0.126	0.136	0.124	0.208
PC ae C30:1	0.399	0.541	0.377	0.374	0.313	0.474	0.388	0.314	0.297	0.315	0.338	0.281	0.365	0.28	0.405	0.341	0.351	0.379	0.568	0.307	0.591	0.327	0.369	0.281	0.254	0.407	0.282	0.44	0.409	0.378	0.273	0.402	0.372	0.41	0.416	0.199	0.341	0.199	0.385	0.397	0.297	0.194	0.433	0.199	0.108	0.11	0.168	0.097	0.398
PC ae C30:2	0.047	0.052	0.045	0.036	0.047	0.046	0.034	0.028	0.038	0.046	0.037	0.036	0.032	0.046	0.043	0.04	0.035	0.05	0.056	0.03	0.059	0.038	0.042	0.036	0.04	0.035	0.033	0.047	0.047	0.039	0.031	0.038	0.044	0.043	0.048	0.032	0.033	0.033	0.048	0.048	0.035	0.037	0.048	0.032	0.051	0.053	0.06	0.052	0.103
PC ae C32:1	4.24	4.44	3.91	3.48	3.25	4.87	4.57	3.34	3.34	3.67	3.65	3.15	3.27	4.03	3.51	2.95	3.11	4.51	5.61	3.97	4.7	3.65	4.25	3.05	3.55	4.39	3.91	4.13	3.69	5.06	3.08	4.57	4.29	4.03	4.21	3.18	3.93	3.37	4.51	4.18	3.2	2.85	2.95	3.12	1.34	2.1	1.77	1.62	1.6
PC ae C32:2	3.14	3.06	2.84	2.93	2.17	2	2.54	2.25	1.91	2.42	2.4	1.9	1.84	2.55	2.04	1.77	2.47	2.92	3.69	1.95	2.64	2.37	1.77	1.67	1.96	2.67	2.45	2.61	2.86	3.37	2.14	2.84	2.73	2.61	2.52	1.55	1.99	2.02	2.66	2.51	1.92	1.72	1.85	1.75	0.356	0.419	0.417	0.43	0.452
PC ae C34:0	0.947	1.1	0.904	1.07	0.798	0.675	1.15	0.974	0.653	0.522	0.78	0.844	0.773	0.867	0.826	0.639	0.79	1.04	1.12	1.1	0.876	0.825	0.802	0.511	1.08	0.87	0.751	0.828	1.11	0.926	0.639	1.08	0.853	0.781	0.722	0.734	0.964	0.674	1.04	1.01	0.716	0.78	0.662	0.561	0.558	0.653	0.595	0.664	0.616
PC ae C34:1	12.1	12.7	11.6	10.6	10.9	13.9	14.5	10.1	9.83	10.2	12.1	9.38	12.4	9.91	9.45	10.9	10	14	18.7	13.2	12.8	11.3	11.9	10.4	12.7	12.9	12	12.4	12.3	12.6	8.77	13.4	10.8	10.8	12.8	10.1	11.9	10.3	13.2	11.5	10.3	9.82	7.57	8.09	3.56	4.96	4.55	4.33	3.99
PC ae C34:2	25.3	27.7	22.7	23.7	17.6	20	25.3	18	18.5	21.2	18.6	16.4	16.9	19.9	17.5	19.7	19	19.9	28	18.3	18.7	20.4	16.8	16.5	16.3	21.1	19.4	21.1	21	23.2	16.3	22.7	20.5	22.2	22.2	15.7	18.7	16.7	19.5	19.2	15.3	16.7	14.5	17.5	5.6	7.7	6.87	7.02	6.62
PC ae C34:3	18.5	22.7	25.8	26.4	16.2	14.4	23.4	15.1	14.1	16.2	14.3	12.5	12.7	16.8	17.5	18.9	14.9	11.4	20.5	8.43	12.3	13.7	14.6	11.8	7.41	9.29	8.59	9.9	9.81	21.1	17.3	24.1	23.5	25	25	15.6	11	9.34	22.2	22.4	19.2	17.7	8.14	9.44	5.09	6.86	6.71	5.8	5.64
PC ae C36:0	0.425	0.401	0.487	0.358	0.3	0.373	0.476	0.258	0.404	0.291	0.33	0.379	0.3	0.333	0.415	0.316	0.365	0.537	0.613	0.352	0.303	0.344	0.373	0.216	0.521	0.328	0.39	0.421	0.371	0.373	0.317	0.395	0.447	0.519	0.337	0.358	0.447	0.395	0.514	0.446	0.407	0.331	0.388	0.297	0.254	0.312	0.273	0.296	0.391
PC ae C36:1	5.41	5.38	6.61	7.27	7.02	5.88	7.97	6.22	3.96	3.38	6.38	6.26	7.71	5.05	4.48	6.12	5.61	9.74	9.79	6.78	6.06	5.16	4.65	6.15	8.18	7.46	7.59	8.46	8.58	4.84	5.06	5.74	5.67	6.52	9.29	3.98	5	4.68	6.56	6.81	7.19	6.33	3.91	3.75	4.48	6.07	5.49	5.38	4.86
PC ae C36:2	24.1	23.6	23.3	26.2	25.8	23.6	34.3	22.3	17.1	16.6	18.7	21.9	21.4	21.3	21.5	21	20.7	24.8	28.6	22	21.2	18.7	18.9	20.4	23.7	24.5	24.3	26	26.8	21.7	22.2	28	20.3	21.8	26	17.5	22.4	18.1	24.4	22.1	23.7	19.3	21	21.4	5.97	7.27	6.75	6.76	6.34
PC ae C36:3	10	11	9.27	9.39	8.53	8.57	11.4	7.51	6.35	7.75	8.24	6.98	8.43	7.85	8.04	8.75	6.72	7.92	10.4	6.99	7.47	6.9	7.37	7.01	7.42	8.72	8.4	9.18	8.89	8.65	7.64	10.4	9.22	9.63	10.1	6.07	8.27	7.09	9.25	8.48	8.03	7.03	5.92	6.62	3.54	4.95	4.22	4.58	3.79
PC ae C36:4	4.69	6.03	4.45	4.29	3.95	3.7	4.99	3.25	2.88	3.34	3.22	3.21	3.38	3.69	3.67	3.89	3.28	3.34	4.92	2.86	3.06	3.06	3.17	2.88	2.41	2.99	2.72	3.08	3.14	5.03	3.87	5.96	4.46	5.06	4.89	3.05	3.13	2.5	4.54	4.26	3.99	3.39	2.17	2.66	9.59	12.1	11.5	11.4	10.2
PC ae C36:5	1.69	2.52	2.03	1.84	1.91	1.43	2.1	1.42	1.3	1.56	1.07	1.29	1.23	1.45	1.36	1.42	1.15	1.31	2.04	1.06	1.21	1.2	1.5	1.08	0.832	1.08	1.02	1.11	1.07	2.1	1.67	2.79	2	2.34	2.08	1.35	1.26	1.02	2.11	1.99	1.79	1.42	0.971	1.11	6.77	8.57	8.27	7.66	6.91
PC ae C38:0	0.519	0.611	0.496	0.514	0.808	0.622	0.966	0.445	0.484	0.402	0.349	0.566	0.57	0.606	0.585	0.574	0.516	0.679	0.519	0.551	0.56	0.442	0.585	0.509	0.612	0.606	0.534	0.539	0.494	0.511	0.575	0.63	0.787	0.757	0.616	0.436	0.655	0.584	0.739	0.674	0.628	0.575	0.595	0.683	0.596	0.769	0.802	0.766	0.704
PC ae C38:1	1.17	1.28	1.17	1.38	0.894	0.986	1.3	1.2	0.71	0.793	1.48	1.29	1.53	1.01	0.987	1.31	1.13	2.3	1.9	0.821	1.4	0.966	0.96	1.37	2.1	1.7	1.75	2.57	1.92	0.754	0.93	0.861	1.08	1.78	1.88	0.597	0.976	0.64	1.15	0.925	1.61	1.04	1.1	0.67	1.39	1.51	1.49	1.44	1.47
PC ae C38:2	9.37	8.41	7.58	9.25	7.46	6.22	10.8	8.06	6.09	6.18	7.46	9.07	8.84	7.66	8.56	8.38	7.64	9.27	9.43	5.89	8.64	6.81	6.33	8.07	9.92	10.6	10.2	11.4	10.9	7.01	8.67	9.03	8.06	10	10.1	5.43	6.69	5.88	7.9	7.37	9.77	6.94	9.38	8.68	1.52	2.26	2.08	2.12	2.05
PC ae C38:3	2.86	2.73	2.76	2.83	3.04	2.33	4.38	2.77	2.29	2.29	2.05	3.05	3.38	2.56	2.88	3.01	2.15	2.92	4.51	2.6	2.74	2.13	2.4	2.67	3.32	3.56	3.64	3.86	3.75	2.83	2.88	3.05	2.88	3.3	3.75	2	3.02	2.44	2.88	2.82	3.68	2.68	2.97	2.97	4.19	5.15	4.93	4.44	4.48
PC ae C38:4	1.71	2.01	1.66	1.75	1.95	1.67	2.26	1.45	1.23	1.15	1.17	1.52	1.6	1.49	1.54	1.41	1.36	1.87	1.8	1.7	1.51	1.23	1.48	1.37	1.66	1.82	1.72	1.85	1.72	1.79	1.54	2.19	1.68	1.98	1.96	1.38	1.65	1.51	1.82	1.59	1.72	1.38	1.4	1.45	6.65	7.99	7.52	7.39	6.49
PC ae C38:5	1.88	2.32	1.61	1.57	1.56	1.71	2	1.26	1.17	1.45	1.36	1.47	1.51	1.39	1.3	1.39	1.17	1.48	2.13	1.37	1.39	1.19	1.53	1.14	1.29	1.52	1.36	1.75	1.65	2.02	1.56	2.53	1.73	1.84	2.08	1.21	1.65	1.3	1.78	1.6	1.41	1.3	1.21	1.5	8.87	11.5	10.4	10.4	8.96
PC ae C38:6	0.741	1.29	0.867	0.776	0.719	0.75	0.922	0.679	0.605	0.739	0.456	0.596	0.59	0.691	0.592	0.614	0.513	0.529	0.919	0.499	0.562	0.501	0.737	0.493	0.477	0.534	0.518	0.529	0.504	1.13	0.786	1.41	0.868	0.915	0.925	0.647	0.662	0.529	0.971	0.847	0.708	0.706	0.434	0.493	3.27	3.99	3.79	3.65	3.26
PC ae C40:1	0.386	0.65	0.375	0.318	0.36	0.49	0.879	0.375	0.262	0.268	0.163	0.301	0.326	0.389	0.402	0.321	0.29	0.313	0.237	0.449	0.462	0.354	0.443	0.299	0.408	0.381	0.297	0.27	0.236	0.337	0.379	0.457	0.528	0.312	0.369	0.312	0.53	0.323	0.539	0.467	0.471	0.451	0.324	0.518	0.562	0.653	0.596	0.631	0.646
PC ae C40:2	0.762	0.971	0.558	0.723	0.666	0.648	0.72	0.559	0.464	0.519	0.604	0.758	0.536	0.629	0.722	0.672	0.708	0.629	0.817	0.552	0.575	0.562	0.548	0.626	0.659	0.617	0.611	0.939	0.794	0.573	0.606	0.66	0.549	0.774	0.819	0.509	0.584	0.497	0.579	0.563	0.666	0.524	0.607	0.544	0.953	1.15	1.1	1.16	1.08
PC ae C40:3	0.457	0.455	0.384	0.505	0.419	0.346	0.529	0.401	0.254	0.288	0.413	0.423	0.365	0.383	0.397	0.38	0.426	0.532	0.503	0.34	0.375	0.358	0.377	0.412	0.448	0.509	0.467	0.57	0.544	0.356	0.4	0.396	0.375	0.468	0.595	0.302	0.359	0.299	0.419	0.406	0.44	0.328	0.377	0.328	2.1	2.48	2.64	2.39	2.18
PC ae C40:4	0.51	0.527	0.417	0.521	0.441	0.397	0.62	0.424	0.358	0.368	0.374	0.476	0.443	0.445	0.448	0.38	0.44	0.508	0.429	0.431	0.478	0.379	0.348	0.45	0.507	0.534	0.459	0.542	0.554	0.415	0.49	0.556	0.44	0.527	0.558	0.34	0.464	0.359	0.467	0.456	0.574	0.446	0.429	0.463	1.75	2.11	2.11	2.09	1.95
PC ae C40:5	0.313	0.472	0.373	0.372	0.394	0.36	0.51	0.36	0.294	0.277	0.295	0.421	0.401	0.308	0.353	0.304	0.34	0.366	0.411	0.403	0.376	0.285	0.393	0.345	0.393	0.421	0.422	0.446	0.393	0.446	0.389	0.529	0.362	0.419	0.468	0.305	0.356	0.327	0.467	0.404	0.473	0.375	0.437	0.379	2.71	3.18	3.19	2.93	2.94
PC ae C40:6	0.419	0.547	0.408	0.352	0.32	0.429	0.55	0.323	0.308	0.363	0.355	0.382	0.372	0.366	0.339	0.356	0.315	0.408	0.467	0.399	0.376	0.292	0.391	0.319	0.345	0.393	0.377	0.397	0.339	0.521	0.432	0.664	0.42	0.377	0.477	0.327	0.404	0.38	0.46	0.417	0.352	0.321	0.351	0.388	1.64	2.15	2.01	1.68	1.75
PC ae C42:0	0.301	0.319	0.296	0.298	0.27	0.293	0.307	0.337	0.254	0.308	0.277	0.299	0.295	0.281	0.314	0.289	0.276	0.28	0.301	0.29	0.336	0.285	0.325	0.262	0.299	0.341	0.254	0.314	0.305	0.283	0.286	0.311	0.243	0.293	0.335	0.268	0.304	0.284	0.345	0.317	0.33	0.287	0.341	0.286	0.322	0.361	0.353	0.371	0.418
PC ae C42:1	0.096	0.088	0.079	0.075	0.067	0.093	0.088	0.063	0.079	0.062	0.072	0.078	0.077	0.077	0.087	0.07	0.073	0.089	0.094	0.085	0.111	0.06	0.083	0.069	0.103	0.084	0.076	0.073	0.073	0.068	0.095	0.087	0.095	0.066	0.098	0.056	0.089	0.071	0.08	0.077	0.092	0.08	0.096	0.081	0.223	0.296	0.323	0.308	0.356
PC ae C42:2	0.2	0.286	0.098	0.265	0.155	0.104	0.136	0.13	0.085	0.102	0.094	0.183	0.074	0.107	0.178	0.121	0.23	0.115	0.207	0.076	0.09	0.146	0.069	0.189	0.103	0.111	0.128	0.261	0.291	0.084	0.149	0.114	0.102	0.258	0.258	0.077	0.111	0.086	0.106	0.1	0.175	0.115	0.183	0.117	0.253	0.284	0.241	0.252	0.291
PC ae C42:3	0.194	0.236	0.124	0.228	0.136	0.117	0.173	0.121	0.086	0.121	0.147	0.162	0.109	0.114	0.2	0.13	0.202	0.109	0.252	0.11	0.117	0.154	0.107	0.155	0.11	0.131	0.128	0.22	0.22	0.081	0.122	0.095	0.112	0.189	0.238	0.091	0.103	0.111	0.139	0.113	0.124	0.12	0.131	0.13	0.424	0.522	0.493	0.439	0.436
PC ae C42:4	0.143	0.155	0.046	0.177	0.1	0.077	0.107	0.072	0.043	0.066	0.077	0.163	0.026	0.057	0.132	0.076	0.166	0.091	0.135	0.048	0.079	0.108	0.075	0.134	0.03	0.085	0.076	0.172	0.17	0.045	0.106	0.071	0.039	0.199	0.181	0.052	0.064	0.054	0.059	0.054	0.153	0.086	0.136	0.093	0.594	0.752	0.759	0.718	0.621
PC ae C42:5	0.426	0.592	0.445	0.419	0.402	0.39	0.406	0.423	0.381	0.395	0.386	0.477	0.392	0.438	0.408	0.422	0.42	0.449	0.473	0.429	0.423	0.407	0.423	0.414	0.42	0.441	0.431	0.45	0.43	0.424	0.449	0.465	0.404	0.448	0.546	0.364	0.398	0.352	0.439	0.473	0.458	0.425	0.506	0.435	1.46	1.78	1.7	1.58	1.49
PC ae C44:3	0.062	0.078	0.058	0.084	0.054	0.074	0.075	0.045	0.059	0.075	0.064	0.062	0.059	0.061	0.056	0.069	0.076	0.055	0.09	0.058	0.093	0.064	0.088	0.079	0.076	0.081	0.058	0.077	0.095	0.038	0.051	0.068	0.073	0.086	0.079	0.053	0.062	0.059	0.065	0.081	0.071	0.058	0.089	0.058	0.17	0.203	0.168	0.188	0.198
PC ae C44:4	0.079	0.069	0.047	0.066	0.073	0.068	0.065	0.05	0.057	0.05	0.06	0.074	0.062	0.041	0.075	0.056	0.064	0.079	0.101	0.053	0.072	0.065	0.075	0.083	0.072	0.072	0.063	0.103	0.066	0.062	0.058	0.068	0.071	0.061	0.096	0.051	0.053	0.061	0.048	0.067	0.083	0.07	0.075	0.07	0.236	0.23	0.218	0.232	0.198
PC ae C44:5	0.073	0.086	0.07	0.082	0.074	0.063	0.078	0.059	0.059	0.078	0.064	0.082	0.07	0.064	0.075	0.064	0.072	0.088	0.084	0.071	0.079	0.065	0.073	0.061	0.067	0.093	0.067	0.073	0.081	0.08	0.07	0.058	0.065	0.067	0.107	0.074	0.086	0.065	0.072	0.055	0.07	0.065	0.086	0.056	0.566	0.732	0.688	0.742	0.658
PC ae C44:6	0.068	0.078	0.061	0.071	0.073	0.05	0.072	0.079	0.043	0.06	0.068	0.066	0.048	0.055	0.071	0.068	0.039	0.069	0.107	0.055	0.075	0.063	0.067	0.085	0.062	0.069	0.059	0.076	0.087	0.045	0.056	0.067	0.067	0.087	0.095	0.054	0.059	0.059	0.069	0.063	0.071	0.074	0.071	0.043	0.622	0.628	0.68	0.649	0.615
SM (OH) C14:1	4.39	4.05	3.21	3.29	4.5	4.41	4.79	3.28	3.44	4.07	3.75	4.18	3.37	4.04	3.79	4.12	3.53	3.59	5.11	4.22	4.61	3.73	3.49	3.09	3.52	3.94	3.84	4.1	4.04	4.12	3.54	4.12	3.32	4.08	3.55	3.24	3.72	3.37	4.25	3.88	3.79	3.88	2.98	3	2.49	3.06	2.6	2.68	2.57
SM (OH) C16:1	3.06	2.76	2.29	2.53	1.97	2.07	2.91	1.9	2.19	2.04	2.34	2.34	1.53	2.57	2.32	2.3	2.18	2.24	2.57	2.37	2.43	2.03	1.86	1.68	2.07	2.23	2.17	2.43	2.35	1.98	2.06	2.23	1.91	2.27	2.42	1.84	2.32	2.03	2.74	2.23	2	1.78	1.99	1.51	1.45	1.86	1.5	1.55	1.74
SM (OH) C22:1	2.79	2.85	2.2	2.16	2.92	2.78	2.91	2.01	2.47	2.27	2.27	2.05	1.71	2.36	2.96	2.19	2.17	1.9	2.71	2.7	2.18	1.79	1.82	1.77	1.94	1.81	1.51	1.53	2.4	2.25	1.76	2.49	1.95	1.6	2.59	1.7	2.01	2.17	2.51	1.89	1.61	1.6	2.27	1.83	4.4	5.71	5.25	5.37	4.91
SM (OH) C22:2	2.6	2.99	2.06	1.37	2.28	2.8	3.05	1.93	2.63	2.12	2.02	2.12	1.63	2.19	1.95	2.22	1.47	1.77	2.09	2.83	2.43	1.74	2.1	1.66	1.71	1.69	1.72	1.78	1.67	2.03	1.79	2.46	1.73	2.05	1.73	1.94	2.08	2.01	2.42	1.9	1.54	1.74	1.74	1.79	3.4	4.19	3.82	3.79	3.59
SM (OH) C24:1	0.75	0.782	0.427	0.398	0.568	0.435	0.552	0.328	0.414	0.416	0.498	0.42	0.323	0.509	0.581	0.512	0.47	0.432	0.545	0.466	0.442	0.428	0.345	0.358	0.348	0.323	0.358	0.44	0.531	0.455	0.41	0.493	0.292	0.533	0.471	0.334	0.379	0.472	0.481	0.404	0.396	0.339	0.49	0.372	0.438	0.594	0.517	0.459	0.553
SM C16:0	46.3	43.7	36.8	37.7	36.1	33.8	44	28.2	33.1	32.3	37	36.1	28.1	40.3	35.6	36.8	34.8	31.9	42	38.4	38	33.2	32.9	28.9	33	33.8	33.4	40.1	35.3	34.5	29.2	36.3	32.2	41.8	40.3	30.3	37.6	31.3	40.8	33.7	30	29.8	31	30.9	58.5	74.4	68	65.2	68.6
SM C16:1	0.288	0.241	0.217	0.212	0.279	0.21	0.261	0.173	0.218	0.195	0.238	0.208	0.164	0.25	0.218	0.309	0.203	0.227	0.382	0.234	0.236	0.178	0.199	0.17	0.227	0.207	0.211	0.282	0.243	0.184	0.173	0.199	0.212	0.248	0.578	0.186	0.285	0.179	0.262	0.187	0.185	0.204	0.22	0.18	8.29	9.78	9.33	9.3	8.76
SM C18:0	10.9	11.3	11.5	10.4	8.36	8.07	13.9	8.1	10.4	9.81	8.11	7.95	6.17	13.3	12.9	12	10.2	9.11	12.6	9.02	10	8.86	10.9	8.74	9.96	11.2	10.6	11.9	12.5	7.62	6.8	8.8	11.3	12.6	13.3	10.1	12.9	10.8	11.6	9.74	8.98	7.98	9.53	7.98	10.3	13.5	11.5	12.1	11.8
SM C18:1	0.414	0.35	0.248	0.201	0.257	0.298	0.359	0.222	0.212	0.294	0.271	0.21	0.26	0.344	0.312	0.437	0.297	0.202	0.6	0.31	0.313	0.216	0.276	0.199	0.314	0.29	0.285	0.312	0.3	0.324	0.287	0.308	0.357	0.31	0.538	0.253	0.392	0.298	0.333	0.237	0.218	0.239	0.225	0.238	5.33	6.82	6.08	5.98	5.35
SM C20:2	0.138	0.101	0.045	0.087	0.13	0.033	0.104	0.093	0.062	0.072	0.084	0.123	0.073	0.089	0.066	0.114	0.099	0.122	0.23	0.141	0.083	0.085	0.117	0.084	0.065	0.109	0.122	0.143	0.158	0.101	0.1	0.094	0.024	0.009	0.104	0.077	0.132	0.046	0.079	0.086	0.031	0.073	0.064	0.141	0.209	0.247	0.176	0.219	0.233
SM C22:3	0	0.394	0.245	0.011	0.257	0.322	0.605	0.328	0.306	0.264	0.335	0.226	0.136	0.094	0.451	0.31	0.013	0	0.417	0.322	0.363	0.475	0.198	0.128	0.395	0.349	0.058	0	0.117	0.193	0.485	0.328	0.128	0	0.084	0.092	0.385	0	0	0	0.123	0	0.131	0.26	0.393	0.729	0.35	0.519	0.244
SM C24:0	8.4	7.76	7.01	9.11	7.63	6.7	9.2	6.02	6.04	6.31	8.83	8.86	7.6	7.72	7.69	8.19	7.65	7.72	9.43	6.4	7.59	6.4	5.63	8.23	9.33	9.19	9.47	11.5	10.5	5.39	5.99	6.71	7.42	8.71	11.4	5.46	6.92	6.23	7.15	6.38	6.77	6.87	7.13	6.97	8.46	9.82	8.86	10.2	9.54
SM C24:1	13.6	16.7	10.2	8.82	10.1	13.7	14.5	7.76	11.5	10.6	9.81	9.13	6.59	9.65	9.44	8.99	8.32	8.24	9.57	13.1	9.45	8.19	9.67	7.5	7.72	6.54	8.14	8.29	7.9	10.4	7.78	10.7	9.66	10.2	11.1	8.56	9.41	9.88	9.07	8.39	6.82	7.81	8.42	9.17	17.3	21.6	21.5	17.5	18.2
SM C26:0	0.151	0.124	0.089	0.052	0.107	0.088	0.105	0.06	0.07	0.097	0.061	0.045	0.043	0.104	0.099	0.06	0.09	0.066	0.131	0.076	0.093	0.051	0.052	0.105	0.075	0.058	0.081	0.085	0.08	0.081	0.078	0.081	0.053	0.104	0.075	0.063	0.075	0.054	0.088	0.061	0.073	0.042	0.07	0.067	0.077	0.062	0.093	0.058	0.11
SM C26:1	0.18	0.22	0.137	0.125	0.185	0.172	0.159	0.12	0.137	0.125	0.15	0.115	0.078	0.179	0.149	0.118	0.149	0.142	0.18	0.141	0.149	0.118	0.072	0.144	0.092	0.112	0.109	0.154	0.106	0.149	0.125	0.204	0.143	0.167	0.154	0.14	0.117	0.116	0.154	0.106	0.146	0.108	0.098	0.117	0.131	0.184	0.179	0.17	0.175
H1	6458	6424	4299	4003	9442	9371	9827	3874	7360	3977	5669	7235	3612	7352	5942	5646	4071	4770	6740	6837	4077	4165	8982	6038	4061	7202	3941	6333	4097	7411	5594	3937	5798	3829	4860	3883	4656	4038	4549	4590	5153	3420	3379	6214	10759	12876	12811	12261	11460
[truncated: 166 more columns]

## Sheet: preprocessed_concentration_data
	10	11	12	13	18	19	20	21	22	23	24	25	26	27	28	29	30	31	32	33	34	35	36	37	38	39	40	41	42	43	44	45	46	47	48	49	50	51	52	53	54	55	56	57	106	107	108	109	110
C2	-0.780742	-1.20253	-0.127026	-1.02048	0.828729	-1.26117	-0.502109	0.418641	0.418641	1.57182	-0.910018	-1.05336	-0.808157	-0.127026	-0.108517	-0.459618	-0.196223	-0.6197	0.928707	0.154008	-1.60666	0.622713	-0.161244	0.270932	-0.291059	-0.548617	0.137056	0.377892	0.928707	-0.593958	-0.161244	-0.691965	0.220102	1.38071	-0.417426	0.694856	0.859814	0.999341	-0.717119	-0.340958	-0.196223	0.744492	-0.0591515	-0.6197	-1.09797	-0.981012	0.202454	1.38071	-1.48575
Ala	-0.417426	-0.525978	2.05264	1.03897	0.535445	0.799288	-0.525978	1.74295	0.10502	-1.09797	0.397843	0.516621	2.05264	-1.48575	-1.14703	-0.944384	0.457702	0.270932	-0.378998	-0.717119	-0.0117219	1.38071	0.377892	0.377892	-0.644082	-0.944384	0.457702	-0.525978	-1.02048	0.137056	0.999341	-0.340958	-0.808157	-0.780742	-0.30665	0.321373	1.30558	0.535445	-1.20253	0.47617	-0.502109	0.340544	-0.0285242	-0.359954	-0.179088	0.437555	0.828729	-0.981012	0.397843
Arg	-0.291059	0.799288	0.496782	-1.05336	-0.910018	0.202454	-0.84181	0.185757	0.859814	1.30558	-0.0442393	-0.84181	1.57182	-0.323149	-1.81114	-1.81114	0.892852	0.928707	-0.691965	-0.340958	-0.482862	1.74295	-0.378998	-1.39904	-0.108517	-0.717119	0.154008	-0.417426	-1.39904	-0.6197	0.321373	0.557168	-0.910018	-1.81114	-1.60666	1.57182	0.535445	0.622713	-0.417426	0.770812	0.16902	0.859814	0.928707	0.25234	-0.291059	0.220102	0.557168	0.646688	1.03897
Asn	-0.873398	-1.32578	0.321373	-0.459618	-0.213193	-0.666816	-1.48575	0.67192	-0.747255	-0.213193	-0.291059	-0.0117219	1.38071	-1.39904	-0.0117219	-0.717119	1.38071	1.74295	-0.291059	0.0390657	1.03897	1.18135	-0.459618	0.67192	0.185757	-0.747255	-0.0285242	-0.780742	-1.20253	-0.691965	-0.108517	-0.27137	-1.39904	-0.144836	0.120971	0.516621	0.270932	2.05264	-0.84181	1.74295	-0.717119	0.799288	0.770812	-0.502109	-0.459618	1.18135	0.10502	0.457702	-0.593958
Asp	0.377892	-0.253363	0.0728579	-0.30665	-0.233338	-0.233338	-0.873398	-0.438516	-0.30665	-0.108517	-0.0751109	1.57182	0.16902	-2.36526	0.67192	0.220102	0.646688	0.999341	-0.593958	-0.981012	1.08564	0.744492	-0.0117219	1.13285	0.496782	-0.417426	0.30507	-0.253363	-0.0442393	-0.127026	1.18135	-1.02048	-1.09797	-1.32578	0.0211458	0.10502	0.088708	0.340544	-0.0591515	0.557168	0.718977	-0.0751109	1.13285	0.999341	1.46252	1.57182	-0.873398	-0.84181	-1.81114
Cit	0.120971	-0.438516	0.770812	0.516621	-1.81114	-0.525978	-1.60666	0.622713	0.578176	1.46252	-0.417426	-1.20253	1.08564	0.202454	0.287434	-0.910018	1.74295	0.516621	-2.36526	0.744492	-0.323149	-0.0442393	-1.60666	-0.482862	0.799288	-0.570385	0.358919	-1.09797	-0.378998	-0.323149	0.287434	0.646688	-0.0920673	-0.398066	-0.6197	0.799288	0.0390657	0.235962	0.0558218	1.13285	-0.438516	1.03897	1.74295	-0.127026	0.557168	1.38071	1.74295	0.557168	-0.127026
Gln	-0.30665	-0.323149	0.557168	0.859814	0.137056	0.287434	-0.717119	1.38071	-0.398066	0.270932	-0.27137	-0.502109	-0.359954	-0.378998	0.928707	-0.359954	2.05264	0.744492	-1.39904	0.220102	1.38071	1.46252	0.270932	0.235962	-0.213193	-1.39904	-0.84181	-1.81114	-2.36526	-0.291059	0.0558218	-0.417426	-1.32578	-0.873398	0.137056	0.770812	0.578176	0.202454	0.496782	1.57182	0.340544	0.516621	1.03897	-1.14703	0.437555	2.05264	-1.14703	0.0211458	-0.398066
Glu	-1.48575	-1.60666	1.38071	0.496782	0.0728579	-0.944384	-0.691965	0.859814	-0.525978	0.25234	-0.253363	-0.213193	0.287434	-1.20253	-0.747255	-0.981012	0.694856	1.18135	0.185757	-1.81114	-0.0751109	0.340544	-1.48575	-0.981012	2.05264	-0.438516	0.928707	0.694856	-0.30665	0.16902	0.578176	0.088708	0.646688	1.74295	1.57182	-0.0442393	0.0211458	0.358919	-0.981012	-0.910018	-0.417426	0.578176	0.397843	0.287434	-0.482862	-0.0442393	1.24027	-0.0285242	-1.09797
Gly	0.622713	-0.179088	0.578176	-0.0920673	1.38071	-0.570385	-0.666816	-1.20253	-0.161244	-1.81114	0.358919	-0.780742	0.496782	0.965844	0.965844	1.74295	0.928707	-0.981012	-0.398066	-0.644082	-0.398066	-0.253363	0.340544	0.496782	0.47617	-0.179088	0.25234	-0.502109	-0.747255	0.202454	0.744492	0.358919	-0.144836	0.928707	-0.378998	0.235962	-0.944384	0.457702	1.18135	0.999341	1.24027	1.74295	-0.808157	0.10502	0.999341	1.74295	0.535445	-0.196223	-0.108517
His	-0.666816	0.00322246	-0.691965	-0.644082	-0.359954	-1.81114	-1.09797	0.120971	-0.127026	0.377892	-0.944384	-0.717119	0.437555	-1.26117	-0.808157	-1.48575	0.154008	0.496782	-0.548617	-0.0751109	0.358919	0.828729	0.0211458	0.137056	0.00322246	-0.340958	0.67192	0.892852	0.892852	0.47617	0.694856	0.859814	-0.30665	-0.30665	0.744492	0.744492	1.38071	1.30558	0.270932	1.38071	-0.666816	0.965844	0.30507	-0.780742	-0.323149	0.892852	0.321373	-0.161244	0.457702
Ile	-1.05336	-0.944384	0.340544	-1.20253	-0.417426	-0.0751109	-1.20253	0.928707	0.340544	-0.179088	-0.482862	-0.747255	1.24027	-0.253363	-1.32578	-1.60666	0.235962	1.30558	-0.213193	-1.05336	0.496782	1.13285	-0.340958	0.220102	0.16902	-0.808157	1.03897	-0.570385	-0.0751109	-0.398066	-0.502109	0.235962	-0.27137	0.377892	1.03897	0.25234	0.646688	0.828729	-0.944384	1.08564	0.377892	1.46252	0.202454	0.535445	-0.747255	0.578176	0.120971	0.358919	-0.213193
Leu	-1.60666	-1.14703	0.397843	-0.340958	-0.340958	-1.14703	-2.36526	0.694856	0.185757	0.154008	0.287434	-0.459618	0.578176	-1.09797	-1.26117	-1.20253	0.622713	1.46252	0.0390657	-0.780742	0.694856	1.24027	-0.873398	-0.0920673	0.358919	-0.644082	0.770812	0.0728579	0.601825	-0.459618	-0.417426	0.120971	-0.593958	0.828729	1.24027	0.601825	0.235962	0.496782	-0.525978	1.03897	-0.910018	1.30558	0.137056	0.718977	-0.808157	0.270932	-0.253363	0.287434	-0.30665
Lys	-1.26117	-1.26117	1.30558	-1.14703	-0.27137	-0.808157	-1.81114	0.601825	1.46252	0.235962	-0.30665	-0.944384	0.67192	-0.910018	-0.780742	-1.09797	0.828729	-0.0285242	-0.459618	-2.36526	1.57182	0.928707	-0.108517	0.770812	0.377892	0.25234	1.46252	0.557168	0.770812	0.418641	0.67192	0.418641	-0.84181	-0.808157	0.928707	1.03897	0.928707	0.744492	-1.32578	0.340544	0.270932	0.694856	0.496782	0.321373	-1.60666	-0.570385	-0.644082	-0.291059	-0.780742
Orn	-0.253363	-1.81114	-0.144836	-0.482862	0.377892	-0.108517	-1.32578	0.377892	0.120971	0.418641	-0.213193	-0.27137	-0.0442393	-0.0117219	1.18135	-0.0591515	0.999341	-0.108517	-0.780742	-0.548617	0.270932	-1.48575	-1.20253	1.18135	1.03897	-0.196223	0.744492	0.0390657	-0.340958	-0.644082	-0.340958	-0.593958	-0.0117219	1.46252	1.18135	0.287434	0.25234	0.965844	-0.593958	0.601825	-0.340958	-0.233338	1.57182	0.120971	-0.0591515	0.646688	1.13285	-0.6197	-2.36526
Phe	-1.02048	-0.717119	-0.0285242	-1.09797	-1.26117	-0.981012	-1.26117	-0.161244	0.892852	0.358919	-0.179088	-0.873398	0.694856	-0.808157	-1.60666	-1.26117	0.437555	0.828729	-0.0117219	-0.502109	0.0728579	1.03897	0.235962	0.120971	0.30507	-0.359954	1.57182	1.74295	1.38071	0.00322246	-0.747255	0.744492	-0.179088	0.646688	1.38071	0.999341	1.08564	0.0558218	-0.747255	0.744492	-1.60666	0.457702	-0.780742	0.418641	-0.548617	0.47617	-0.108517	-0.438516	-0.378998
Pro	-1.09797	-0.691965	0.828729	0.358919	-0.482862	-0.161244	-1.14703	1.46252	-0.378998	-0.482862	-0.359954	-0.910018	0.999341	-0.291059	-0.378998	-0.398066	1.24027	0.340544	-0.910018	-1.26117	0.418641	1.08564	0.16902	0.516621	-0.144836	-0.981012	0.718977	0.828729	-0.459618	-0.482862	-0.127026	0.25234	-1.60666	-0.944384	0.799288	0.859814	2.05264	1.38071	-0.808157	1.46252	-0.161244	0.67192	0.457702	-0.808157	-0.644082	0.622713	-0.233338	-0.108517	0.0558218
Ser	-0.0591515	-0.0117219	1.08564	0.16902	0.457702	0.770812	-1.05336	0.437555	0.0211458	-1.60666	1.46252	0.457702	1.30558	-0.213193	-1.05336	-0.780742	1.18135	0.47617	-1.26117	-0.873398	0.578176	0.67192	0.965844	0.578176	0.088708	-0.691965	0.120971	0.437555	0.437555	0.120971	0.10502	-0.0751109	-0.944384	-1.26117	-0.747255	0.496782	1.57182	1.13285	-0.30665	0.828729	0.578176	1.24027	-0.0117219	-0.84181	0.321373	1.46252	0.799288	-1.26117	0.25234
Thr	0.10502	-0.593958	-0.548617	-0.593958	-1.48575	-1.20253	-0.644082	-0.482862	0.202454	-1.02048	-0.0117219	0.47617	0.770812	0.557168	2.05264	1.30558	1.30558	0.622713	0.00322246	-0.6197	0.185757	0.718977	0.557168	-0.108517	0.578176	0.321373	0.999341	1.08564	1.46252	-0.944384	0.16902	-0.161244	0.16902	-0.253363	-0.233338	-0.459618	0.67192	0.718977	-0.340958	0.928707	0.202454	1.13285	-0.417426	-0.644082	0.397843	1.24027	0.892852	0.859814	-0.323149
Trp	-0.0285242	-0.108517	-0.233338	-0.981012	0.0558218	-0.691965	-0.747255	-2.36526	0.965844	-0.398066	-1.39904	-0.981012	-0.6197	0.535445	-0.196223	-0.233338	-0.359954	0.694856	0.744492	-1.02048	0.718977	0.965844	1.57182	1.30558	0.270932	0.377892	0.799288	0.67192	-0.253363	0.088708	0.47617	-0.108517	1.24027	0.321373	0.377892	-0.179088	0.437555	0.859814	-1.26117	-0.438516	-0.323149	-0.691965	-0.910018	0.828729	-0.0442393	0.496782	-0.459618	-0.213193	-0.0442393
Tyr	-0.0442393	-0.502109	0.892852	-0.0751109	-2.36526	-1.39904	-0.981012	0.770812	1.13285	-0.0591515	-0.127026	-0.0751109	1.13285	0.437555	-0.666816	-0.438516	0.377892	1.24027	-0.0751109	-0.233338	0.202454	0.10502	-0.27137	0.00322246	0.646688	0.0390657	1.74295	0.718977	0.828729	0.154008	0.0211458	0.287434	-1.14703	-0.691965	-0.0285242	-0.548617	0.694856	0.088708	-0.6197	0.892852	-0.378998	0.770812	-0.378998	0.16902	-0.196223	0.799288	0.646688	0.418641	-0.196223
Val	-1.81114	-1.39904	-0.0920673	-0.808157	-0.438516	-1.32578	-1.02048	-0.0920673	-0.233338	-0.717119	-0.144836	-0.570385	0.557168	-0.0591515	-0.910018	-0.482862	0.0390657	1.57182	-0.161244	-0.179088	0.137056	0.999341	0.457702	0.418641	0.235962	-0.525978	0.601825	0.601825	0.965844	-0.910018	-0.525978	0.0558218	0.10502	0.557168	1.30558	0.120971	0.770812	1.24027	0.744492	1.30558	-0.30665	1.57182	-0.27137	0.220102	-0.6197	0.185757	-0.84181	-0.398066	-0.84181
ADMA	-0.691965	-0.808157	1.13285	0.0390657	0.557168	-0.593958	-0.910018	0.220102	0.744492	0.718977	-1.02048	-1.81114	-0.161244	0.578176	-0.944384	-0.144836	0.965844	-1.48575	-0.108517	0.418641	-0.944384	0.088708	-1.02048	0.0390657	0.0728579	-0.459618	0.270932	0.744492	-0.398066	0.578176	0.718977	0.718977	-0.459618	0.25234	0.220102	1.38071	0.999341	0.47617	-2.36526	-0.570385	-0.6197	0.646688	0.358919	0.457702	-0.873398	-0.378998	0.457702	0.340544	-0.417426
Carnosine	-0.84181	-0.6197	-0.27137	-1.39904	-0.548617	-0.291059	0.154008	0.799288	0.999341	0.30507	0.25234	0.220102	0.535445	1.13285	0.235962	-0.196223	-0.0117219	-1.20253	-0.179088	-0.27137	-1.39904	0.358919	0.859814	0.744492	-0.233338	-0.233338	0.0728579	0.770812	-0.144836	0.10502	0.622713	-0.548617	1.38071	1.08564	-0.27137	1.46252	1.46252	0.770812	-1.48575	-1.81114	-1.05336	-1.60666	-0.196223	-0.717119	-0.691965	-0.808157	-1.09797	-0.459618	-0.944384
Creatinine	0.0558218	-0.196223	-0.0117219	-1.26117	0.120971	0.0558218	0.202454	-0.0591515	1.57182	0.557168	-1.26117	-1.26117	-0.717119	0.622713	0.088708	0.437555	0.557168	-0.747255	-0.417426	0.828729	-1.81114	-0.6197	-0.570385	0.25234	-0.981012	-0.666816	-0.398066	-0.0920673	-1.14703	0.828729	1.46252	0.622713	0.496782	0.120971	0.154008	2.05264	0.965844	-0.196223	-1.60666	-1.48575	-0.84181	-0.717119	-0.179088	0.397843	0.25234	0.202454	1.18135	0.137056	-0.0285242
Kynurenine	0.496782	0.340544	-0.291059	-0.0117219	1.13285	0.25234	-0.340958	-1.09797	1.24027	-0.691965	-0.84181	-0.482862	-1.32578	-1.32578	-0.359954	0.202454	-1.39904	0.16902	0.770812	-0.161244	-0.910018	-1.14703	0.828729	0.185757	-1.14703	-1.26117	-0.253363	2.05264	0.646688	1.74295	1.30558	1.08564	0.965844	-0.644082	0.694856	0.718977	-0.808157	0.220102	-1.05336	-1.32578	-1.48575	-2.36526	0.0390657	1.57182	0.496782	0.340544	0.220102	-0.502109	0.0728579
Met-SO	-0.6197	-0.873398	-1.26117	-1.32578	-0.808157	-0.398066	-0.944384	1.57182	-0.144836	0.185757	-0.323149	-0.666816	-0.30665	-0.780742	-0.525978	-0.323149	-0.570385	2.05264	-1.09797	-0.944384	-1.20253	-0.233338	-0.84181	-0.144836	-0.548617	-0.873398	-0.666816	1.38071	-1.32578	-0.747255	0.088708	0.928707	-0.717119	-1.09797	1.13285	0.457702	1.74295	1.03897	0.120971	2.05264	-0.525978	2.05264	-0.161244	-0.0117219	0.0558218	0.287434	0.601825	-0.27137	0.137056
Putrescine	-2.36526	0.0211458	0.30507	0.321373	-0.179088	-1.02048	-0.398066	2.05264	-0.459618	0.437555	-1.09797	-0.108517	-0.340958	0.235962	0.0211458	-1.02048	0.799288	-0.417426	0.202454	0.601825	-1.26117	-0.84181	-0.593958	0.0558218	-0.196223	-0.127026	0.496782	1.46252	0.578176	-0.0117219	0.535445	0.220102	0.00322246	0.799288	0.718977	0.928707	0.137056	-0.780742	-1.39904	-0.84181	0.185757	0.47617	-0.0751109	1.03897	-0.0751109	-0.253363	0.770812	0.601825	-0.0751109
Sarcosine	1.08564	-2.36526	1.03897	0.67192	0.646688	-2.36526	-0.127026	0.744492	2.05264	-2.36526	0.646688	-2.36526	1.46252	0.646688	-2.36526	1.13285	1.08564	1.38071	-0.0285242	1.57182	1.46252	1.57182	-2.36526	0.892852	0.321373	-0.0591515	0.377892	1.18135	-0.981012	-0.30665	1.13285	0.535445	0.516621	0.516621	0.25234	0.646688	0.601825	0.578176	-0.644082	0.694856	-1.81114	0.828729	1.24027	1.74295	0.287434	0.235962	0.496782	0.270932	-0.340958
SDMA	-0.378998	-0.340958	-0.666816	-0.323149	-0.291059	0.137056	-0.780742	0.10502	0.516621	0.744492	-0.378998	-0.691965	0.220102	-0.233338	-0.548617	0.16902	0.516621	-0.84181	-0.233338	-0.0285242	-0.808157	2.05264	-0.482862	0.694856	-0.359954	-0.84181	-0.161244	-0.0591515	-0.438516	-0.340958	0.397843	-0.0117219	-0.482862	-0.459618	-0.291059	1.08564	-0.196223	-0.0751109	2.05264	-1.05336	-0.482862	0.30507	-0.0442393	0.770812	0.30507	0.358919	-2.36526	0.828729	0.358919
Serotonin	-0.144836	0.496782	1.74295	0.828729	1.46252	-1.48575	0.965844	-0.525978	1.30558	1.38071	-0.108517	-1.60666	-0.780742	-1.81114	-0.0285242	-2.36526	1.46252	-0.359954	-0.196223	0.0558218	0.377892	1.30558	-1.26117	1.74295	0.457702	-0.291059	-0.27137	1.03897	-0.233338	-1.60666	-0.213193	-0.644082	-1.48575	-0.291059	-1.20253	1.13285	-1.39904	0.0728579	-0.910018	-2.36526	1.03897	-0.144836	1.38071	1.46252	0.088708	-0.0920673	-0.398066	-0.179088	0.321373
t4-OH-Pro	-0.548617	0.928707	0.744492	-0.873398	0.358919	-0.6197	-0.808157	-0.570385	1.18135	0.535445	-0.548617	-1.14703	0.00322246	1.08564	-0.502109	0.418641	0.578176	-2.36526	-1.81114	-0.459618	-1.32578	-0.0751109	0.418641	0.799288	-1.02048	-1.20253	0.397843	0.965844	-0.717119	0.287434	0.358919	1.74295	-0.525978	0.0728579	0.67192	1.74295	1.24027	-0.0117219	-0.127026	0.397843	-0.27137	0.928707	-0.438516	0.235962	-0.502109	-0.0285242	-0.359954	1.74295	1.08564
Taurine	-0.196223	-1.48575	0.718977	2.05264	-1.14703	-0.84181	-0.30665	0.154008	0.799288	0.47617	0.859814	0.437555	0.646688	-0.548617	0.496782	0.744492	1.57182	-1.26117	-0.873398	-1.09797	-0.161244	-0.291059	0.120971	0.928707	0.694856	0.535445	1.30558	-0.398066	0.0211458	-0.213193	-0.27137	-0.0442393	-0.0285242	-0.548617	0.859814	0.67192	0.622713	0.397843	-1.81114	-0.981012	-0.644082	-0.482862	0.535445	0.437555	0.744492	0.859814	0.744492	-0.944384	-1.26117
lysoPC a C16:0	-0.910018	-1.02048	-0.910018	-0.213193	1.24027	-0.127026	-0.6197	-0.944384	-0.0920673	-0.780742	-0.502109	-0.398066	-1.05336	-0.144836	-1.48575	-0.30665	-1.02048	0.799288	-0.666816	0.718977	0.799288	-0.0591515	1.24027	1.38071	1.30558	0.622713	1.08564	0.16902	-0.570385	-0.196223	-0.548617	0.202454	-0.323149	-1.20253	0.397843	0.0211458	-0.144836	1.46252	0.828729	-0.0751109	0.0558218	1.18135	-0.482862	-0.910018	-1.26117	-1.39904	0.0390657	-1.20253	-1.60666
lysoPC a C16:1	-1.39904	-1.05336	-1.20253	-1.48575	1.74295	-0.213193	-0.378998	-1.60666	0.16902	0.202454	-0.873398	-0.0920673	-0.981012	-0.6197	-0.717119	-0.873398	-2.36526	0.235962	0.340544	0.535445	0.10502	-0.161244	0.770812	2.05264	0.154008	0.185757	-0.144836	-0.0442393	-0.179088	-1.05336	-0.359954	-0.482862	1.30558	1.30558	0.646688	0.0390657	0.358919	1.74295	-0.359954	-0.525978	-0.0442393	0.120971	-0.502109	0.137056	-2.36526	-2.36526	-0.570385	-1.14703	-1.32578
lysoPC a C17:0	-0.525978	-1.09797	-0.717119	-0.570385	0.202454	-0.0117219	-0.593958	0.0728579	0.377892	-0.0442393	-0.691965	-0.196223	-1.02048	-0.0920673	-1.02048	-1.32578	-0.873398	0.418641	-1.60666	0.397843	1.30558	-0.196223	0.47617	1.46252	1.57182	0.16902	0.535445	0.00322246	-0.593958	0.0390657	0.646688	0.694856	-0.0591515	-1.02048	-0.340958	-0.0117219	-0.0920673	0.799288	0.220102	-0.417426	-0.0751109	0.397843	0.25234	0.622713	-0.593958	-1.81114	0.622713	-0.666816	-1.14703
lysoPC a C18:0	-0.161244	-0.378998	-0.459618	-0.179088	-0.780742	-0.417426	-0.570385	-0.981012	0.622713	0.220102	-0.593958	-0.0591515	-2.36526	-0.0285242	-0.6197	-1.05336	-0.780742	-0.161244	-1.48575	-0.291059	0.828729	0.25234	2.05264	1.24027	0.965844	0.202454	0.557168	0.622713	0.30507	-0.417426	-0.323149	0.10502	0.928707	-0.27137	1.08564	-0.84181	0.799288	1.57182	-0.438516	-0.780742	0.0728579	-0.0442393	0.120971	0.67192	-0.944384	-0.944384	0.859814	0.235962	-0.981012
lysoPC a C18:1	0.437555	-0.27137	-0.340958	0.10502	0.622713	-0.459618	-0.253363	-0.548617	0.154008	-0.808157	0.0728579	-0.417426	-0.747255	0.16902	-1.20253	0.00322246	-0.502109	0.892852	-0.253363	0.10502	0.67192	-0.127026	0.799288	0.859814	1.46252	0.718977	0.828729	1.13285	0.557168	-1.09797	-0.910018	-0.291059	0.578176	-0.0751109	0.601825	-2.36526	0.516621	0.892852	0.185757	-0.0920673	0.235962	0.892852	-0.747255	-0.691965	-0.233338	-0.644082	1.46252	-1.32578	-0.747255
lysoPC a C18:2	-0.482862	0.235962	0.47617	0.235962	-0.253363	-0.359954	0.0211458	-0.417426	0.694856	0.799288	-0.780742	-1.48575	-1.81114	0.516621	-0.84181	-0.502109	-0.438516	0.377892	0.088708	-0.808157	-0.0285242	0.321373	1.38071	0.437555	0.67192	-0.253363	-0.127026	0.578176	-0.108517	-1.14703	-1.60666	-0.398066	1.57182	0.10502	0.965844	-0.6197	0.557168	1.08564	0.418641	-0.108517	-0.873398	0.088708	-0.691965	-0.398066	-1.39904	-1.60666	0.928707	-0.0442393	-0.179088
lysoPC a C20:4	-0.944384	0.30507	0.377892	0.287434	0.418641	0.00322246	0.088708	-1.39904	0.718977	0.601825	-0.717119	-1.02048	-0.873398	0.67192	-1.39904	-0.747255	-1.81114	0.202454	-0.0591515	0.235962	-0.717119	0.30507	0.622713	0.47617	0.120971	-0.910018	0.185757	-0.127026	-0.6197	-0.0442393	-0.808157	0.892852	0.859814	-0.6197	1.74295	0.377892	0.0728579	0.601825	0.088708	0.120971	-2.36526	1.38071	0.828729	0.496782	-0.910018	-0.84181	-0.127026	-0.127026	0.47617
PC aa C28:1	0.397843	0.622713	-1.60666	-2.36526	0.770812	0.557168	-0.323149	-0.108517	0.601825	1.18135	0.088708	-0.291059	-0.27137	0.718977	0.137056	0.10502	-0.144836	0.10502	0.622713	-0.593958	1.74295	0.578176	0.67192	0.622713	0.516621	-0.6197	-0.179088	-0.196223	-0.808157	-0.548617	-1.48575	-0.570385	-0.417426	0.0390657	0.0558218	-0.161244	0.496782	-0.323149	-0.179088	-1.39904	-1.09797	-1.26117	0.67192	-1.48575	0.965844	0.30507	1.38071	0.892852	0.377892
PC aa C30:0	-0.213193	0.457702	0.088708	-0.525978	0.437555	0.0390657	0.120971	-0.747255	0.47617	-0.0751109	0.694856	-0.438516	0.516621	-0.502109	-0.981012	-0.691965	0.10502	0.30507	0.892852	1.03897	2.05264	0.694856	-0.691965	-0.127026	0.622713	0.47617	0.0558218	-0.323149	-0.0920673	0.30507	-0.944384	0.0211458	-0.666816	0.47617	-0.644082	-0.691965	-1.81114	-1.81114	0.965844	-0.398066	-0.548617	-0.502109	0.154008	-0.482862	1.30558	0.928707	0.0728579	0.30507	0.418641
PC aa C32:0	0.0390657	0.892852	0.418641	0.694856	-0.0442393	0.47617	0.770812	0.0211458	0.00322246	0.00322246	0.892852	-0.233338	0.358919	-1.02048	-0.593958	-0.548617	0.16902	0.220102	1.18135	0.30507	-0.0920673	0.892852	-0.196223	-1.20253	-0.910018	-0.144836	-0.691965	-0.291059	0.535445	-0.570385	-1.81114	0.16902	-1.20253	-0.747255	-1.26117	-0.359954	0.10502	-1.39904	0.578176	0.25234	-0.253363	0.220102	-0.593958	0.358919	0.535445	0.516621	-0.691965	0.999341	0.718977
PC aa C32:1	-0.808157	-0.548617	-0.873398	-0.6197	1.57182	0.220102	0.358919	0.16902	-1.48575	-0.525978	0.10502	0.154008	0.928707	-0.398066	-0.179088	-0.417426	-0.981012	0.646688	2.05264	-0.0442393	-0.0442393	0.0211458	-0.0751109	-0.502109	-0.0920673	-0.0117219	-0.0751109	0.120971	-0.359954	0.0728579	-0.398066	-0.910018	0.377892	1.18135	-0.323149	-0.378998	-0.0591515	-0.127026	-0.0117219	-0.144836	0.154008	0.0211458	-0.873398	-0.213193	-0.30665	-0.502109	-1.39904	-0.0591515	-0.873398
PC aa C32:2	0.535445	-0.0285242	0.235962	0.418641	0.999341	-0.179088	0.25234	-0.808157	-0.291059	0.67192	0.270932	0.088708	0.828729	0.088708	-0.291059	0.0558218	-0.0442393	0.437555	1.30558	0.557168	-0.417426	-0.323149	-1.39904	-0.873398	-0.438516	0.30507	-0.0920673	-0.482862	-0.196223	0.235962	-1.39904	-0.525978	0.185757	2.05264	-0.438516	-0.291059	-1.26117	-1.05336	0.622713	-0.179088	-0.747255	-0.548617	-1.81114	-0.0285242	0.00322246	-0.196223	-0.213193	0.516621	-0.0591515
PC aa C32:3	0.154008	0.137056	1.18135	0.928707	-0.30665	-0.27137	0.321373	0.088708	1.38071	2.05264	-0.233338	0.202454	0.0558218	0.418641	0.718977	0.578176	0.137056	0.0390657	0.270932	-1.32578	-0.747255	-0.0285242	0.220102	-0.30665	-2.36526	-1.14703	-1.48575	-1.48575	-0.944384	0.718977	0.340544	0.0728579	0.622713	1.13285	0.202454	0.47617	-1.60666	-2.36526	1.38071	0.965844	0.601825	0.154008	-1.20253	-1.20253	-0.161244	-0.438516	-0.27137	0.16902	0.202454
PC aa C34:1	-0.179088	-0.910018	0.220102	0.601825	1.03897	0.235962	0.0390657	0.25234	-0.944384	-1.48575	1.38071	0.67192	1.74295	-0.27137	-0.0920673	0.892852	-0.0751109	1.13285	1.08564	0.67192	-0.127026	-0.438516	-0.0920673	-0.0751109	0.770812	1.03897	0.437555	-0.161244	0.235962	-0.525978	-1.20253	-0.944384	-0.340958	0.235962	-0.666816	-1.20253	-0.780742	-0.179088	-0.0751109	0.0558218	0.67192	0.287434	-0.981012	-1.26117	0.578176	0.557168	-0.30665	-0.417426	-0.910018
PC aa C34:2	-0.0751109	-0.0442393	0.601825	0.340544	0.928707	0.0211458	0.270932	0.137056	-1.81114	-0.944384	0.965844	1.03897	0.0390657	-0.0442393	0.418641	0.828729	-0.27137	0.67192	0.397843	0.25234	-0.548617	-1.02048	0.535445	-1.32578	-0.0117219	1.30558	0.16902	-0.213193	0.744492	0.270932	-1.09797	-0.84181	-0.438516	-0.323149	-0.84181	-0.944384	-0.482862	-0.502109	0.516621	0.457702	0.321373	-0.438516	-0.144836	-0.108517	0.340544	0.154008	-0.910018	0.694856	-0.502109
PC aa C34:3	-1.32578	-0.981012	-0.944384	0.0211458	1.30558	0.694856	0.0728579	-0.144836	-2.36526	-0.27137	-0.808157	0.859814	0.340544	-0.747255	0.358919	0.321373	-0.644082	0.397843	0.965844	0.088708	-0.593958	-1.26117	0.744492	0.30507	-0.502109	0.270932	-0.459618	-0.459618	0.47617	-0.502109	-0.644082	-1.20253	1.08564	0.744492	0.10502	-0.144836	0.185757	0.67192	0.00322246	0.16902	0.30507	-0.179088	0.418641	0.00322246	-1.32578	-1.26117	-1.60666	-0.482862	-1.39904
PC aa C34:4	-0.644082	-0.417426	-0.981012	0.00322246	0.965844	0.601825	0.646688	-0.196223	-1.14703	0.340544	-0.747255	0.30507	0.30507	-0.196223	1.30558	0.0390657	-1.32578	-0.253363	0.437555	-0.378998	-0.691965	-0.910018	0.185757	0.0728579	-1.05336	-0.502109	-0.944384	-1.02048	-0.213193	-0.108517	-0.179088	-1.14703	2.05264	1.57182	0.437555	-0.0591515	1.13285	0.646688	-0.253363	0.088708	0.516621	-0.161244	-0.108517	-0.27137	-1.02048	-1.02048	-1.02048	-0.808157	-0.438516
PC aa C36:1	0.30507	-0.644082	0.859814	0.718977	-0.666816	-0.30665	0.287434	0.235962	-0.253363	-0.417426	2.05264	0.718977	0.859814	0.397843	0.578176	0.694856	0.0211458	0.718977	0.535445	-0.359954	0.0390657	0.00322246	0.137056	-0.570385	0.859814	0.928707	0.340544	0.25234	0.418641	-0.873398	-0.196223	-1.05336	0.437555	0.418641	-0.108517	-1.60666	-0.502109	-0.233338	-0.666816	-0.459618	0.965844	-0.378998	-0.233338	-0.378998	1.18135	1.13285	0.16902	0.397843	-0.6197
PC aa C36:2	1.03897	1.30558	0.622713	-0.502109	0.0390657	-0.323149	-0.482862	0.578176	-0.359954	-0.291059	0.928707	1.30558	-0.179088	0.694856	1.38071	0.859814	-0.84181	0.535445	0.0728579	0.185757	-0.84181	-1.32578	1.08564	-1.60666	-0.84181	0.457702	-0.780742	-0.873398	0.622713	-0.378998	-0.253363	-1.81114	-0.213193	-0.233338	-0.593958	0.0728579	-0.644082	-1.02048	0.694856	0.377892	1.57182	-1.05336	0.799288	0.516621	-0.0285242	0.377892	-0.417426	0.496782	-0.161244
PC aa C36:3	2.05264	0.154008	0.25234	0.622713	0.185757	-0.0442393	0.535445	-0.0285242	-0.570385	-0.548617	1.03897	0.578176	0.601825	0.154008	0.557168	0.25234	-0.0920673	0.154008	0.25234	-0.398066	0.120971	-0.482862	0.088708	-0.717119	0.220102	1.18135	0.202454	0.0558218	1.03897	-0.780742	-1.14703	-2.36526	0.340544	0.16902	-0.691965	-1.39904	0.16902	-0.0442393	0.0390657	-0.0285242	0.418641	-0.593958	0.0728579	0.0728579	0.859814	1.08564	0.965844	0.202454	0.0390657
PC aa C36:4	0.859814	0.601825	0.535445	1.18135	-0.0117219	-0.0285242	1.13285	0.202454	-0.340958	-0.378998	0.418641	-0.0442393	0.457702	0.10502	0.694856	0.358919	0.0728579	0.25234	-1.02048	-0.0591515	-0.213193	0.235962	-0.127026	-0.253363	-0.0442393	0.770812	0.220102	-0.359954	0.137056	-1.26117	-1.05336	-1.60666	0.744492	0.437555	-0.161244	-1.02048	0.397843	0.154008	0.67192	0.418641	0.622713	0.235962	-0.717119	0.154008	1.08564	0.965844	0.578176	0.578176	0.535445
PC aa C36:5	-0.127026	-0.233338	-0.359954	0.646688	0.516621	0.377892	1.24027	0.718977	-0.981012	-0.502109	-1.32578	0.928707	-0.0591515	0.137056	0.535445	0.457702	-0.108517	0.120971	-1.05336	0.00322246	-0.340958	-0.548617	0.0558218	-0.459618	-0.808157	0.287434	0.088708	-0.179088	0.220102	-1.02048	-0.0751109	-1.39904	1.18135	-0.196223	-0.570385	-0.644082	0.47617	0.694856	1.57182	0.859814	0.859814	0.718977	0.377892	0.744492	-0.666816	-0.593958	-0.196223	-0.570385	-0.253363
PC aa C36:6	-1.20253	-0.780742	-1.05336	-0.378998	0.088708	0.859814	0.601825	-0.359954	-1.05336	0.0211458	-1.14703	1.24027	0.137056	-1.05336	0.321373	0.270932	-0.459618	-0.127026	-0.944384	0.0211458	-0.502109	-0.593958	0.25234	0.154008	-0.944384	-0.213193	-0.291059	0.137056	1.74295	-0.666816	-0.0285242	-1.26117	1.74295	-0.213193	0.00322246	0.137056	0.744492	1.18135	1.74295	1.18135	0.928707	0.557168	0.999341	0.377892	-1.20253	-1.20253	-1.20253	-0.873398	-1.02048
PC aa C38:0	-0.570385	0.718977	-0.6197	0.557168	-0.84181	0.622713	-0.27137	-0.27137	-0.323149	0.928707	0.516621	1.46252	-0.0285242	0.859814	0.744492	-0.0442393	0.120971	-1.39904	0.646688	-1.20253	-0.144836	-0.213193	-0.417426	-0.666816	1.74295	0.340544	-0.30665	0.0211458	0.694856	0.744492	0.437555	1.03897	0.358919	-0.570385	-0.359954	-1.32578	-0.417426	-0.944384	-1.09797	-0.666816	-0.291059	-0.0591515	0.557168	-0.161244	0.457702	-0.233338	1.08564	0.437555	0.799288
PC aa C38:3	0.516621	-0.459618	-0.593958	-0.691965	-0.0591515	-0.747255	0.557168	0.457702	-0.593958	-0.981012	0.578176	1.13285	0.965844	-0.359954	0.892852	0.770812	-1.26117	-0.30665	0.10502	0.16902	0.744492	-0.691965	-0.291059	0.358919	0.718977	1.74295	0.892852	0.496782	1.30558	-0.717119	0.235962	-0.808157	0.718977	0.622713	0.321373	-1.48575	-0.0285242	-0.0285242	-0.398066	0.00322246	1.38071	-0.0920673	0.718977	-0.291059	0.235962	-0.108517	0.0211458	-0.910018	-0.808157
PC aa C38:4	0.418641	0.47617	0.516621	0.220102	-0.593958	0.418641	0.744492	-0.179088	-0.417426	-0.747255	-0.6197	0.358919	0.321373	-0.981012	0.25234	-0.666816	-0.717119	-0.233338	-0.84181	0.770812	0.287434	0.220102	1.13285	-0.691965	-0.482862	0.744492	-0.644082	-0.30665	0.340544	-0.161244	0.0728579	-0.359954	0.457702	0.358919	0.16902	-0.417426	-0.27137	0.120971	-0.27137	-0.30665	1.18135	-0.459618	0.859814	0.694856	-0.213193	-0.666816	-0.438516	0.00322246	0.287434
PC aa C38:5	-0.981012	-0.30665	-0.196223	0.397843	0.340544	0.892852	0.928707	0.892852	-1.09797	-0.84181	-1.20253	0.999341	0.088708	-0.644082	0.377892	-0.27137	-1.20253	-0.717119	-0.6197	0.646688	0.220102	-0.502109	0.999341	-0.196223	-0.323149	0.646688	-0.196223	-0.548617	0.397843	-0.253363	-0.233338	-0.666816	0.67192	0.185757	0.30507	-0.438516	0.321373	0.16902	0.154008	0.154008	1.30558	0.0390657	1.08564	1.08564	-1.14703	-1.05336	-1.48575	-1.60666	-0.644082
PC aa C38:6	-0.502109	0.358919	-0.253363	0.30507	0.694856	1.08564	1.30558	0.358919	-0.780742	-0.666816	-1.81114	0.120971	-0.291059	-0.666816	-0.161244	-0.525978	-0.548617	-0.0920673	-1.32578	0.694856	0.154008	-0.0117219	0.718977	0.088708	-0.593958	0.235962	-0.213193	-0.981012	-0.84181	0.377892	0.154008	-0.127026	0.694856	0.137056	0.557168	-0.525978	0.154008	0.00322246	0.799288	0.235962	0.694856	0.358919	0.340544	0.965844	-0.525978	-0.691965	-0.780742	-0.593958	0.30507
PC aa C40:2	0.358919	-0.570385	0.00322246	0.0558218	0.25234	-0.378998	0.516621	-0.6197	0.287434	-0.873398	1.57182	0.965844	0.799288	-0.570385	-0.323149	1.18135	-0.747255	0.088708	-0.717119	-1.48575	-0.27137	-0.340958	0.437555	-0.233338	1.38071	1.46252	0.578176	0.799288	0.67192	-1.20253	0.270932	-0.6197	0.0728579	-0.0117219	0.418641	-0.717119	0.418641	0.516621	-0.0920673	0.496782	0.0211458	0.622713	0.10502	0.30507	0.694856	1.03897	0.340544	-0.323149	0.235962
PC aa C40:3	-0.0117219	-0.161244	-0.747255	0.25234	0.154008	-0.780742	-0.0117219	0.321373	-0.108517	-1.05336	1.13285	1.18135	1.18135	-0.482862	0.601825	0.601825	-0.482862	-0.323149	-0.808157	-0.213193	0.646688	-0.459618	-0.233338	0.321373	1.08564	1.57182	0.965844	0.270932	1.13285	-1.39904	0.30507	-0.378998	0.397843	0.694856	0.185757	-0.910018	0.892852	-0.0920673	-0.233338	0.437555	0.646688	0.185757	0.437555	-0.323149	0.120971	0.16902	-0.6197	-0.747255	-0.691965
PC aa C40:4	0.00322246	0.185757	0.10502	0.202454	-1.05336	-0.644082	-0.179088	0.00322246	-0.196223	-1.32578	0.30507	0.799288	0.892852	-0.340958	0.202454	0.185757	-1.60666	-0.144836	-0.482862	1.13285	0.770812	-0.747255	0.601825	-0.525978	0.437555	2.05264	0.516621	0.202454	1.18135	0.397843	0.516621	0.185757	0.47617	0.00322246	0.622713	-1.81114	-0.233338	-0.398066	0.47617	0.321373	1.74295	0.270932	0.694856	0.0211458	-0.0117219	-0.417426	-0.808157	-0.717119	-0.482862
PC aa C40:5	-0.459618	0.67192	-0.644082	-0.0591515	-0.981012	0.535445	0.00322246	-0.233338	0.137056	-0.459618	-2.36526	0.321373	-0.398066	-0.525978	0.437555	-0.6197	-0.944384	-1.02048	-0.323149	0.892852	0.535445	0.0390657	1.46252	-0.747255	-0.570385	0.0211458	-0.378998	-0.717119	0.10502	1.13285	1.74295	0.999341	-0.502109	-1.14703	-0.548617	-0.398066	-0.213193	0.137056	-0.548617	-0.213193	2.05264	-0.0285242	1.30558	2.05264	-0.981012	-1.09797	-1.05336	-1.05336	0.859814
PC aa C40:6	-0.398066	0.694856	0.137056	-0.780742	-0.944384	1.24027	0.999341	0.287434	-0.0751109	-0.30665	-1.48575	0.418641	-0.108517	-0.717119	0.859814	0.0211458	-1.14703	-1.32578	-1.20253	0.965844	1.13285	0.535445	1.30558	-0.548617	-0.873398	-0.108517	-0.808157	-1.26117	-0.666816	0.799288	1.08564	0.601825	0.154008	-0.981012	-0.0117219	-0.253363	-0.323149	-0.340958	0.10502	0.0390657	1.08564	-0.30665	2.05264	1.38071	-0.780742	-1.14703	-0.666816	-0.691965	0.646688
PC aa C42:0	-0.233338	-0.213193	-0.0751109	0.137056	-0.570385	-0.144836	-0.548617	0.646688	0.535445	0.0390657	0.828729	0.340544	-0.196223	0.457702	0.270932	-0.179088	0.25234	-0.27137	-0.27137	0.321373	0.16902	0.47617	0.397843	0.535445	-0.0285242	0.154008	-0.0442393	-0.84181	-0.525978	0.437555	0.220102	-0.780742	0.0390657	-0.84181	-1.32578	0.340544	-0.438516	0.321373	-0.570385	-0.233338	0.220102	-0.27137	0.185757	-0.0920673	0.892852	0.828729	-1.81114	1.08564	0.496782
PC aa C42:1	0.16902	0.220102	-1.02048	1.13285	0.496782	0.437555	0.235962	-0.30665	-0.910018	-0.0117219	-0.0920673	-0.30665	-0.944384	-0.161244	0.999341	0.377892	0.496782	-0.0591515	0.578176	-0.253363	1.18135	0.154008	-0.502109	1.08564	0.340544	0.397843	-1.32578	-0.808157	0.999341	0.557168	0.120971	-1.48575	-0.873398	0.0211458	-0.717119	0.437555	0.00322246	0.30507	-0.0285242	-0.691965	-0.593958	-1.48575	0.646688	-0.0591515	0.799288	0.25234	-0.144836	0.47617	-0.570385
PC aa C42:4	0.202454	0.418641	-1.48575	0.0728579	-0.873398	0.358919	-0.459618	0.0558218	0.0728579	1.08564	-0.196223	0.0211458	-0.127026	0.377892	-0.438516	-0.291059	-0.233338	-0.570385	-0.644082	-0.525978	0.557168	0.397843	1.03897	1.57182	0.25234	-0.27137	-0.482862	0.646688	-0.0285242	-0.0591515	-0.570385	0.47617	-0.233338	-0.417426	-0.482862	0.185757	0.828729	0.0390657	-0.780742	-0.548617	-0.0591515	0.601825	0.601825	-0.438516	0.646688	-0.873398	-0.0920673	1.18135	0.270932
PC aa C42:5	-0.747255	-0.0751109	-1.81114	0.120971	-0.196223	-1.09797	-0.417426	-0.502109	0.358919	-0.593958	-0.981012	1.08564	-0.0117219	0.0728579	1.08564	1.08564	-0.593958	0.00322246	-0.0442393	1.24027	-0.378998	-0.666816	0.578176	-0.0285242	-0.179088	0.496782	0.10502	-0.108517	-0.161244	0.928707	2.05264	1.13285	-0.691965	-1.05336	-0.0591515	0.30507	0.718977	0.557168	1.24027	-0.717119	1.13285	0.999341	-0.548617	0.892852	-1.81114	-0.213193	-0.981012	-2.36526	-0.233338
PC ae C30:0	0.270932	0.25234	-0.323149	-0.291059	0.321373	0.10502	-0.161244	-0.0442393	0.437555	0.397843	0.601825	0.185757	-0.0920673	0.0211458	-1.09797	-1.39904	0.30507	0.965844	0.694856	0.0728579	0.965844	0.516621	-1.32578	-0.808157	0.828729	0.516621	0.694856	0.10502	0.202454	0.965844	-0.438516	0.770812	-0.747255	-0.161244	-1.14703	-0.666816	-0.910018	-1.60666	-0.161244	-0.0591515	-0.144836	0.0558218	0.235962	-0.666816	0.47617	0.999341	0.137056	0.0558218	0.16902
PC ae C32:1	0.828729	0.321373	-0.213193	-0.0442393	-1.20253	1.74295	-0.213193	-1.14703	-0.84181	0.496782	0.0390657	-0.253363	-0.144836	-0.417426	0.457702	-0.84181	-0.910018	0.557168	1.38071	0.578176	0.999341	0.120971	0.892852	-1.14703	-0.6197	0.67192	-0.717119	-0.378998	-0.323149	1.03897	-0.981012	0.377892	0.120971	0.154008	-0.196223	-0.108517	-0.981012	-1.20253	0.25234	0.10502	-0.127026	-1.81114	-0.84181	-0.525978	0.10502	-0.482862	-0.179088	0.535445	0.828729
PC ae C32:2	1.57182	0.377892	1.46252	1.38071	-0.502109	0.185757	-0.196223	-0.398066	-0.27137	1.13285	0.321373	-0.127026	-0.378998	-0.108517	0.16902	-0.593958	0.321373	0.770812	1.13285	-0.0117219	0.0558218	0.270932	-0.780742	-1.48575	-0.417426	0.220102	-0.6197	-0.593958	0.799288	1.18135	0.185757	0.496782	0.137056	0.397843	-0.981012	-0.981012	-1.14703	-1.09797	0.718977	0.578176	-0.108517	-1.09797	-0.323149	-0.747255	0.622713	0.744492	1.30558	2.05264	0.744492
PC ae C34:0	0.770812	0.646688	-0.108517	1.57182	-0.378998	-0.253363	-0.0285242	0.965844	-1.60666	-1.20253	0.202454	0.892852	0.418641	-0.0751109	0.799288	-0.644082	0.202454	0.601825	0.718977	1.46252	0.0211458	0.457702	-0.398066	-1.81114	0.397843	0.088708	-0.981012	-0.910018	2.05264	0.516621	-0.84181	0.578176	-0.0751109	-0.593958	-1.81114	0.418641	-0.548617	-1.14703	0.137056	0.30507	-0.0285242	-0.0117219	-0.359954	-1.32578	-0.144836	-0.144836	-0.340958	-0.780742	0.10502
PC ae C34:1	0.67192	0.0728579	-0.482862	-0.359954	-0.0751109	1.18135	-0.0751109	-0.323149	-0.717119	-0.127026	0.999341	-0.179088	0.744492	-1.14703	-0.233338	0.088708	-0.417426	0.859814	1.46252	1.08564	0.859814	0.377892	0.287434	-0.161244	0.137056	0.799288	0.00322246	-0.340958	0.0390657	0.67192	-0.691965	-0.0285242	-0.359954	-0.340958	-0.459618	-0.0285242	-0.6197	-0.417426	0.0211458	-0.502109	0.25234	-0.873398	-1.26117	-2.36526	0.220102	0.120971	-0.0751109	-0.548617	0.154008
PC ae C34:2	1.24027	0.859814	0.928707	0.770812	-0.717119	0.30507	0.578176	-0.213193	0.321373	1.03897	0.0558218	-0.808157	-0.644082	0.220102	-0.340958	0.287434	-0.0591515	0.0211458	0.799288	-0.127026	-0.570385	0.601825	-0.666816	-0.84181	-0.666816	0.137056	-0.417426	-0.438516	-0.417426	0.892852	-0.459618	0.137056	0.0211458	0.457702	-0.525978	-0.502109	-0.570385	-0.873398	-0.482862	-0.291059	-0.944384	-0.747255	-1.14703	-0.30665	0.154008	0.00322246	0.25234	1.57182	1.13285
PC ae C34:3	0.287434	0.437555	1.57182	1.74295	-0.144836	0.16902	0.16902	0.30507	0.270932	0.694856	0.154008	-0.359954	-0.253363	0.340544	0.770812	0.965844	0.185757	-0.873398	0.120971	-1.60666	-1.02048	0.185757	0.0728579	-0.213193	-1.60666	-1.48575	-1.81114	-1.60666	-1.81114	0.859814	0.828729	0.67192	0.999341	1.03897	0.47617	0.892852	-1.48575	-1.32578	0.892852	0.799288	0.744492	0.535445	-1.48575	-1.09797	-0.0920673	-0.30665	0.088708	0.744492	0.578176
PC ae C36:0	-0.0920673	0.270932	1.24027	0.088708	-1.60666	0.578176	0.10502	-1.81114	0.67192	-0.233338	0.00322246	-0.323149	-0.502109	-0.84181	0.120971	-0.253363	0.67192	0.578176	1.57182	-0.323149	-1.14703	0.418641	0.154008	-2.36526	1.13285	-0.398066	-0.108517	0.185757	-0.0117219	0.358919	-1.32578	-0.253363	1.03897	0.859814	-1.39904	0.828729	-0.0117219	0.418641	1.46252	0.67192	0.10502	-0.196223	0.0558218	-0.459618	-0.717119	-0.323149	0.185757	-1.48575	-0.525978
PC ae C36:1	-0.27137	-0.84181	0.16902	-0.253363	0.744492	-0.196223	-0.108517	1.13285	-0.666816	-1.26117	1.08564	0.694856	1.03897	0.30507	-0.644082	0.120971	-0.340958	1.03897	0.154008	0.340544	0.30507	-0.378998	-0.808157	0.340544	0.928707	0.965844	1.13285	0.235962	0.0558218	-0.0285242	0.418641	-0.459618	0.0558218	0.0558218	-0.0920673	-0.593958	-0.747255	0.0211458	-0.108517	0.202454	0.999341	0.377892	-0.644082	-1.81114	0.377892	0.397843	-0.548617	-1.09797	-1.05336
PC ae C36:2	0.601825	-0.398066	0.287434	0.47617	0.578176	0.516621	1.46252	0.828729	-0.873398	-0.910018	0.220102	0.744492	0.0211458	0.270932	0.622713	-0.0117219	-0.808157	0.321373	0.16902	0.516621	0.235962	-1.60666	-0.548617	-0.910018	0.202454	1.24027	0.321373	-0.747255	0.120971	0.457702	0.496782	0.0390657	-0.108517	-0.438516	-0.944384	-0.808157	-0.525978	-0.593958	0.0728579	-0.161244	0.892852	-1.02048	0.321373	0.0390657	0.137056	0.137056	-0.0285242	-0.0117219	-0.666816
PC ae C36:3	0.928707	0.744492	0.646688	0.799288	0.220102	0.321373	0.718977	0.0390657	-0.808157	0.0728579	0.744492	-0.340958	0.377892	0.00322246	0.397843	0.496782	-0.6197	-0.196223	0.358919	-0.570385	-0.459618	-0.398066	-0.30665	-0.27137	-0.340958	0.418641	-0.0591515	-0.144836	0.154008	0.601825	0.202454	0.30507	0.601825	0.535445	0.235962	-1.26117	-0.378998	-0.459618	0.340544	0.0728579	0.287434	-0.910018	-1.02048	-1.02048	0.0728579	0.0390657	0.358919	0.770812	0.622713
PC ae C36:4	0.744492	1.24027	0.965844	0.999341	-0.0285242	0.397843	0.377892	-0.127026	-0.438516	0.321373	0.0211458	-0.525978	0.10502	0.321373	0.185757	0.718977	-0.0285242	-0.548617	0.457702	-0.747255	-0.780742	-0.179088	-0.323149	-0.417426	-1.39904	-0.593958	-1.09797	-1.14703	-0.910018	1.38071	0.557168	1.18135	0.892852	0.965844	0.496782	0.270932	-1.02048	-1.48575	0.859814	0.622713	0.496782	0.00322246	-2.36526	-0.981012	0.0211458	-0.161244	0.235962	1.46252	0.965844
PC ae C36:5	0.0211458	1.08564	0.999341	1.46252	0.287434	0.340544	0.0558218	-0.0117219	-0.0285242	0.828729	-0.525978	-0.6197	-0.213193	-0.179088	-0.30665	0.340544	-0.291059	-0.691965	0.516621	-0.910018	-1.09797	-0.108517	0.358919	-0.438516	-1.81114	-1.02048	-1.60666	-1.39904	-1.05336	0.999341	0.457702	1.24027	0.799288	0.999341	0.535445	0.578176	-1.20253	-1.26117	0.999341	0.718977	0.557168	0.10502	-1.32578	-0.593958	-0.438516	-0.747255	-0.0591515	0.799288	1.24027
PC ae C38:0	-0.593958	0.0390657	-1.09797	-0.233338	1.18135	0.646688	1.74295	-0.593958	-0.502109	-1.14703	-1.05336	0.10502	0.185757	0.770812	0.220102	0.235962	0.00322246	0.137056	-0.438516	0.137056	0.00322246	-0.717119	0.321373	0.0211458	0.10502	0.578176	-0.438516	-0.944384	-0.873398	-0.233338	0.137056	-0.323149	1.46252	0.601825	-0.502109	-0.747255	-0.0751109	0.437555	0.928707	0.535445	0.47617	0.0728579	0.287434	1.13285	-1.05336	-0.910018	-1.26117	-0.644082	0.0211458
PC ae C38:2	0.088708	-0.291059	-0.0591515	-0.910018	-0.161244	-1.05336	0.828729	1.18135	0.397843	-0.340958	0.16902	0.270932	0.25234	1.30558	-0.144836	-0.161244	-0.30665	0.0728579	-0.747255	-1.39904	0.321373	-0.30665	-0.644082	0.718977	1.24027	0.999341	2.05264	0.928707	-0.291059	0.25234	1.38071	0.397843	0.25234	0.220102	-0.910018	-0.780742	-0.0442393	-0.213193	0.16902	-0.196223	0.437555	-0.108517	0.965844	0.557168	0.185757	0.418641	-0.0442393	-0.0751109	-0.548617
PC ae C38:3	-0.359954	-0.359954	-0.417426	-0.717119	0.270932	-0.873398	1.03897	0.999341	-0.0117219	-0.438516	-0.459618	0.25234	0.47617	0.601825	-0.127026	-0.0285242	-1.48575	-0.213193	0.418641	-0.438516	-0.108517	-0.780742	-0.6197	0.557168	0.601825	1.13285	1.38071	0.859814	0.358919	0.646688	0.770812	-0.233338	0.287434	-0.0442393	-0.0751109	-1.14703	0.202454	0.25234	-0.291059	-0.27137	0.799288	-0.127026	0.578176	0.202454	-0.378998	-0.340958	-0.323149	0.0390657	-0.717119
PC ae C38:4	0.137056	0.535445	0.202454	0.965844	0.47617	0.744492	1.08564	-0.253363	-1.26117	-1.39904	-0.644082	0.0390657	0.397843	-0.593958	-0.0442393	-0.378998	-0.666816	0.185757	0.235962	1.18135	-0.30665	-1.81114	-0.0591515	-0.6197	0.0558218	1.08564	0.0211458	-0.0751109	0.25234	0.694856	-0.291059	0.799288	0.235962	0.496782	0.287434	-0.213193	-0.459618	-0.27137	0.397843	-0.253363	0.535445	-0.981012	-0.666816	-0.179088	-0.340958	-0.525978	-0.717119	0.120971	0.437555
PC ae C38:5	0.799288	1.18135	0.154008	0.578176	-0.525978	0.928707	0.220102	-0.84181	-1.02048	0.137056	-0.0285242	0.16902	0.235962	-0.944384	-0.570385	-0.213193	-1.09797	-0.378998	1.03897	-0.108517	-0.666816	-0.808157	0.30507	-1.02048	-0.780742	-0.0285242	-0.873398	0.088708	0.457702	1.30558	0.25234	1.30558	0.418641	0.30507	0.999341	-0.570385	-0.253363	-0.84181	0.30507	-0.0442393	-0.0920673	-0.944384	-0.944384	0.270932	-0.127026	-0.780742	0.154008	1.03897	1.30558
PC ae C38:6	0.185757	1.57182	0.694856	1.08564	-0.108517	0.718977	-0.0920673	0.397843	-0.179088	0.859814	-0.666816	-0.161244	-0.323149	0.185757	-0.27137	-0.0920673	-0.525978	-1.09797	0.601825	-1.14703	-1.05336	-0.525978	0.516621	-0.593958	-1.32578	-0.780742	-1.05336	-1.20253	-1.09797	2.05264	0.965844	2.05264	0.828729	0.770812	0.578176	0.535445	-0.84181	-0.981012	1.08564	0.516621	0.358919	0.25234	-1.39904	-1.05336	-0.84181	-0.717119	-0.378998	-0.253363	1.38071
PC ae C40:1	0.321373	1.13285	-0.780742	-0.27137	0.00322246	0.999341	2.05264	0.557168	-1.39904	-0.570385	-1.60666	0.00322246	-0.459618	0.496782	1.03897	-0.570385	-0.179088	-0.291059	-1.14703	0.377892	0.892852	0.646688	0.496782	-0.0117219	-0.127026	0.0728579	-0.747255	-1.32578	-1.48575	-0.144836	0.892852	-0.213193	1.13285	-0.910018	-0.808157	-0.127026	0.120971	-0.253363	0.535445	0.137056	1.46252	0.437555	0.270932	1.30558	0.202454	0.0558218	0.437555	0.321373	0.601825
PC ae C40:2	0.0728579	0.965844	-0.502109	-0.196223	-0.644082	0.67192	0.30507	0.47617	-0.548617	-0.0920673	0.718977	0.557168	-0.417426	1.46252	0.0558218	0.999341	0.270932	-0.780742	0.0211458	-0.144836	-0.233338	-0.873398	-0.144836	-0.0442393	0.744492	0.120971	0.235962	1.57182	0.16902	0.321373	-0.482862	0.340544	-0.398066	-0.0920673	-0.144836	0.00322246	-0.108517	-0.438516	-0.459618	-0.378998	-0.398066	-0.253363	-0.6197	-0.0751109	-0.417426	-0.127026	0.418641	0.67192	0.694856
PC ae C40:3	-0.340958	-0.144836	-0.0442393	-0.144836	-0.0920673	-0.548617	0.859814	1.08564	-0.691965	-0.323149	0.47617	-0.644082	-0.0751109	1.03897	-0.873398	0.0728579	0.0558218	0.287434	-0.359954	-0.691965	-0.6197	-0.144836	0.10502	0.828729	0.999341	0.859814	1.24027	1.30558	0.0728579	0.0211458	0.377892	0.516621	-0.291059	-0.502109	0.270932	0.16902	0.220102	-0.359954	0.457702	0.220102	-0.233338	0.137056	-0.340958	-0.253363	-0.359954	-0.179088	0.0558218	1.13285	-0.359954
PC ae C40:4	-0.108517	0.0558218	-0.398066	-0.0285242	-0.6197	-0.482862	1.18135	0.535445	-0.0591515	-0.161244	-0.340958	-0.0285242	0.270932	0.799288	-0.459618	-0.808157	-0.127026	-0.0442393	-0.981012	0.120971	0.340544	-0.644082	-1.14703	0.646688	0.892852	0.828729	0.287434	0.321373	0.088708	0.0558218	0.859814	0.965844	-0.0442393	-0.127026	-0.398066	-0.340958	0.30507	-0.482862	0.287434	0.185757	0.770812	0.496782	-0.213193	0.799288	-0.27137	-0.6197	-0.747255	-0.525978	0.120971
PC ae C40:5	-1.14703	0.397843	-0.179088	-0.666816	-0.127026	-0.0920673	0.799288	0.516621	-0.482862	-0.6197	-0.570385	0.496782	0.622713	-0.873398	-0.691965	-1.14703	-0.323149	-0.502109	-0.30665	0.437555	-0.179088	-1.20253	0.646688	0.16902	0.287434	0.437555	0.622713	0.457702	-0.644082	1.08564	0.601825	1.38071	-0.161244	-0.378998	-0.0442393	-0.0751109	-0.179088	-0.161244	1.30558	0.270932	0.828729	0.418641	0.892852	0.578176	-1.48575	-1.48575	-1.32578	-1.39904	0.185757
PC ae C40:6	0.47617	1.03897	0.0558218	-0.127026	-1.39904	1.03897	0.622713	-0.910018	-1.20253	0.0558218	0.120971	0.601825	0.120971	-0.691965	-0.213193	-0.108517	-0.691965	0.0558218	0.47617	0.457702	-0.253363	-1.39904	0.202454	-0.644082	-0.717119	0.10502	-0.548617	-0.6197	-0.780742	1.46252	0.928707	1.57182	0.270932	-0.666816	0.457702	-0.30665	-0.666816	-0.108517	0.321373	0.0211458	0.0390657	-1.20253	-0.0920673	0.340544	-0.570385	-1.32578	-0.482862	-0.378998	1.57182
PC ae C42:2	0.235962	0.557168	0.270932	0.744492	-0.747255	-0.340958	0.694856	1.24027	0.457702	0.10502	-0.0591515	0.377892	-1.39904	0.358919	0.0728579	0.397843	0.744492	-1.60666	-0.502109	-0.666816	-0.873398	-1.05336	-0.944384	0.202454	0.418641	-0.0442393	0.47617	0.358919	1.24027	-0.981012	-0.0591515	-0.438516	-0.253363	1.24027	-0.179088	-0.873398	0.340544	-0.548617	0.437555	0.287434	0.088708	0.202454	0.744492	0.47617	1.24027	0.770812	0.00322246	0.965844	0.557168
PC ae C42:3	0.694856	0.578176	0.437555	1.30558	-1.02048	0.088708	1.57182	0.340544	-0.644082	0.578176	1.30558	0.397843	-0.233338	-0.30665	1.46252	0.646688	0.770812	-1.81114	0.557168	0.202454	-0.644082	-0.27137	0.0390657	-0.179088	0.0211458	0.00322246	-0.0117219	0.535445	0.718977	-1.81114	-1.02048	-1.32578	-0.570385	0.270932	0.340544	-0.482862	-0.593958	-0.30665	1.03897	-0.127026	-0.981012	0.321373	-0.525978	0.859814	0.718977	0.601825	0.287434	0.928707	0.00322246
PC ae C44:3	-0.323149	-0.0920673	-0.84181	0.185757	-0.691965	0.270932	-0.291059	-0.873398	0.496782	0.999341	0.340544	0.0728579	-0.525978	0.287434	-0.417426	0.137056	0.418641	-0.525978	-0.127026	-0.482862	1.24027	0.202454	1.18135	0.965844	0.557168	0.601825	-0.323149	-0.27137	0.377892	-2.36526	-0.0442393	-0.30665	0.30507	0.67192	-1.02048	-0.0920673	-0.161244	0.10502	-0.502109	0.646688	0.397843	-0.213193	1.46252	-0.340958	-0.398066	-0.359954	-0.525978	-0.233338	0.088708
SM (OH) C14:1	0.646688	0.202454	-1.39904	-0.84181	0.67192	0.965844	0.418641	-0.691965	0.0390657	0.965844	0.137056	0.828729	-0.593958	0.47617	0.0390657	0.622713	0.220102	-0.459618	0.999341	0.928707	0.928707	0.799288	-0.253363	-0.323149	-0.253363	-0.0920673	-0.359954	0.220102	0.321373	0.535445	0.00322246	-0.196223	-1.05336	-0.179088	-1.48575	-0.27137	-0.359954	-0.717119	0.557168	-0.0117219	0.120971	0.16902	-1.09797	-1.39904	0.67192	0.088708	0.30507	0.185757	0.340544
SM (OH) C16:1	1.38071	0.828729	0.0390657	1.24027	-1.09797	0.457702	0.496782	-0.717119	0.25234	0.646688	0.770812	0.622713	-1.09797	1.18135	0.516621	1.24027	0.535445	-0.179088	0.287434	0.47617	0.47617	0.16902	-1.05336	-1.09797	-0.378998	-0.0751109	-0.525978	-0.0285242	0.287434	-0.84181	-0.0920673	-0.0920673	-0.981012	-0.482862	-0.127026	0.397843	-0.340958	-0.525978	1.13285	-0.323149	-0.459618	-0.525978	-0.253363	-1.60666	1.57182	-0.0751109	0.516621	-0.340958	0.770812
SM (OH) C22:1	0.718977	0.516621	-0.161244	-0.161244	0.892852	1.38071	0.185757	-0.340958	0.928707	1.24027	0.377892	-0.144836	-0.438516	0.25234	1.57182	0.67192	0.287434	-0.666816	0.220102	1.38071	-0.525978	-0.359954	-0.747255	-0.340958	-0.398066	-1.05336	-2.36526	-2.36526	0.00322246	-0.0751109	-0.666816	0.437555	-0.780742	-1.60666	-0.213193	0.154008	-0.873398	-0.144836	0.202454	-0.873398	-1.20253	-0.780742	0.516621	0.0558218	1.13285	0.67192	0.718977	1.24027	0.928707
SM (OH) C22:2	0.892852	1.74295	-0.808157	-0.944384	0.16902	1.57182	0.457702	-0.378998	1.08564	0.770812	0.185757	0.646688	-0.691965	0.0558218	0.00322246	0.928707	-0.378998	-0.808157	0.321373	2.05264	0.601825	0.557168	-0.0285242	0.287434	-1.20253	-1.09797	-1.39904	-0.644082	-0.548617	-0.438516	-0.593958	0.270932	-1.26117	-0.717119	-1.05336	0.622713	-1.05336	-0.378998	-0.144836	-0.944384	-1.14703	-0.6197	-0.459618	-0.144836	0.516621	-0.27137	1.03897	0.25234	1.74295
SM (OH) C24:1	1.46252	1.46252	-0.438516	-0.747255	0.601825	0.496782	-0.0591515	-1.26117	0.30507	0.892852	0.799288	-0.593958	-0.666816	0.828729	1.13285	1.38071	0.601825	-0.482862	0.137056	0.270932	-0.359954	0.496782	-1.09797	-0.291059	-0.747255	-1.60666	-1.02048	-0.691965	0.496782	0.185757	-0.144836	0.457702	-1.81114	-0.0285242	-0.780742	0.220102	-1.09797	0.287434	-0.0442393	-0.644082	-0.691965	-0.417426	0.622713	0.185757	2.05264	0.718977	0.67192	1.30558	1.46252
SM C16:0	1.30558	0.770812	0.120971	0.437555	0.10502	0.154008	0.340544	-1.48575	0.0558218	0.287434	0.67192	0.535445	-0.84181	1.38071	0.30507	0.799288	0.397843	-0.644082	0.30507	0.622713	0.397843	0.287434	-0.359954	-0.780742	-0.30665	-0.323149	-0.593958	0.397843	-0.502109	-0.0920673	-0.780742	-0.179088	-0.644082	0.892852	0.088708	0.088708	-0.127026	-0.691965	0.770812	-0.593958	-0.780742	-0.644082	-0.291059	-0.196223	1.74295	0.694856	0.47617	0.154008	1.18135
SM C16:1	0.999341	-0.127026	-0.525978	-0.438516	0.799288	-0.0591515	-0.233338	-0.666816	0.220102	-0.144836	1.18135	0.137056	-1.20253	1.24027	0.340544	2.05264	-0.253363	-0.0751109	1.24027	0.358919	0.516621	-0.944384	-0.525978	-1.05336	-0.0591515	-0.161244	-0.340958	0.340544	-0.127026	-0.808157	-0.873398	-0.981012	-0.127026	0.088708	2.05264	-0.196223	0.457702	-0.747255	0.377892	-1.09797	-0.570385	-0.340958	0.47617	-0.873398	1.38071	0.535445	1.57182	0.622713	0.220102
SM C18:0	0.220102	0.287434	0.457702	0.535445	-1.32578	-0.502109	0.437555	-1.02048	0.557168	0.622713	-0.438516	-1.09797	-1.48575	1.74295	1.74295	1.46252	0.718977	-0.593958	0.496782	-0.417426	-0.291059	0.0728579	0.694856	-0.0591515	-0.161244	0.358919	-0.233338	0.516621	1.57182	-1.48575	-2.36526	-0.747255	0.321373	0.578176	0.892852	0.965844	0.377892	0.270932	0.235962	-0.482862	-0.359954	-0.808157	0.00322246	-0.570385	0.16902	-0.548617	-0.502109	-0.0920673	0.67192
SM C18:1	1.74295	0.120971	-1.14703	-1.60666	-0.459618	0.0728579	-0.359954	-0.780742	-1.32578	0.088708	0.437555	-0.378998	-0.548617	0.892852	1.24027	1.57182	0.340544	-0.944384	1.74295	0.287434	0.457702	-0.981012	-0.213193	-1.26117	-0.0751109	0.0558218	-0.502109	-0.666816	-0.27137	0.622713	0.799288	-0.717119	0.770812	0.202454	1.46252	-0.233338	0.0558218	0.185757	-0.323149	-1.14703	-0.213193	-1.32578	-0.127026	-0.944384	0.828729	-0.0117219	2.05264	0.377892	0.516621
SM C20:2	0.965844	-0.0591515	-2.36526	-0.417426	1.08564	-1.60666	-0.438516	1.03897	-0.213193	-0.0285242	0.622713	1.74295	-0.482862	0.744492	-0.253363	0.535445	0.47617	0.457702	0.859814	1.30558	-0.0591515	0.437555	0.928707	0.397843	-0.459618	0.694856	0.646688	0.47617	1.08564	0.770812	1.24027	-0.502109	-2.36526	-2.36526	-0.873398	0.358919	0.287434	-0.910018	-0.691965	-0.359954	-1.39904	-0.398066	0.0211458	1.18135	0.270932	0.457702	-0.161244	0.10502	-0.144836
SM C24:0	0.457702	-0.482862	0.0211458	0.270932	0.0211458	-0.438516	0.397843	-0.291059	-0.0442393	-0.253363	1.74295	1.38071	0.202454	0.928707	0.47617	0.557168	-0.161244	-0.0117219	-0.144836	-0.0920673	0.437555	-1.09797	-0.910018	0.457702	1.18135	1.38071	1.18135	0.999341	0.859814	-1.32578	-0.6197	-0.873398	0.202454	0.287434	0.516621	-1.09797	-0.291059	-0.291059	-0.213193	-0.6197	-0.179088	-0.291059	0.220102	-0.0442393	0.770812	0.321373	-0.0117219	-1.02048	-0.291059
SM C24:1	1.18135	2.05264	-0.30665	0.377892	-0.398066	2.05264	0.47617	-1.32578	0.770812	1.74295	0.457702	0.0558218	-0.910018	-0.438516	0.154008	0.516621	0.088708	-1.05336	0.0558218	1.74295	-0.438516	0.0558218	-0.0442393	-0.378998	-1.26117	-1.81114	-1.20253	-1.05336	-0.691965	0.220102	-1.26117	0.00322246	-0.378998	-0.525978	0.358919	0.557168	-1.32578	-0.0591515	-1.02048	-1.20253	-1.32578	-0.570385	-0.398066	0.646688	0.418641	-0.459618	0.270932	0.718977	2.05264
SM C26:1	0.557168	1.38071	0.185757	-0.548617	0.718977	1.30558	-0.0442393	-0.459618	0.828729	0.516621	0.496782	-1.32578	-1.60666	1.57182	-0.0751109	-0.0751109	0.859814	-0.398066	0.377892	0.496782	-0.196223	0.137056	-1.81114	1.03897	-1.09797	-1.32578	-1.14703	0.287434	-1.26117	0.340544	-0.378998	1.46252	-0.196223	-0.0591515	-0.253363	1.18135	-0.691965	-0.808157	0.646688	-1.02048	-0.0117219	-0.359954	-1.60666	0.088708	0.601825	0.10502	0.694856	0.088708	0.892852
H1	0.578176	0.10502	-1.32578	-1.81114	2.05264	1.46252	1.38071	-0.644082	1.74295	-0.359954	0.535445	2.05264	-1.26117	2.05264	0.828729	0.30507	-1.05336	-0.340958	-0.0920673	0.859814	-1.48575	-0.417426	1.74295	0.999341	-0.691965	0.892852	-0.910018	-0.0117219	-1.60666	1.24027	1.03897	-1.09797	0.088708	-1.48575	-2.36526	-0.323149	-0.717119	-0.6197	-0.873398	-0.808157	0.137056	-1.39904	-1.05336	0.928707	0.358919	-0.398066	-0.944384	-1.81114	-1.20253
aminoacids	-0.438516	-0.666816	0.67192	-0.398066	-0.323149	-0.717119	-1.39904	0.270932	0.088708	-0.644082	-0.161244	-0.548617	0.718977	-0.459618	-0.398066	-0.340958	1.13285	1.08564	-0.525978	-0.84181	0.622713	0.770812	0.00322246	0.10502	0.535445	-0.482862	0.859814	0.30507	0.185757	-0.359954	-0.0117219	0.154008	-0.548617	-0.108517	0.828729	0.202454	1.03897	0.928707	-0.378998	1.24027	0.00322246	1.08564	0.088708	-0.233338	-0.108517	1.30558	0.377892	-0.144836	-0.27137
biogenic amines	-0.717119	-0.747255	0.799288	0.154008	0.397843	-0.910018	0.137056	0.496782	1.03897	0.16902	-0.398066	-1.39904	0.0728579	0.120971	-0.482862	-0.127026	1.03897	-1.14703	-0.340958	-0.30665	-0.981012	0.859814	-0.438516	0.601825	-0.27137	-0.378998	0.418641	1.24027	-0.482862	-0.179088	0.0390657	0.321373	0.557168	0.340544	0.770812	1.30558	1.18135	0.377892	-1.14703	-1.60666	-1.02048	-0.84181	0.16902	0.601825	-0.253363	-0.291059	-0.593958	-0.30665	-0.459618
glycerophospholipids	0.340544	0.088708	0.358919	0.457702	0.235962	0.120971	0.892852	-0.0751109	-0.6197	-0.196223	0.235962	0.287434	0.154008	0.0390657	0.10502	0.154008	-0.398066	0.358919	0.67192	-0.196223	0.088708	-0.570385	-0.179088	-0.944384	0.0390657	0.557168	0.0390657	-0.233338	0.270932	0.496782	-0.30665	-0.144836	0.535445	0.718977	0.0390657	-1.05336	-0.30665	-0.644082	0.601825	0.358919	0.457702	-0.323149	-0.30665	-0.548617	0.0390657	-0.0591515	-0.291059	0.0728579	-0.0117219
sphingolipids	1.13285	0.999341	-0.570385	-0.108517	0.30507	0.828729	0.67192	-1.05336	0.235962	0.457702	0.557168	0.235962	-1.14703	0.999341	0.646688	1.03897	0.358919	-0.438516	0.828729	0.799288	0.25234	-0.0920673	-0.717119	-0.398066	-0.525978	-0.30665	-0.570385	0.154008	0.516621	-0.27137	-0.717119	-0.0591515	-1.02048	-0.359954	0.0728579	0.0558218	-0.398066	-0.570385	0.358919	-0.747255	-0.808157	-0.666816	-0.570385	-0.417426	1.03897	0.0728579	0.397843	0.220102	0.999341
KynTrp	0.25234	0.16902	-0.378998	0.892852	0.859814	1.13285	-0.144836	1.30558	0.646688	0.120971	1.24027	0.770812	-0.570385	-1.60666	-0.0591515	0.47617	-0.213193	-0.910018	-0.570385	0.999341	-2.36526	-2.36526	-0.981012	-0.359954	-1.48575	-2.36526	-1.26117	0.418641	-0.0591515	1.57182	1.57182	0.828729	-0.6197	-1.39904	-1.09797	1.24027	-2.36526	-0.666816	-0.196223	-1.26117	-1.26117	-1.14703	1.18135	1.24027	0.928707	0.0211458	0.999341	-0.359954	-0.0920673
[truncated: 141 more columns]
